# Supplementary material for: Simulation of electroporation threshold based on the evolution of transmembrane potential and pore density
Source: PeerJ journal article supplement (doi:10.7717/peerj.19356), 2025-04-28
Supplement: data_StaffSS.zip [file data_StaffSS.zip]

## Sheet: Sheet1
2.9kV-TMP for nuclear membrane.mph	2.6kV-TMP for ER.mph	3.5kV-N for nuclear membrane.mph	3.2kV-N for ER.mph	1.2kV-TMP for plasma membrane.mph	1.7kV-N for plasma membrane.mph
% Nodes: 1373	% Nodes: 3166	% Nodes: 1373	% Nodes: 3166	% Nodes: 15830	% Nodes: 1477
% Expressions: 1	% Expressions: 1	% Expressions: 1	% Expressions: 1	% Expressions: 1	% Expressions: 1
% arc (µm) Value	arc (µm) TMP	arc (µm) Dependent variable N	arc (µm) TMP	arc (µm) TMP	arc (µm) Dependent variable N
0 0.9927460746425707	0 0.3728098390859307	0 5.124365555294558E13	0 1.5191123087229733E9	0 0.005695832417511814	0 1.0332197328099225E14
0.01029278519414721 0.9954416553558803	0.01442452210061705 0.3728137026933682	0.01029278519414721 5.73067998836555E13	0.01442452210061705 1.5192699398629513E9	0.01442452210061705 0.0057004399247502216	0.0435724742151119 1.0172766678792645E14
0.020590905163766493 0.9979207828642176	0.02902356932899323 0.3728177562645376	0.020590905163766493 6.3347224706319086E13	0.02902356932899323 1.5194358317168179E9	0.02902356932899323 0.00570528610827714	0.08782399435682026 9.981651178366786E13
0.03089750266810824 1.0001834571675792	0.0438160190608783 0.3728219997994442	0.03089750266810824 6.936493002093635E13	0.0438160190608783 1.5196099842845724E9	0.0438160190608783 0.005710370968092903	0.13279454964236972 9.758850826821647E13
0.0412157127200675 1.0022296782659685	0.059215749515544217 0.3728266916112526	0.0412157127200675 7.53599158275073E13	0.059215749515544217 1.5198023902967436E9	0.059215749515544217 0.005716017281400808	0.17852224292272786 9.50436562415723E13
0.05067913226773608 1.0039306637746241	0.0746816161334006 0.37283162741632747	0.05067913226773608 8.060921991209603E13	0.0746816161334006 1.520005439468855E9	0.0746816161334006 0.005721971873366093	0.22652803312453426 9.213365656800616E13
0.06014218262089272 1.0054797061095817	0.09021364772872607 0.37283680721468127	0.06014218262089272 8.556792694753317E13	0.09021364772872607 1.5202191318009057E9	0.09021364772872607 0.0057282347439893124	0.2724872430918263 8.918853320780452E13
0.06960729778978275 1.0068768052708394	0.10594656583860378 0.37284242102216947	0.06960729778978275 9.023603693381872E13	0.10594656583860378 1.5204511353580847E9	0.10594656583860378 0.0057350395991280214	0.3164110343539204 8.620828616096736E13
0.07907691019246922 1.0081219612584027	0.12159575617484501 0.37284830449294315	0.07907691019246922 9.461354987095267E13	0.12159575617484501 1.5206957414724505E9	0.12159575617484501 0.005742173400386962	0.3583121950413644 8.31929154274947E13
0.08840073589318313 1.0092036228635655	0.1371795084704443 0.3728544576270112	0.08840073589318313 9.845028593189644E13	0.1371795084704443 1.5209529501440032E9	0.1371795084704443 0.005749636147767022	0.39553116281924666 8.04490936702721E13
0.09771955999092531 1.0101542556044771	0.15145009987874877 0.3728605086539245	0.09771955999092531 1.0181242076888964E14	0.15145009987874877 1.5212072688878431E9	0.15145009987874877 0.005756971566723056	0.4327448721856902 7.765467562389747E13
0.1070357033504246 1.0109738594811324	0.16564994519459542 0.37286686413004144	0.1070357033504246 1.046999543819323E14	0.16564994519459542 1.521476875306505E9	0.16564994519459542 0.005764662650983076	0.4699590011843449 7.480966128837086E13
0.11635148883998603 1.0116624344935383	0.17983993855550096 0.372873524055362	0.11635148883998603 1.0711288677102439E14	0.17983993855550096 1.5217617693999875E9	0.17983993855550096 0.005772709400547193	0.507179227666812 7.191405066369223E13
0.12537734930279448 1.0122096187586687	0.19194969308923854 0.37287959498562184	0.12537734930279448 1.0889142436508367E14	0.19194969308923854 1.5220236788369734E9	0.19194969308923854 0.005780029237024364	0.5389954612231445 6.950247769977464E13
0.13439432031852272 1.0126509510817785	0.20417722186595827 0.37288603917319296	0.13439432031852272 1.1018827045743898E14	0.20417722186595827 1.522305151257374E9	0.20417722186595827 0.005787783422657954	0.5722137102271024 6.701964598913001E13
0.143404501479494 1.0129864314628678	0.21659848445991994 0.37289285661808425	0.143404501479494 1.110034250480903E14	0.21659848445991994 1.522606186661189E9	0.21659848445991994 0.005795971957447853	0.6068344013695289 6.446555553175834E13
0.15240999712710923 1.0132160599019384	0.22804652024284996 0.37289969818894786	0.15240999712710923 1.1133688813703762E14	0.22804652024284996 1.5229114051985226E9	0.22804652024284996 0.0058041725249408085	0.6428579115064114 6.184020632765966E13
0.16286005360302283 1.0133587608448211	0.23984288260917283 0.37290804110594333	0.16286005360302283 1.1110489992135153E14	0.23984288260917283 1.523290638293617E9	0.23984288260917283 0.005814153076495464	0.6775007210682497 5.932726654598228E13
0.17331402701936624 1.01339133727119	0.2520610435169753 0.372917885369076	0.17331402701936624 1.1037765890737662E14	0.2520610435169753 1.5237438859464722E9	0.2520610435169753 0.005825913612111932	0.7124922322347311 5.680234899629171E13
0.18377537130637378 1.0133137891810504	0.2665018309072827 0.372927752417346	0.18377537130637378 1.0915516509511288E14	0.2665018309072827 1.5242114258437824E9	0.2665018309072827 0.005837673164480916	0.747832480193568 5.426545367858794E13
0.19424753310109652 1.0131261165743952	0.2803274508394413 0.37293535797291444	0.19424753310109652 1.074374184845603E14	0.2803274508394413 1.5245761536203465E9	0.2803274508394413 0.005846727035316967	0.7835214991009576 5.171658059287097E13
0.2057321122732874 1.0128150079039058	0.29358555004667675 0.3729407020357849	0.2057321122732874 1.0512950597117888E14	0.29358555004667675 1.524838069276164E9	0.29358555004667675 0.005853075224620085	0.8159040514089304 4.942164267393667E13
0.2172122786593467 1.0124253245406214	0.30843503131460426 0.3729457738444788	0.2172122786593467 1.0258649341346189E14	0.30843503131460426 1.5250889111964006E9	0.30843503131460426 0.005859085189688139	0.8478936877383435 4.71697725602987E13
0.22869259727746083 1.0119570664845439	0.3227538201447909 0.3729502002194698	0.22869259727746083 9.980838081140934E13	0.3227538201447909 1.5253104371916952E9	0.3227538201447909 0.005864319292684827	0.8794904149188606 4.496097025195707E13
0.24017763296429015 1.0114102337356714	0.3366183516022886 0.3729539811607703	0.24017763296429015 9.679516816502123E13	0.3366183516022886 1.5255026472620478E9	0.3366183516022886 0.005868777533610591	0.9106942400381366 4.2795235748911766E13
0.251033344574541 1.0108484057219647	0.351976930217262 0.37295768170914645	0.251033344574541 9.392361756377094E13	0.351976930217262 1.5256924855640595E9	0.351976930217262 0.005873129003954646	0.9384062841985428 4.088906160845343E13
0.2618774329199248 1.0102633523409663	0.36702359040060556 0.37296095853912536	0.2618774329199248 9.110582812684764E13	0.36702359040060556 1.5258620128135011E9	0.36702359040060556 0.005876975211528634	0.9652831907485027 3.905327202426285E13
0.27271373688991046 1.0096550735926728	0.3818472007519143 0.3729638116507177	0.27271373688991046 8.834179985425138E13	0.3818472007519143 1.5260112290103717E9	0.3818472007519143 0.005880316156332887	0.9913250450799413 3.728786699634003E13
0.28354610365010013 1.0090235694770842	0.39935918257024444 0.37296673632951194	0.28354610365010013 8.563153274598212E13	0.39935918257024444 1.5261648160718539E9	0.39935918257024444 0.005883740039311357	1.0165319410713596 3.559284652468496E13
0.293307849787305 1.0084686182091778	0.4167861312106085 0.3729693324227208	0.293307849787305 8.339522014228634E13	0.4167861312106085 1.5263011175253778E9	0.4167861312106085 0.00588678654131669	1.0405034433496896 3.3990092995273184E13
0.3030743210488943 1.0079042974845462	0.4342071582543104 0.3729715999303478	0.3030743210488943 8.122074721891189E13	0.4342071582543104 1.5264201333709428E9	0.4342071582543104 0.005889455662349107	1.0631732559896165 3.248504446263263E13
0.31285257342216605 1.007330607303186	0.45447947934263405 0.37297388542541565	0.31285257342216605 7.910811397585877E13	0.45447947934263405 1.5265382041054225E9	0.45447947934263405 0.005892175763151707	1.0845417633278014 3.107770092676328E13
0.3226496374396698 1.0067475476650936	0.4747473707885521 0.372975938916805	0.3226496374396698 7.705732041312697E13	0.4747473707885521 1.5266418154125245E9	0.4747473707885521 0.0058946572478562045	1.1046094244690023 2.9768062387665145E13
0.3309126447250669 1.0062442305819568	0.49504072849594527 0.372977760404523	0.3309126447250669 7.53468160683915E13	0.49504072849594527 1.5267309672922478E9	0.49504072849594527 0.005896900116463043	1.1235737125748517 2.8511475083410848E13
0.3391705251871654 1.0057269289111614	0.5150619960189234 0.3729793908862087	0.3391705251871654 7.364618295409752E13	0.5150619960189234 1.5268063300975378E9	0.5150619960189234 0.00589897007212492	1.1425343245930693 2.7270191088467383E13
0.3474275265107358 1.0051956426527058	0.5348970643304178 0.3729809154302819	0.3474275265107358 7.195542107024502E13	0.5348970643304178 1.5268729141586165E9	0.5348970643304178 0.005900961394652459	1.1614969449707342 2.6044210402834754E13
0.35568789773677184 1.004650371806588	0.5545461341408628 0.3729823340367462	0.35568789773677184 7.027453041683402E13	0.5545461341408628 1.5269307194754837E9	0.5545461341408628 0.005902874084046438	1.1804672563495138 2.483353302651296E13
0.3637709800297219 1.004100985999611	0.571374359802749 0.37298351123860574	0.3637709800297219 6.862887178124317E13	0.571374359802749 1.5269745497078445E9	0.571374359802749 0.005904520272754898	1.199163200688065 2.3704428142121676E13
0.3718412461017009 1.0035350603485886	0.5879247900272213 0.3729846559466443	0.3718412461017009 6.698650173657743E13	0.5879247900272213 1.527014440631217E9	0.5879247900272213 0.005906162290485128	1.2178559431228757 2.262350382988728E13
0.37990264877226 1.002952594853519	0.604222528282927 0.3729857681608797	0.37990264877226 6.53474202828368E13	0.604222528282927 1.5270503922456007E9	0.604222528282927 0.0059078001372380165	1.236545710646432 2.1590760089809773E13
0.3879591539070992 1.002353589514402	0.6187772704959258 0.3729867654305421	0.3879591539070992 6.371162742002126E13	0.6187772704959258 1.52708033554777E9	0.6187772704959258 0.005909304970954431	1.2552327303596311 2.0606196921889152E13
0.39555598460734787 1.0017889613326139	0.6331460404043134 0.37298774800684686	0.39555598460734787 6.221315286068E13	0.6331460404043134 1.5271093643608406E9	0.6331460404043134 0.00591079970510111	1.2770257982543007 1.950098408541477E13
0.4031518471937034 1.0011950555371838	0.6473979586524804 0.372988715889794	0.4031518471937034 6.068322703928557E13	0.6473979586524804 1.5271374786848123E9	0.6473979586524804 0.00591228433967783	1.2988144093887104 1.8439589506902203E13
0.4107675798667287 1.0005718721281083	0.6619772996225884 0.37298969139694105	0.4107675798667287 5.912184995583797E13	0.6619772996225884 1.527167360116332E9	0.6619772996225884 0.005913765316314711	1.3205989327279064 1.7422013186351453E13
0.41842385858662956 0.9999194111053944	0.6765012340255188 0.37299065453561564	0.41842385858662956 5.752902161033719E13	0.6765012340255188 1.527196356078348E9	0.6765012340255188 0.005915243387496271	1.3423797374446755 1.644825512376252E13
0.4257228332869881 0.9992585265058151	0.6909731176021753 0.3729916053058089	0.4257228332869881 5.59384741752546E13	0.6909731176021753 1.5272244665708597E9	0.6909731176021753 0.005916718553222621	1.368533186396501 1.5332245980578555E13
0.43298494105212043 0.998523717350781	0.7079251333766969 0.37299271286172964	0.43298494105212043 5.4235861029527695E13	0.7079251333766969 1.527255632187112E9	0.7079251333766969 0.005918474570832498	1.3946801027220677 1.427130500778245E13
0.4402281048917374 0.9977149836402832	0.7247736175169504 0.3729938091193139	0.4402281048917374 5.242118217315647E13	0.7247736175169504 1.527284888108946E9	0.7247736175169504 0.005920259322270026	1.420821144201347 1.3265432205374201E13
0.44747038846267645 0.996832325374327	0.7415186187329916 0.372994894078567	0.44747038846267645 5.0494437606140914E13	0.7415186187329916 1.527312234336361E9	0.7415186187329916 0.005922072807535427	1.4469569690578798 1.2314627573353814E13
0.4547403362915417 0.9957515128017063	0.7619653665174261 0.3729962237077329	0.4547403362915417 4.817862835124389E13	0.7619653665174261 1.527343024396219E9	0.7619653665174261 0.005924384156055561	1.4774786904295665 1.1270976938416178E13
0.46200911502115244 0.9945048076313485	0.7821955014531488 0.37299753302337546	0.46200911502115244 4.568686862251805E13	0.7821955014531488 1.5273713084120467E9	0.7821955014531488 0.005926778198703574	1.507991525009784 1.0293455850948547E13
0.4692988494133879 0.9930922098632537	0.8022200858104304 0.3729988220254983	0.4692988494133879 4.301915841996337E13	0.8022200858104304 1.527397086383843E9	0.8022200858104304 0.005929254935480021	1.5384965577394725 9.38206431095092E12
0.4766314745437435 0.9915137194974273	0.8231447554789282 0.37300015691616206	0.4766314745437435 4.0175497743579875E13	0.8231447554789282 1.5274217481430426E9	0.8231447554789282 0.005932017144355316	1.5689948743921949 8.536802318423296E12
0.4835747124852302 0.9898284803176525	0.8438758544952243 0.37300141560674316	0.4835747124852302 3.734224037491476E13	0.8438758544952243 1.5274445869142356E9	0.8438758544952243 0.005934910585831953	1.6034475222221753 7.657380670432561E12
0.4904794717397553 0.9879669564231657	0.864483190909981 0.37300259809724867	0.4904794717397553 3.4489147838225594E13	0.864483190909981 1.5274656026974213E9	0.864483190909981 0.005937935259910153	1.6378892132018024 6.84863842202218E12
0.4973643866540227 0.9859291478139633	0.8824034632829456 0.373003519414433	0.4973643866540227 3.161622013351239E13	0.8824034632829456 1.5274827223325818E9	0.8824034632829456 0.0059407365676112924	1.6723215760004544 6.110575573192156E12
0.5042482527300987 0.9837150544900508	0.9004435428360121 0.3730042603279289	0.5042482527300987 2.8723457260775133E13	0.9004435428360121 1.5274992694733477E9	0.9004435428360121 0.005943684388103997	1.7067462406114882 5.443192123942488E12
0.5106753452589139 0.9814213785527963	0.9187085351066687 0.3730048208377328	0.5106753452589139 2.6008462282977977E13	0.9187085351066687 1.5275152441197178E9	0.9187085351066687 0.0059467787213881565	1.742473440994768 4.816887107677121E12
0.5171417673676065 0.9788961564746481	0.9351507129755151 0.3730050591449432	0.5171417673676065 2.335821344411351E13	0.9351507129755151 1.5275291039493763E9	0.9351507129755151 0.005949678986701067	1.7781898575558195 4.249287629355027E12
0.5236671798783901 0.976139388255608	0.9520629795052532 0.3730049315372588	0.5236671798783901 2.077271074418174E13	0.9520629795052532 1.5275430975786023E9	0.9520629795052532 0.005952744808456977	1.8138973927887243 3.740393688976206E12
0.530270716735125 0.9731510738956777	0.9695452834305549 0.3730044380146813	0.530270716735125 1.8251954183182652E13	0.9695452834305549 1.5275572250073957E9	0.9695452834305549 0.005955976186655997	1.849597950607428 3.290205286540658E12
0.536767955163222 0.9699413150923748	0.9850338214028073 0.37300352409939297	0.536767955163222 1.5914607691002438E13	0.9850338214028073 1.5275695062845836E9	0.9850338214028073 0.005958888188913879	1.8804407204470817 2.9385495535731885E12
0.5432651935913186 0.9664788524206562	1.0011833991606827 0.3730019861518885	0.5432651935913186 1.3744679758380188E13	1.0011833991606827 1.5275822425319264E9	1.0011833991606827 0.005961937711449038	1.9112767353000664 2.618887851370708E12
0.5497820163813232 0.9627636858805184	1.0180565868784324 0.37299982417218036	0.5497820163813232 1.1742170385315902E13	1.0180565868784324 1.5275954337494247E9	1.0180565868784324 0.005965124754261918	1.942107274254114 2.331220179933217E12
0.5563378323828512 0.9587958154719649	1.0330500174926867 0.3729971902639475	0.5563378323828512 9.90707957180958E12	1.0330500174926867 1.527607025110019E9	1.0330500174926867 0.005967941931594555	1.9729336170785978 2.075546539260715E12
0.5628936483843813 0.9545524697287471	1.0467351641080964 0.37299422479774424	0.5628936483843813 8.301512943529166E12	1.0467351641080964 1.5276173426482806E9	1.0467351641080964 0.0059705112002494945	1.9985269093905618 1.8813179226404436E12
0.5694104711743876 0.9501081552720292	1.0591393414391113 0.3729909277735848	0.5694104711743876 6.886337607087848E12	1.0591393414391113 1.527626386364208E9	1.0591393414391113 0.005972832560227514	2.0241165234092673 1.7031580008927122E12
0.5759077096024866 0.9454628721018059	1.071450227740386 0.3729871038832142	0.5759077096024866 5.661553562485627E12	1.071450227740386 1.5276352118548174E9	1.071450227740386 0.005975092234241418	2.0497032173832808 1.5410667740175205E12
0.5824049480305854 0.9406166202180808	1.0827065941557732 0.37298323891979823	0.5824049480305854 4.627160809722503E12	1.0827065941557732 1.5276433248484416E9	1.0827065941557732 0.005977107329366182	2.0752877498207942 1.395044242014869E12
0.589008484887319 0.9354958388119163	1.0929354985852542 0.3729793328833422	0.589008484887319 3.7615331628897715E12	1.0929354985852542 1.5276507253450804E9	1.0929354985852542 0.0059788778456019145	2.096455404903893 1.2832184425849214E12
0.5955338973981013 0.9303478532237834	1.1029293977789505 0.37297536929752173	0.5955338973981013 3.0336043400010054E12	1.1029293977789505 1.5276584930231886E9	1.1029293977789505 0.00598050931729066	2.117621192986733 1.1795931936105183E12
0.6020003195067927 0.9251726634536874	1.1122320689983767 0.3729716440418267	0.6020003195067927 2.443374341056205E12	1.1122320689983767 1.5276663219998443E9	1.1122320689983767 0.005981952234270892	2.1387855561134335 1.0841684950916598E12
0.6084274120356064 0.9199702695016247	1.120849277627271 0.3729681571162624	0.6084274120356064 1.9908431660553704E12	1.120849277627271 1.5276742122750466E9	1.120849277627271 0.005983206596542722	2.1599489364174036 9.969443470283457E11
0.6149914987808113 0.9146864925212954	1.1287895092725817 0.3729651236864351	0.6149914987808113 1.6130245063437466E12	1.1287895092725817 1.5276826790650804E9	1.1287895092725817 0.00598427757962161	2.178451365375088 9.25876929531676E11
0.6215893063876224 0.9094302538433334	1.1364699540857959 0.37296227786687997	0.6215893063876224 1.2989029752760784E12	1.1364699540857959 1.5276916695858407E9	1.1364699540857959 0.005985262361633436	2.1969528245080667 8.595904950055204E11
0.6282359572696228 0.9042015534677352	1.1439019878974022 0.3729596196576024	0.6282359572696228 1.0484785728523661E12	1.1439019878974022 1.5277011838373268E9	1.1439019878974022 0.0059861609425785325	2.21545361647363 7.980850434498788E11
0.6349462436264526 0.8990003913945079	1.1504447482765077 0.37295740633848506	0.6349462436264526 8.617512990726094E11	1.1504447482765077 1.527710486078075E9	1.1504447482765077 0.005986911733953825	2.2339540439618113 7.413605748647513E11
0.6420438081699884 0.8936277595810997	1.157170556725718 0.37295509938152005	0.6420438081699884 6.991325130641868E11	1.157170556725718 1.5277203221074562E9	1.157170556725718 0.005987665097025418	2.2513269578962913 6.916370809675492E11
0.6491428225145134 0.8883567450352663	1.1641269817602664 0.3729526987867251	0.6491428225145134 5.651253353882048E11	1.1641269817602664 1.5277306919254704E9	1.1641269817602664 0.005988421031794199	2.268699399357846 6.451834419058752E11
0.6562618749818603 0.8831873477570076	1.1713391529349049 0.37295009736052886	0.6562618749818603 4.597297660446633E11	1.1713391529349049 1.52774123758215E9	1.1713391529349049 0.005989192984360402	2.286071624479314 6.019996576797295E11
0.6634193977765778 0.8781195677463272	1.1785281965147811 0.37294730255526165	0.6634193977765778 3.829458050335624E11	1.1785281965147811 1.5277513254312007E9	1.1785281965147811 0.005989964096072885	2.303443889403098 5.620857282891119E11
0.6705977012782032 0.873143070371202	1.1857354687895159 0.3729443143709217	0.6705977012782032 3.165169057133306E11	1.1857354687895159 1.527760955472622E9	1.1857354687895159 0.005990734366930871	2.3197562497045303 5.270881205955879E11
0.6777400562502309 0.8682416327271225	1.1936143288668946 0.372940747805365	0.6777400562502309 2.61087886459961E11	1.1936143288668946 1.5277705823680894E9	1.1936143288668946 0.005991588661194868	2.3360685382495427 4.943584365693918E11
0.6848650987044613 0.8634152548140888	1.2023020425377091 0.372936263311483	0.6848650987044613 2.166587472734535E11	1.2023020425377091 1.5277800000219083E9	1.2023020425377091 0.005992558171647676	2.3523809714143855 4.638966762105237E11
0.6919916004722169 0.8586639366320954	1.2118203517234198 0.37293086088927385	0.6919916004722169 1.832294881538082E11	1.2118203517234198 1.527789208434078E9	1.2118203517234198 0.005993642898289408	2.3686937655695517 4.3570283951898364E11
0.6992454433742636 0.8538581589227379	1.2214203552421659 0.372924723289354	0.6992454433742636 1.533729105203054E11	1.2214203552421659 1.5277970801078165E9	1.2214203552421659 0.005994771151609734	2.384010226257351 4.109710372127282E11
0.7064250904385192 0.8491530802016412	1.23194580891353 0.3729168405322474	0.7064250904385192 1.2827364217577956E11	1.23194580891353 1.5278038782125502E9	1.23194580891353 0.005996058780823098	2.399326931138888 3.878334782812702E11
0.7135491705061373 0.844548700468807	1.2434060099769888 0.37290721261795934	0.7135491705061373 1.0793168312023068E11	1.2434060099769888 1.5278096027482781E9	1.2434060099769888 0.005997505785929612	2.4146440626985304 3.662901627246096E11
0.7206367505850673 0.8400450197242391	1.255189679089103 0.37289579727453326	0.7206367505850673 9.234703335365877E10	1.255189679089103 1.5278133402858396E9	1.255189679089103 0.005999049899400476	2.429961803405397 3.463410905427464E11
0.7300106846041455 0.834409840709891	1.2679869306426157 0.37288088609087655	0.7300106846041455 7.571494904064903E10	1.2679869306426157 1.527814456345826E9	1.2679869306426157 0.006000791364370261	2.4443286592747695 3.288636190831101E11
0.7393847178349824 0.8288327307547823	1.2818020025044374 0.3728624790669981	0.7393847178349824 6.18357093449834E10	1.2818020025044374 1.5278129509282367E9	1.2818020025044374 0.006002730180839521	2.4586960011991468 3.125230820522238E11
0.7487593212136591 0.8233136898589022	1.2977498900108475 0.3728356829006474	0.7487593212136591 5.070931426666184E10	1.2977498900108475 1.5278053046501644E9	1.2977498900108475 0.006005112812034085	2.4730639823761593 2.973194794500876E11
0.7581349655903393 0.8178527180222543	1.3121784592338983 0.3728059075716468	0.7581349655903393 4.233576380568437E10	1.3121784592338983 1.5277931761284971E9	1.3121784592338983 0.006007360695165719	2.487432755982991 2.8325281127670135E11
0.769485983442471 0.8112434631573775	1.3250877364742546 0.37277315308000336	0.769485983442471 3.3994343740995872E10	1.3250877364742546 1.527776565363234E9	1.3250877364742546 0.006009473830234756	2.5010981910601 2.707859698266142E11
0.7808354754924908 0.8046665773697468	1.338503843017002 0.3727320818166868	0.7808354754924908 2.713976310811758E10	1.338503843017002 1.5277531670037348E9	1.338503843017002 0.00601174315663977	2.5147643095424472 2.59171042751458E11
0.792184277273104 0.7981220606593586	1.3519194452300598 0.3726805516952245	0.792184277273104 2.177202190704949E10	1.3519194452300598 1.5277210409920118E9	1.3519194452300598 0.00601405838361213	2.5284312453582753 2.484080300512328E11
0.8035332244694737 0.791609913026222	1.36533647040572 0.3726185627156271	0.8035332244694737 1.78911201377916E10	1.36533647040572 1.5276801873280642E9	1.36533647040572 0.006016419511152503	2.542099132411801 2.3849693172593854E11
0.8175785314094757 0.7837075432720644	1.3764880685848375 0.3725532868565766	0.8175785314094757 1.4132503792984287E10	1.3764880685848375 1.5276350511222043E9	1.3764880685848375 0.006018443946744333	2.5551044352888805 2.2975898336808337E11
0.8316238734312292 0.7759507861240396	1.3876282016219708 0.3724740031589766	0.8316238734312292 1.1134507090913752E10	1.3876282016219708 1.5275789104070704E9	1.3876282016219708 0.006020417164245283	2.568110578284766 2.2167824483400595E11
0.8456696445669197 0.7683396415821457	1.398791391520751 0.37238071162283237	0.8456696445669197 8.897130031579994E9	1.398791391520751 1.527511765182662E9	1.398791391520751 0.006022339163655354	2.581117678538567 2.1425471612370627E11
0.8597162388126209 0.7608741096463847	1.4088475541580183 0.3722824401015492	0.8597162388126209 7.420372614983016E9	1.4088475541580183 1.52744027574864E9	1.4088475541580183 0.006023939166432623	2.5941258531635314 2.074883972371843E11
0.8750135066481364 0.7529652778814606	1.419868352944137 0.3721608219322734	0.8750135066481364 6.100030050876132E9	1.419868352944137 1.5273516438747764E9	1.419868352944137 0.006025427965335005	2.606503027000139 2.015890819728561E11
0.8903097982825307 0.7453830305483207	1.4318868813267065 0.3720158571150014	0.8903097982825307 5.059137491311049E9	1.4318868813267065 1.5272458695610704E9	1.4318868813267065 0.006026805560362502	2.6188811615818395 1.9620507904391083E11
0.9056056225963656 0.7381273676469684	1.4451062049494128 0.3718420122480941	0.9056056225963656 4.297694936287769E9	1.4451062049494128 1.5271189976632931E9	1.4451062049494128 0.006027908142097859	2.631260359256541 1.9133638845034845E11
0.9209014885168452 0.731198289177402	1.4583255181296018 0.37164646148872205	0.9209014885168452 3.81570238580629E9	1.4583255181296018 1.5269765935546055E9	1.4583255181296018 0.00602865360737903	2.6436407223457863 1.8698301019216898E11
0.9369019627349593 0.7243746198264107	1.4715451308854974 0.3714292048368888	0.9369019627349593 3.3737592639640574E9	1.4715451308854974 1.5268186572350066E9	1.4715451308854974 0.006029041956206459	2.6554201185701363 1.8326200497790833E11
0.9529024953617091 0.7180175976042156	1.485556492540748 0.37117568990135563	0.9529024953617091 3.0244416543209357E9	1.485556492540748 1.5266339663704824E9	1.485556492540748 0.006029106300385444	2.6672005647236685 1.7992963439452173E11
0.9689031761274349 0.7121272225108184	1.5016221248653123 0.37083262338459466	0.9689031761274349 2.767749556876924E9	1.5016221248653123 1.5263861706355913E9	1.5016221248653123 0.006028484579240433	2.678982150141427 1.7698589844200916E11
0.984904094759981 0.7067034945462174	1.5197438270381916 0.3704000052866112	0.984904094759981 2.603682971632023E9	1.5197438270381916 1.5260752700303328E9	1.5197438270381916 0.006027176792772203	2.6907649641325437 1.744307971203706E11
0.9995088265686878 0.7021661377952038	1.5366848674236893 0.36992498857982437	0.9995088265686878 2.4609328224564333E9	1.5366848674236893 1.5257364474877203E9	1.5366848674236893 0.00602507997488244	2.701982998087172 1.723054606771939E11
1.0141134705721633 0.6979884652599653	1.553219784628434 0.36937149381949386	1.0141134705721633 2.34478543594446E9	1.553219784628434 1.5253478464426863E9	1.553219784628434 0.006022035488977283	2.7132021455490496 1.704329511305032E11
1.0287180950034427 0.6941704769405037	1.5693524807136956 0.3687395210056339	1.0287180950034427 2.255240812096102E9	1.5693524807136956 1.52490946689523E9	1.5693524807136956 0.006018043335056954	2.72442248457943 1.688132684802985E11
1.0433227680958368 0.6907121728368191	1.5837032101539685 0.36806219000188367	1.0433227680958368 2.1922989509113607E9	1.5837032101539685 1.524446793870817E9	1.5837032101539685 0.006013293869393642	2.735644093214702 1.6744641272657974E11
1.05513435850813 0.6881531947204467	1.5976537442703578 0.3672790317290415	1.05513435850813 2.1421383522709575E9	1.5976537442703578 1.523925199916691E9	1.5976537442703578 0.0060073097562129965	2.746882704080255 1.662665070037683E11
1.0669458193024592 0.6857902309054333	1.6112133847470822 0.3663900461871181	1.0669458193024592 2.0996070051612875E9	1.6112133847470822 1.523344685032852E9	1.6112133847470822 0.0060000909955154605	2.7581225923316866 1.651884755278644E11
1.0787571865718524 0.6836232813917791	1.6228892089274882 0.3654765130274624	1.0787571865718524 2.0647049095823512E9	1.6228892089274882 1.5227630119553359E9	1.6228892089274882 0.005992267766783409	2.7693638373304306 1.642123182988681E11
1.0905684964101974 0.6816523461794857	1.6342883363715195 0.36444461199826517	1.0905684964101974 2.0374320655341487E9	1.6342883363715195 1.5221274687116911E9	1.6342883363715195 0.005983037149536074	2.7806065184091913 1.633380353167794E11
1.0993732465152677 0.68030179329529	1.6454565310984532 0.363294343099521	1.0993732465152677 2.0177167380976348E9	1.6454565310984532 1.5214380553019173E9	1.6454565310984532 0.005972399143773676	2.792222561667238 1.6243308784082266E11
1.1081781022770725 0.6790420557140981	1.654914119123633 0.3621709085232583	1.1081781022770725 2.0003276155550208E9	1.654914119123633 1.5207869874748712E9	1.654914119123633 0.005961674596152377	2.8038401466368748 1.614047042110059E11
1.1169832418890429 0.6778731334359138	1.6643428407363665 0.3609319446168291	1.1169832418890429 1.9852646979063067E9	1.6643428407363665 1.5200965850962944E9	1.6643428407363665 0.005949549547792476	2.8154593619072994 1.6025288442732904E11
1.1257888435273786 0.6767950264607334	1.673811914164039 0.35957745138022634	1.1257888435273786 1.9725279851514924E9	1.673811914164039 1.5193668481661863E9	1.673811914164039 0.0059360239986937504	2.827080296030421 1.5897762848979214E11
1.1331391695960813 0.6759582095390924	1.6825238130995603 0.358212602600843	1.1331391695960813 1.9624970865602355E9	1.6825238130995603 1.5186599184317033E9	1.6825238130995603 0.005922114822760948	2.8390864070119304 1.5738971948340143E11
1.1404893619870635 0.6751766216610742	1.691474050104035 0.35671959534628517	1.1404893619870635 1.9534922151238775E9	1.691474050104035 1.5179221901371336E9	1.691474050104035 0.005906636679044896	2.8510943672308553 1.5548605793318243E11
1.147839524350751 0.6744502628266789	1.7007337676642496 0.35509842961656	1.147839524350751 1.9455133708424182E9	1.7007337676642496 1.5171536632824771E9	1.7007337676642496 0.005889589567546038	2.863104275575868 1.5326664383913525E11
1.1551897603388384 0.6737791330359046	1.7105042806952402 0.3533104689102222	1.1551897603388384 1.9385605537158585E9	1.7105042806952402 1.5163458561760004E9	1.7105042806952402 0.005870501774092206	2.8751162308875293 1.507314772012599E11
1.1618658748550452 0.6732148072151274	1.7208457691069547 0.351352653231344	1.1618658748550452 1.9328139778623192E9	1.7208457691069547 1.5155133439842284E9	1.7208457691069547 0.005849311885784191	2.88752549028129 1.477222132792004E11
1.1685417237820903 0.6726960408571534	1.7318263763249468 0.34922498257993606	1.1685417237820903 1.9277648091250257E9	1.7318263763249468 1.51465612670716E9	1.7318263763249468 0.005826019902622658	2.899936956040771 1.4439370134233752E11
1.1752173847736516 0.6722228339619845	1.7434720636061918 0.3469278486421983	1.1752173847736516 1.9234130475039783E9	1.7434720636061918 1.5137883220170317E9	1.7434720636061918 0.005800555392383221	2.912350738546235 1.4074594139067123E11
1.1818929354899685 0.6717951865296188	1.7560007325450397 0.344404939904039	1.1818929354899685 1.9197586929991763E9	1.7560007325450397 1.512903013131996E9	1.7560007325450397 0.005772265614685356	2.924766948116156 1.367789334242015E11
1.1876805482447241 0.6714766323479955	1.7694602454944737 0.34165625636546704	1.1876805482447241 1.9173200554106889E9	1.7694602454944737 1.512000200052052E9	1.7694602454944737 0.005741150569529173	2.937592906210639 1.323968538710088E11
1.1935018970361724 0.6711792686965738	1.7850011012115277 0.3384777943633237	1.1935018970361724 1.9152135367807062E9	1.7850011012115277 1.5110525163747888E9	1.7850011012115277 0.005704746785521574	2.9504214846814576 1.277809660841794E11
1.1993738467210944 0.6709030955753557	1.7999830279370173 0.33536542969886707	1.1993738467210944 1.9134391371092277E9	1.7999830279370173 1.5101950163285341E9	1.7999830279370173 0.00566877831358381	2.963252806725061 1.229312700637133E11
1.2053128310998138 0.6706481129843356	1.814426069486295 0.3323191623721007	1.2053128310998138 1.9119968563962538E9	1.814426069486295 1.5094276999132876E9	1.814426069486295 0.0056332451537158814	2.9760869954588918 1.178477658096105E11
1.2111605849044191 0.6704104441663956	1.8333235256199683 0.32821763753588673	1.2111605849044191 1.910766640291418E9	1.8333235256199683 1.5084980318377697E9	1.8333235256199683 0.0055849270663624875	2.9902866281905207 1.1216634831827235E11
1.2170083387090243 0.6701832410509789	1.8514006641762406 0.3241773800909966	1.2170083387090243 1.909688333611709E9	1.8514006641762406 1.5076710143876333E9	1.8514006641762406 0.005536903686010452	3.0044799813978287 1.0663273085873543E11
1.2228728945843694 0.6699665036380926	1.868714763103344 0.32019839003744277	1.2228728945843694 1.9087619363571265E9	1.868714763103344 1.5069466475628777E9	1.868714763103344 0.005489175012660218	3.0186686738552697 1.0124691343099974E11
1.228770911007421 0.6697602319277278	1.8897795878341441 0.3152407080895925	1.228770911007421 1.9079874485276709E9	1.8897795878341441 1.5061515115391808E9	1.8897795878341441 0.0054291332849174525	3.0328543259328598 9.600889603506529E10
1.2346689274304739 0.6695604518033873	1.9099653532979661 0.310404772013924	1.2346689274304739 1.9072977231978168E9	1.9099653532979661 1.505461975680673E9	1.9099653532979661 0.00537008406915218	3.0493347276675866 9.025956916167073E10
1.2405334833058201 0.6693662711945096	1.929392436288378 0.3056905818104516	1.2405334833058201 1.9066701127394645E9	1.929392436288378 1.5048780399873528E9	1.929392436288378 0.0053120273653648456	3.065794998914929 8.479461677946042E10
1.2463812371104268 0.6691776901010948	1.951440712912056 0.30038937234118546	1.2463812371104268 1.906104617152614E9	1.951440712912056 1.5043039184092042E9	1.951440712912056 0.005246187135885204	3.082235784073043 7.961403888843436E10
1.2522289909150326 0.6689947085231447	1.9728903099368413 0.2953095011921798	1.2522289909150326 1.9056012364372652E9	1.9728903099368413 1.5038153416956053E9	1.9728903099368413 0.005182677376850075	3.0986577298339917 7.471783548859256E10
1.258167975293754 0.6688104526441068	1.9938943482087321 0.2904509683634311	1.258167975293754 1.9050940552508926E9	1.9938943482087321 1.503412309846555E9	1.9938943482087321 0.005121498088259679	3.1178065738514533 6.946648252662404E10
1.2640399249786787 0.6686275542177311	2.017989008441195 0.2852099474853107	1.2640399249786787 1.9045693394362123E9	2.017989008441195 1.503029635648733E9	2.017989008441195 0.005055070003669337	3.136896346453635 6.458459471302216E10
1.2698612737701296 0.6684460132440142	2.0417870063166936 0.2803460026179634	1.2698612737701296 1.9040270889932244E9	2.0417870063166936 1.5027113543292959E9	2.0417870063166936 0.004993149711488897	3.155927070252443 6.007217204778695E10
1.2756488865248878 0.6682658297229578	2.0654100734811442 0.2758591337613998	1.2756488865248878 1.9034673039219286E9	2.0654100734811442 1.5024574658882437E9	2.0654100734811442 0.004935737211718804	3.174898768070923 5.592921453091839E10
1.2826545010023094 0.6680379647551407	2.088672178585593 0.27190480665829764	1.2826545010023094 1.902607973937191E9	2.088672178585593 1.5022531160130663E9	2.088672178585593 0.004885004020617755	3.194773263262921 5.198214795741141E10
1.2896851244677174 0.6678059324021062	2.111680942374133 0.2683591114767294	1.2896851244677174 1.9016733526054924E9	2.111680942374133 1.5020841815841773E9	2.111680942374133 0.004839489701907839	3.2145436726350525 4.833285333841126E10
1.296752515734372 0.667569732663849	2.1344656370438244 0.2652220482167076	1.296752515734372 1.9006634399268327E9	2.1344656370438244 1.5019506626015763E9	2.1344656370438244 0.004799194255589278	3.2342125088683993 4.498133067391795E10
1.3038682513405613 0.6673293655403691	2.1537436606963665 0.2628941072958968	1.3038682513405613 1.8995782359012117E9	2.1537436606963665 1.5018557910646334E9	2.1537436606963665 0.004769380025454572	3.2537823237687613 4.192757996393148E10
1.3116839363306376 0.6670637869940856	2.172656876453601 0.26084315922296053	1.3116839363306376 1.8983276395110822E9	2.172656876453601 1.5017764369798408E9	2.172656876453601 0.004743228481834504	3.2726800495244897 3.919728877346394E10
1.3194983052957965 0.6667959790341316	2.1912053316453335 0.259069203997913	1.3194983052957965 1.8970193783664384E9	2.1912053316453335 1.5017126003471978E9	2.1912053316453335 0.00472073962472963	3.2914648351994575 3.660285049072364E10
1.32732734957214 0.6665259416605069	2.2071648168560554 0.2577305424988898	1.32732734957214 1.8956534524672804E9	2.2071648168560554 1.501665368741631E9	2.2071648168560554 0.0047039423159549445	3.3101454936687693 3.4144265115710583E10
1.3351869709202735 0.6662536748732135	2.222699966422668 0.256561088645193	1.3351869709202735 1.8942298618136084E9	2.222699966422668 1.5016254735890234E9	2.222699966422668 0.004689434361979771	3.3287309859333454 3.1821532648424763E10
1.342832646911478 0.6659869208290816	2.2378203675334323 0.2555608424368243	1.342832646911478 1.892784821574229E9	2.2378203675334323 1.5015929148893747E9	2.2378203675334323 0.004677215762804553	3.346239326865925 2.9535930819787807E10
1.3504477416173286 0.6657194034647249	2.2509534391508175 0.25479364029965357	1.3504477416173286 1.891296796071522E9	2.2509534391508175 1.5015682873940582E9	2.2509534391508175 0.004668047228026494	3.3643373179627654 2.729670472914027E10
1.3580468770791718 0.665451122780147	2.2637078783627427 0.25412088059819116	1.3580468770791718 1.889765785305487E9	2.2637078783627427 1.5015472297397292E9	2.2637078783627427 0.004660187258109349	3.3830325242469903 2.5103854376482147E10
1.3656447674789853 0.6651820787753442	2.2761154155093806 0.25354256333245484	1.3656447674789853 1.8881917892761238E9	2.2761154155093806 1.5015297419263866E9	2.2761154155093806 0.004653635853053228	3.4023318084569465 2.295737976181344E10
1.3723238746162492 0.6649440994589009	2.286805488027731 0.2530955455041033	1.3723238746162492 1.8867648901989505E9	2.286805488027731 1.5015164506839943E9	2.286805488027731 0.004648768113515111	3.4197629894914297 2.1187005197383053E10
1.3789603353333233 0.6647080750384449	2.297274078445332 0.25269577907958496	1.3789603353333233 1.8853366226119685E9	2.297274078445332 1.5015048483345602E9	2.297274078445332 0.0046445826537776505	3.437602960360939 1.9511998559074493E10
1.3855637395543083 0.6644740055139744	2.307574518521621 0.25234326405891405	1.3855637395543083 1.8839069865151777E9	2.307574518521621 1.5014949348780842E9	2.307574518521621 0.004641079473841513	3.4558547884277826 1.793235984688776E10
1.3921438217361977 0.6642418908855019	2.316257034338052 0.2520717958470309	1.3921438217361977 1.8824759819085782E9	2.316257034338052 1.5014874935453181E9	2.316257034338052 0.0046385574670696475	3.474521338021293 1.6448089060822851E10
1.3984092930900331 0.6640285539151973	2.324923331178018 0.2518354077321936	1.3984092930900331 1.8811982636736002E9	2.324923331178018 1.5014813014476023E9	2.324923331178018 0.004636614260331239	3.4919826590716756 1.5182424553006523E10
1.4047500804558863 0.6638098584207954	2.333627805268583 0.251634099714404	1.4047500804558863 1.879855448791074E9	2.333627805268583 1.501476358584936E9	2.333627805268583 0.004635249853626621	3.509746143041913 1.3995413355803007E10
1.4111913335738482 0.6635858044022998	2.342442505797134 0.2514304376381391	1.4111913335738482 1.8784475372609997E9	2.342442505797134 1.5014713850450072E9	2.342442505797134 0.0046338696239374135	3.5278133752339342 1.2887055469212301E10
1.4177570477937778 0.663356391859705	2.351238531139446 0.25118784527327787	1.4177570477937778 1.8769745290833776E9	2.351238531139446 1.5014651948020272E9	2.351238531139446 0.0046318677437580105	3.5461858623215106 1.1857350893234404E10
1.4240758641462525 0.6631316451747731	2.36007849319283 0.2509063226198256	1.4240758641462525 1.8754798362124667E9	2.36007849319283 1.5014577878559957E9	2.36007849319283 0.004629244213088634	3.5650172397717643 1.0896309767543093E10
1.4304191286461112 0.6628972948127574	2.3706451399393793 0.2505316168409424	1.4304191286461112 1.873860090926858E9	2.3706451399393793 1.5014477181223562E9	2.3706451399393793 0.00462549246199273	3.584112167310555 1.0003822776019285E10
1.4368114234414822 0.662653340773665	2.3813816845629314 0.250097413011642	1.4368114234414822 1.8721152932265513E9	2.3813816845629314 1.5014359807074697E9	2.3813816845629314 0.004620895531746826	3.603471809005413 9.179889918662981E9
1.4432767714447672 0.6623997830574853	2.3923413411329353 0.2496037111319298	1.4432767714447672 1.870245443111547E9	2.3923413411329353 1.5014225756113358E9	2.3923413411329353 0.004615453422351256	3.623097281820072 8.424511195474181E9
1.4496707267066244 0.6621399502419374	2.4052358722975153 0.2489394613864091	1.4496707267066244 1.8682618655688722E9	2.4052358722975153 1.5014043516674106E9	2.4052358722975153 0.004607832767062669	3.6436693324354295 7.709803438854681E9
1.4560403133662017 0.6618659751775811	2.4183857099614507 0.24815003985745587	1.4560403133662017 1.8661065299107814E9	2.4183857099614507 1.5013829487153168E9	2.4183857099614507 0.004598479707687563	3.6644731110829833 7.054118838755957E9
1.4624098534630454 0.6615778578644198	2.431816566957246 0.24723544654508434	1.4624098534630454 1.8637794361372743E9	2.431816566957246 1.5013583667550542E9	2.431816566957246 0.004587394244226272	3.685509572047508 6.457457395178008E9
1.468803669568076 0.6612755983024501	2.4475812217984 0.24597135495843236	1.468803669568076 1.861280584248351E9	2.4475812217984 1.5013246046837401E9	2.4475812217984 0.0045717237985670725	3.7067796382958167 5.919819108120835E9
1.4752691724046416 0.6609535985755146	2.4634734341296958 0.24445640441429628	1.4752691724046416 1.8585478717588286E9	2.4634734341296958 1.5012855698459854E9	2.4634734341296958 0.0045526063426489785	3.7286067758622115 5.427039084372413E9
1.4816615276587008 0.6606090621141876	2.4794959749662437 0.24269059491268496	1.4816615276587008 1.8555767073498967E9	2.4794959749662437 1.501241262241789E9	2.4794959749662437 0.004530041876472323	3.750617998154538 4.980327410742289E9
1.4880047578538762 0.660241988918469	2.495281554618922 0.24061958785456472	1.4880047578538762 1.852367091021555E9	2.495281554618922 1.501191079399727E9	2.495281554618922 0.004503268730427833	3.7728140693646273 4.579684087230462E9
1.4943234458327437 0.6598523789883606	2.510887863844424 0.23820950173401823	1.4943234458327437 1.8489190227738035E9	2.510887863844424 1.5011360147278671E9	2.510887863844424 0.004471824902350762	3.7951957347500684 4.225109113836934E9
1.5008764231197085 0.6594183958000892	2.5263227374952884 0.23546033655105436	1.5008764231197085 1.8450070601107295E9	2.5263227374952884 1.5010760682262092E9	2.5263227374952884 0.004435710392241775	3.816394470306377 3.925872520984481E9
1.5073054076844303 0.6589300965827141	2.539344368203715 0.23274085662118527	1.5073054076844303 1.8406034979645824E9	2.539344368203715 1.5010203358804736E9	2.539344368203715 0.004399754700910029	3.8377074567740057 3.6556380038920665E9
1.5136342592707008 0.6583874813362316	2.552090007931151 0.22970459098583706	1.5136342592707008 1.8357083363353624E9	2.552090007931151 1.5009623509717658E9	2.552090007931151 0.004359397025172184	3.859135201084381 3.4144055625596914E9
1.519887983835015 0.6577905500606489	2.5645948886005394 0.22635153964502575	1.519887983835015 1.8303215752230697E9	2.5645948886005394 1.500902113500086E9	2.5645948886005394 0.004314637365028905	3.8806782020677817 3.202175196987356E9
1.5261365188821059 0.6570335528720408	2.575173839910841 0.22312144357692265	1.5261365188821059 1.823407992199699E9	2.575173839910841 1.50084834820483E9	2.575173839910841 0.004271329791401878	3.9011198792888515 3.0220495713928437E9
1.5324604859157258 0.6561333159617879	2.5855802140585995 0.21961229856062214	1.5324604859157258 1.8154536257678678E9	2.5855802140585995 1.500794327650618E9	2.5855802140585995 0.004224102234531845	3.9216220820746717 2.8594824543224435E9
1.5388850302353343 0.6550898393298903	2.595874968365654 0.2158241045961402	1.5388850302353343 1.8064584759275763E9	2.595874968365654 1.5007400518374498E9	2.595874968365654 0.004172954694419916	3.9421851679556603 2.714473845776155E9
1.545434138743494 0.6539031229763461	2.6045911042065173 0.21230191101867835	1.545434138743494 1.796422542678825E9	2.6045911042065173 1.5006936041391885E9	2.6045911042065173 0.0041252338156874116	3.9628094912959404 2.5870237457539783E9
1.551742652021999 0.6526041293641951	2.613327373090056 0.20854939461022237	1.551742652021999 1.7857953059086487E9	2.613327373090056 1.5006479452319117E9	2.613327373090056 0.004074245953627375	3.982485081033413 2.4776359802787485E9
1.5580757315965532 0.6511657362060985	2.6221489011890093 0.20456655537077406	1.5580757315965532 1.7745951596185515E9	2.6221489011890093 1.5006030751156185E9	2.6221489011890093 0.004019991108240028	4.002179550425369 2.3786912413168287E9
1.5644580317377335 0.6495879435020582	2.6305292467894903 0.20058240183878606	1.5644580317377335 1.762822103808533E9	2.6305292467894903 1.5005619006230729E9	2.6305292467894903 0.003965561960058594	4.02189316823434 2.290189528868219E9
1.5709136428140353 0.6478707512520723	2.6391346864872887 0.1963672306528883	1.5709136428140353 1.7504761384785933E9	2.6391346864872887 1.5005219831581395E9	2.6391346864872887 0.003907833670585003	4.041626202440452 2.212130842932919E9
1.5772975037279178 0.6460206736868139	2.648030091716998 0.19192104181309322	1.5772975037279178 1.7379185132333481E9	2.648030091716998 1.5004833227208183E9	2.648030091716998 0.003846806239819366	4.060463042819986 2.1445779168998756E9
1.5836569725206955 0.6440675023216889	2.6575978184867175 0.18706752077110256	1.5836569725206955 1.725425421252353E9	2.6575978184867175 1.5004450485887673E9	2.6575978184867175 0.003780015730646457	4.079285640026862 2.0831832038402305E9
1.5900164413134732 0.6420112371566935	2.667672849366859 0.18194748185123455	1.5900164413134732 1.7129968625356076E9	2.667672849366859 1.5004085098384588E9	2.667672849366859 0.0037093915989070405	4.098094205147295 2.027946703753984E9
1.5964003022273558 0.6398518781918296	2.6783210921834617 0.1765609250534963	1.5964003022273558 1.7006328370831122E9	2.6783210921834617 1.5003737064698915E9	2.6783210921834617 0.0036349338446015613	4.1168889497402885 1.978868416641136E9
1.6028559133036697 0.6375710946611077	2.6906691527926867 0.17045225629275418	1.6028559133036697 1.6885189981577542E9	2.6906691527926867 1.500338788210222E9	2.6906691527926867 0.00355028541763902	4.1349113170706016 1.9358750872342544E9
1.6092382134448613 0.6352693946601926	2.702988235034043 0.16447938739592782	1.6092382134448613 1.6770283960246737E9	2.702988235034043 1.5003080265320888E9	2.702988235034043 0.0034673559871249973	4.152892671124865 1.8965932633198717E9
1.6155712930194268 0.6329467781890807	2.7153300558708637 0.15864231836303322	1.6155712930194268 1.6661610306838706E9	2.7153300558708637 1.5002814214354908E9	2.7153300558708637 0.0033861455530599374	4.1708331864744 1.8610229448979874E9
1.6218798062979425 0.6306032452477757	2.7272069352521253 0.15323143502653114	1.6218798062979425 1.6559169021353447E9	2.7272069352521253 1.5002590257473915E9	2.7272069352521253 0.0033107439330480872	4.188733038885388 1.829164131968602E9
1.628428914806089 0.6281879641671244	2.739828323186398 0.147700902828384	1.628428914806089 1.6461549120026522E9	2.739828323186398 1.5002382839994037E9	2.739828323186398 0.0032335760462905974	4.205973150073653 1.8009660830248828E9
1.6348534591256847 0.6258682718588551	2.75321619230391 0.14205072176860423	1.6348534591256847 1.637289205336655E9	2.75321619230391 1.500219196191527E9	2.75321619230391 0.003154641892787912	4.223149864216972 1.775088147178188E9
1.6411774261592915 0.623644168322973	2.7635958530384324 0.13785909185497136	1.6411774261592915 1.6293197821373527E9	2.7635958530384324 1.500206165290777E9	2.7635958530384324 0.003096032474914078	4.240263332863917 1.7515303244285173E9
1.6474259612063697 0.6215156535594781	2.774443636505322 0.13368620558197453	1.6474259612063697 1.6222466424047456E9	2.774443636505322 1.500194059188185E9	2.774443636505322 0.0030376757274860324	4.257313709249495 1.7302926147758703E9
1.653911537720245 0.6195032491041959	2.7857659986587944 0.12953206294962438	1.653911537720245 1.6159216681883478E9	2.7857659986587944 1.5001828778837495E9	2.7857659986587944 0.0029795716505044414	4.273804192950506 1.7113402091725714E9
1.66039711423412 0.617569332015754	2.795017940518377 0.1263385830318482	1.66039711423412 1.6101278161659765E9	2.795017940518377 1.500174789945452E9	2.795017940518377 0.002934930518818434	4.290211852758369 1.6938949097640207E9
1.6668826907479954 0.6157139022941562	2.8037689601041933 0.12341013015954072	1.6668826907479954 1.6048650863376322E9	2.8037689601041933 1.5001676898460128E9	2.8037689601041933 0.0028940064187058514	4.3065368264407144 1.677956716550218E9
1.6733682672618706 0.613936959939406	2.8120190790592776 0.1207467043326984	1.6733682672618706 1.6001334787033143E9	2.8120190790592776 1.500161577585431E9	2.8120190790592776 0.0028567993501671376	4.322779253869197 1.6635256295311637E9
1.6811674496769733 0.6118723431030118	2.8196638150833393 0.11835751680278239	1.6811674496769733 1.594910295949317E9	2.8196638150833393 1.5001562832782745E9	2.8196638150833393 0.0028234425069714178	4.338939095688727 1.6502665462364113E9
1.688966632092076 0.6098717099673729	2.826870767949883 0.11617191197840437	1.688966632092076 1.590092294991948E9	2.826870767949883 1.500151596170701E9	2.826870767949883 0.0027929505725972073	4.354993271382073 1.6380613823625638E9
1.696765814507179 0.6079350605324931	2.8336400002830016 0.11418988985956258	1.696765814507179 1.5856794758312068E9	2.8336400002830016 1.5001475162627094E9	2.8336400002830016 0.002765323547044617	4.370941921889416 1.6269101379096208E9
1.7045649969222816 0.6060623947983723	2.839996467654582 0.11239021859079568	1.7045649969222816 1.581671838467094E9	2.839996467654582 1.5001439020942614E9	2.839996467654582 0.002740265955639142	4.386785190967162 1.6168128128775823E9
1.713740085631123 0.6039275527769208	2.8459609175214924 0.11075479291857437	1.713740085631123 1.5773442077501147E9	2.8459609175214924 1.5001406962494612E9	2.8459609175214924 0.0027175237565073554	4.403410554630725 1.6070618863738317E9
1.722915174339964 0.6018549777014615	2.8515335070627317 0.10928361284290222	1.722915174339964 1.5733493626987474E9	2.8515335070627317 1.5001378987283082E9	2.8515335070627317 0.0026970969496494792	4.4198916319510335 1.5981274761834056E9
1.732090263048805 0.5998446695719908	2.8568271783399672 0.1079374901219099	1.732090263048805 1.5696873033129919E9	2.8568271783399672 1.5001353851399355E9	2.8568271783399672 0.002678440865670261	4.436228598576925 1.590009582306304E9
1.7412653517576462 0.597896628388507	2.861763276039193 0.1067266665831541	1.7412653517576462 1.5663580295928485E9	2.861763276039193 1.5001331641305711E9	2.861763276039193 0.0026616925775015945	4.452421634846823 1.582708204742527E9
1.7515067205591492 0.595783309445225	2.866342181664242 0.1056511422266384	1.7515067205591492 1.5629323793630357E9	2.866342181664242 1.5001312357002144E9	2.866342181664242 0.00264685208514348	4.469565566853801 1.5756268663977761E9
1.7617480893606523 0.5937233184068083	2.870759941875219 0.10465763512159487	1.7617480893606523 1.5597563433574164E9	2.870759941875219 1.500129478373348E9	2.870759941875219 0.002633183020543272	4.486512701979494 1.5691754390465717E9
1.7719894581621554 0.5917166552732533	2.8748448255819516 0.10377609022876033	1.7719894581621554 1.5568299215759904E9	2.8748448255819516 1.5001279397170825E9	2.8748448255819516 0.002621090780969059	4.503263276317583 1.563353922688914E9
1.7822308269636584 0.5897633200445602	2.8785977949706063 0.10300650754813123	1.7822308269636584 1.5541531140187578E9	2.8785977949706063 1.5001266197314174E9	2.8785977949706063 0.002610575366420841	4.519817534371687 1.558162317324803E9
1.7931413987161318 0.5877294975378087	2.882291614772908 0.10228669368070609	1.7931413987161318 1.5515019564955547E9	2.882291614772908 1.5001253978240879E9	2.882291614772908 0.0026007846987610153	4.537524604599185 1.5530948911808913E9
1.804051970468605 0.5857346161148689	2.885671575410402 0.10165775026668822	1.804051970468605 1.549025255777103E9	2.885671575410402 1.5001243412933128E9	2.885671575410402 0.0025922689560629033	4.554960267411136 1.5485076617281053E9
1.8149625422210787 0.5837786757757408	2.8887403244073027 0.1011196773060794	1.8149625422210787 1.5467230118634028E9	2.8887403244073027 1.5001234501390915E9	2.8887403244073027 0.0025850281383266163	4.572124872032345 1.544400628966445E9
1.825873113973552 0.5818616765204263	2.8915385460882734 0.10065598293066369	1.825873113973552 1.5445952247544537E9	2.8915385460882734 1.50012268784963E9	2.8915385460882734 0.002578832644757111	4.589018784497274 1.54077379289591E9
1.8368967124712257 0.5799550413085148	2.8943337265663325 0.1002134794465741	1.8368967124712257 1.542575961840948E9	2.8943337265663325 1.5001219671223726E9	2.8943337265663325 0.0025729566422790775	4.607360083114725 1.537192416549704E9
1.8479203109688993 0.5780720626218327	2.8971334955895234 0.09979216685381065	1.8479203109688993 1.540671550873286E9	2.8971334955895234 1.5001212879573183E9	2.8971334955895234 0.0025674001308925156	4.625316141292831 1.5339752208184693E9
1.858943909466573 0.5762127404603747	2.8996385158539177 0.09943953861439336	1.858943909466573 1.5388819918514674E9	2.8996385158539177 1.5001207245637317E9	2.8996385158539177 0.0025628016425754954	4.642887550601839 1.5311222057022054E9
1.8699675079642466 0.574377074824139	2.9021336606847563 0.09909283624025189	1.8699675079642466 1.537207284775492E9	2.9021336606847563 1.5001201742393887E9	2.9021336606847563 0.0025582934002240645	4.660074942329551 1.5286333712009122E9
1.8821364912365963 0.5723708702872523	2.9046416853266974 0.09875205973138979	1.8821364912365963 1.5354631583384602E9	2.9046416853266974 1.50011963698429E9	2.9046416853266974 0.002553875403838556	4.679181808555877 1.5261226564691577E9
1.8943054745089458 0.5703801843744722	2.9071857098107783 0.09840214231983513	1.8943054745089458 1.5338138701086695E9	2.9071857098107783 1.500119086168586E9	2.9071857098107783 0.0025493208000548764	4.697709952722237 1.5239001105156107E9
1.9064744577812955 0.5684050170858006	2.9097266348822064 0.09802720214937022	1.9064744577812955 1.5322594200861197E9	2.9097266348822064 1.500118497088999E9	2.9097266348822064 0.0025443867691509183	4.715660610118331 1.5219657333402708E9
1.9186434410536453 0.5664453684212392	2.912289017263282 0.09762723922000216	1.9186434410536453 1.5307998082708104E9	2.912289017263282 1.500117869745528E9	2.912289017263282 0.002539073311127015	4.733035139208302 1.5203195249431381E9
1.931259347135204 0.5644249051953407	2.914972307491293 0.09715276904171422	1.931259347135204 1.529367558702205E9	2.914972307491293 1.5001171223394308E9	2.914972307491293 0.0025326660650206714	4.75015709301125 1.5188214655063639E9
1.943875253216763 0.5624134779356682	2.917867956967207 0.09657700275150649	1.943875253216763 1.5280089434294376E9	2.917867956967207 1.5001162209254296E9	2.917867956967207 0.002524804483188036	4.767414866069064 1.517435400723984E9
1.9564911592983218 0.5604110866422269	2.9209771701557155 0.09589994034938609	1.9564911592983218 1.5267239624525082E9	2.9209771701557155 1.5001151655035236E9	2.9209771701557155 0.0025154885656297745	4.784808651154402 1.5161613305959988E9
1.9691070653798806 0.5584177313150098	2.9241529935990287 0.09511918114956597	1.9691070653798806 1.5255126157714167E9	2.9241529935990287 1.5001139523300602E9	2.9241529935990287 0.002504657830816325	4.802338636552859 1.5149992551224082E9
1.981781613935248 0.5564222234464564	2.927651455646231 0.09417390104519807	1.981781613935248 1.524358475827322E9	2.927651455646231 1.5001125047139468E9	2.927651455646231 0.002491479081321412	4.818819987903154 1.513983048937348E9
1.9944561624906156 0.5544351670533301	2.931475297758246 0.09306410003628951	1.9944561624906156 1.5232619429724288E9	2.931475297758246 1.5001108226551821E9	2.931475297758246 0.0024759523171458122	4.835396644137066 1.5130321957058256E9
2.007130711045983 0.5524565621356272	2.935310012142474 0.09185740785229424	2.007130711045983 1.5222230172067366E9	2.935310012142474 1.5001090151397824E9	2.935310012142474 0.002459012124372605	4.852068761051635 1.5121466954278412E9
2.0198052596013505 0.5504864086933514	2.9395362412399235 0.09044375584903452	2.0198052596013505 1.5212416985302458E9	2.9395362412399235 1.5001069435239046E9	2.9395362412399235 0.0024391185018496344	4.86883649178299 1.511326548103395E9
2.0338107216481345 0.548320860304476	2.9441600207076353 0.08882314402651037	2.0338107216481345 1.5202179002496948E9	2.9441600207076353 1.5001046078075483E9	2.9441600207076353 0.002416271449576789	4.884689988540255 1.5105978851932776E9
2.0478161836949185 0.5461737402736366	2.948823301124037 0.08710578614539255	2.0478161836949185 1.5192516772816844E9	2.948823301124037 1.5001021805563877E9	2.948823301124037 0.0023920159735806292	4.900608668578081 1.5099105279192839E9
2.0618216457417025 0.5440450486008332	2.9539304834279276 0.08514743192455487	2.0618216457417025 1.518343029626214E9	2.9539304834279276 1.5000994914388638E9	2.9539304834279276 0.0023643122710181865	4.916592664294348 1.5092644762814138E9
2.075827107788487 0.5419347852860588	2.95948727543929 0.08294808136399912	2.075827107788487 1.5174919572832842E9	2.95948727543929 1.5000965404549751E9	2.95948727543929 0.002333160341889461	4.932642106470494 1.5086597302796674E9
2.089973239876801 0.5398287166261388	2.9651679156400728 0.08062306562910582	2.089973239876801 1.5166856865720525E9	2.9651679156400728 1.5000935042813296E9	2.9651679156400728 0.0023001820969027467	4.947884278286259 1.5081186170227199E9
2.104119371965116 0.5377612210356046	2.971339879684176 0.07801746367555484	2.104119371965116 1.5159299914422815E9	2.971339879684176 1.5000902218098617E9	2.971339879684176 0.002263169898451766	4.963168654580197 1.507606836716563E9
2.11826550405343 0.5357322985144615	2.9780076387090877 0.07513127550335508	2.11826550405343 1.515224871893971E9	2.9780076387090877 1.5000866930405707E9	2.9780076387090877 0.0022221237465364077	4.978495352319421 1.5071243893611965E9
2.1324116361417444 0.5337419490627004	2.9849547473715976 0.07203818117022553	2.1324116361417444 1.514570327927121E9	2.9849547473715976 1.5000830442328813E9	2.9849547473715976 0.002178072448861367	4.993864487504783 1.5066712749566205E9
2.1450417354509694 0.5320096991473884	2.9924497530680667 0.06858393576400967	2.1450417354509694 1.514025091461419E9	2.9924497530680667 1.5000791416326287E9	2.9924497530680667 0.0021287913889637125	5.008838635651408 1.5062558414657037E9
2.1576718347601944 0.5303423086625694	3.000496115540651 0.0647685392847146	2.1576718347601944 1.5135191431992064E9	3.000496115540651 1.5000749852398124E9	3.000496115540651 0.002074280566843888	5.023838033536869 1.5058634065438077E9
2.170301934069419 0.5287397776082416	3.0098161669210115 0.060082881421714696	2.170301934069419 1.5130524831404824E9	3.0098161669210115 1.5000701486141336E9	3.0098161669210115 0.0020071714209600735	5.038862795053954 1.505493970190932E9
2.182932033378644 0.5272021059844105	3.0189262318525705 0.05534871779654882	2.182932033378644 1.5126251112852476E9	3.0189262318525705 1.5000654991876924E9	3.0189262318525705 0.001939246460217702	5.05391303351963 1.505147532407077E9
2.195655142436171 0.5258015632339008	3.027855852977444 0.0505660484092223	2.195655142436171 1.5122484637876775E9	3.027855852977444 1.5000610369604888E9	3.027855852977444 0.0018705056846173287	5.0704971542509965 1.5047910100569105E9
2.2084885949426667 0.5244289010207206	3.0390200461295063 0.044532491362404336	2.2084885949426667 1.5118908474987175E9	3.0390200461295063 1.5000557435394845E9	3.0390200461295063 0.0017836491004182822	5.087093545034764 1.504457253359434E9
2.221487543710856 0.5230841193448681	3.049987486362447 0.0385844492073284	2.221487543710856 1.5115522624183674E9	3.049987486362447 1.5000508207025428E9	3.049987486362447 0.0016979071696436856	5.1037023700081345 1.5041462623146467E9
2.2347050700155155 0.5217672182063433	3.0607964322788965 0.03272192194399981	2.2347050700155155 1.5112327085466273E9	3.0607964322788965 1.5000462684496627E9	3.0607964322788965 0.001613279892293872	5.120323792939943 1.5038580369225495E9
2.2476257325332623 0.5204926322827292	3.072426284406406 0.026571903253510776	2.2476257325332623 1.510931033041899E9	3.072426284406406 1.500041783683652E9	3.072426284406406 0.001524420592062258	5.139023463790496 1.5035587816619701E9
2.260546395051009 0.519208344362661	3.083885532204818 0.020654451636759497	2.260546395051009 1.5106359734091754E9	3.083885532204818 1.500037707241197E9	3.083885532204818 0.0014388638353605146	5.157712983660286 1.503281753900345E9
2.273521918744981 0.5179143544461402	3.0951934852830716 0.01496956709376196	2.273521918744981 1.5103475296484566E9	3.0951934852830716 1.5000340391222978E9	3.0951934852830716 0.0013566096221894188	5.176392612376972 1.5030269536376743E9
2.286606474740638 0.5166106625331652	3.105331132714135 0.010100199908213092	2.286606474740638 1.5100657017597423E9	3.105331132714135 1.5000310607049677E9	3.105331132714135 0.0012861543071503992	5.195062610181174 1.5027943808739579E9
2.299691030736294 0.5152892585366162	3.1152883802859983 0.005486817704063006	2.299691030736294 1.5097871409331846E9	3.1152883802859983 1.5000283699360456E9	3.1152883802859983 0.0012194087537050749	5.216159506771934 1.502554573268937E9
2.3126665544302654 0.51393369729412	3.1250671313350677 0.0011294204813259148	2.3126665544302654 1.5095104413056734E9	3.1250671313350677 1.500025966815531E9	3.1250671313350677 0.0011563729618542231	5.237206563476901 1.5023352304477062E9
2.3255872169480116 0.5125439788056765	3.133494663601908 -0.0024430620686457525	2.3255872169480116 1.509235602877208E9	3.133494663601908 1.500024077435379E9	3.133494663601908 0.0011047326600289722	5.2582042146291705 1.5021363524102654E9
2.3385078794657574 0.5111201030712893	3.1417280283148092 -0.005806212521345167	2.3385078794657574 1.508962625647789E9	3.1417280283148092 1.5000223661870034E9	3.1417280283148092 0.0010561484903828236	5.279152897634842 1.5019579391566145E9
2.3517254057704187 0.5096029473047414	3.1497678866430783 -0.008960030876756342	2.3517254057704187 1.5086788433622644E9	3.1497678866430783 1.5000208330704036E9	3.1497678866430783 0.0010106204529162213	5.299772388489084 1.501797560280237E9
2.36472435453861 0.5079801409620748	3.1567587800103856 -0.011576000720235236	2.36472435453861 1.5083879986882484E9	3.1567587800103856 1.5000196027246196E9	3.1567587800103856 9.729062968667481E-4	5.320305789527662 1.50165091531249E9
2.3775578070451076 0.5062516840432947	3.1635642722051305 -0.014042119990810953	2.3775578070451076 1.5080900916257412E9	3.1635642722051305 1.500018478935289E9	3.1635642722051305 9.373815406924493E-4	5.340753600025546 1.5015180042533736E9
2.390280916102637 0.5044175765483976	3.170190087112358 -0.016358388688483494	2.390280916102637 1.5077851221747427E9	3.170190087112358 1.5000174617024117E9	3.170190087112358 9.040461843931027E-4	5.361116325553509 1.501398827102888E9
2.403937254039965 0.5020729476893075	3.1759590618940057 -0.018299016873538854	2.403937254039965 1.507409232507679E9	3.1759590618940057 1.5000166316721222E9	3.1759590618940057 8.761551666197622E-4	5.3789324983227225 1.501302286185834E9
2.4176534924470525 0.49947913327695925	3.1815828918484006 -0.020153517987579583	2.4176534924470525 1.507021564323367E9	3.1815828918484006 1.50001585903011E9	3.1815828918484006 8.495138905267865E-4	5.396655472313216 1.5012131056574125E9
2.4314499549862734 0.49663613331136514	3.187074382687216 -0.021921892030605683	2.4314499549862734 1.5066221176218066E9	3.187074382687216 1.5000151437763746E9	3.187074382687216 8.241223561139535E-4	5.41428565756915 1.5011312855176237E9
2.44534661334455 0.4935439477925181	3.1917992421843095 -0.023411762048643148	2.44534661334455 1.5062108924029975E9	3.1917992421843095 1.5000145540086112E9	3.1917992421843095 8.027407431431257E-4	5.43182347064305 1.5010568257664676E9
2.461556077200797 0.4896582302426902	3.196446409588234 -0.024881426892220837	2.461556077200797 1.505737545139995E9	3.196446409588234 1.5000139852503226E9	3.196446409588234 7.816324664043908E-4	5.447207700687306 1.5009954804060092E9
2.477781934521533 0.4855597608075195	3.201033628373556 -0.02633088656133875	2.477781934521533 1.505282434086727E9	3.201033628373556 1.5000134375015078E9	3.201033628373556 7.607975258980817E-4	5.462501430749387 1.500938160380001E9
2.4940575716763744 0.4812485394870061	3.204883185443982 -0.027555582831076286	2.4940575716763744 1.5048455592431931E9	3.204883185443982 1.5000129831502094E9	3.204883185443982 7.431729180105142E-4	5.477704999773709 1.5008848656884432E9
2.510416070247961 0.4767245662811499	3.208724913928937 -0.028821966026703727	2.510416070247961 1.5044269206093938E9	3.208724913928937 1.500012523133964E9	3.208724913928937 7.249044391224304E-4	5.492818752770605 1.5008355963313355E9
2.5284644228226014 0.4715687685838441	3.212575099222841 -0.03013003614820864	2.5284644228226014 1.5040064418926988E9	3.212575099222841 1.500012057452771E9	3.212575099222841 7.059920892344964E-4	5.506882700919792 1.5007920763146214E9
2.5464429248839218 0.46639953874882334	3.2157184467615094 -0.03124338275225025	2.5464429248839218 1.5036244588730493E9	3.2157184467615094 1.5000116678140004E9	3.2157184467615094 6.898522943421517E-4	5.521655902202758 1.5007495916387255E9
2.5643964103625785 0.46121687677608225	3.2188959863229436 -0.03245732712005189	2.5643964103625785 1.5032809715504456E9	3.2188959863229436 1.5000112525318305E9	3.2188959863229436 6.721948047944118E-4	5.537138660690686 1.5007081423036485E9
2.5823699003978735 0.45602078266562796	3.2221181001329877 -0.03377186925161535	2.5823699003978735 1.5029759799248872E9	3.2221181001329877 1.500010811606261E9	3.2221181001329877 6.530196205919428E-4	5.553331240481701 1.5006677283093898E9
2.6026735626028388 0.450280638954319	3.22475739728525 -0.034953570929448396	2.6026735626028388 1.5026793623373122E9	3.22475739728525 1.5000104219046052E9	3.22475739728525 6.357240055361304E-4	5.567952642148323 1.5006337094546154E9
2.622765393945608 0.4447573758476713	3.2274435945899977 -0.036464710592617244	2.622765393945608 1.5024196522475533E9	3.2274435945899977 1.5000099391918848E9	3.2274435945899977 6.135043503371343E-4	5.5829117957095145 1.500600989639368E9
2.642706869986591 0.43945099334568827	3.230182261364462 -0.03830528824110768	2.642706869986591 1.5021968496556106E9	3.230182261364462 1.5000093634680986E9	3.230182261364462 5.863606549952874E-4	5.59820883042216 1.5005695688636477E9
2.66256086300799 0.43436149144836644	3.2328623651774717 -0.040380963345083565	2.66256086300799 1.5020109545614836E9	3.2328623651774717 1.5000087453363047E9	3.2328623651774717 5.556950996096202E-4	5.613843867163226 1.5005394471274545E9
2.6816049557280865 0.4297508716106977	3.2355280799222013 -0.042294638918636274	2.6816049557280865 1.5018547678848052E9	3.2355280799222013 1.500008195794882E9	3.2355280799222013 5.274433814974602E-4	5.628769974129443 1.5005124817127068E9
2.700647850304743 0.42522462039668074	3.238193332021539 -0.04404631496177469	2.700647850304743 1.5017137587563725E9	3.238193332021539 1.500007714843831E9	3.238193332021539 5.016055006584743E-4	5.643830723862434 1.5004867668259683E9
2.719701813270376 0.4207827378063227	3.2414549203334784 -0.04601271240599747	2.719701813270376 1.5015879271761854E9	3.2414549203334784 1.5000071962643976E9	3.2414549203334784 4.726284531526562E-4	5.659026212365502 1.5004623024672391E9
2.7387790898067648 0.41642522383962	3.2447163926260307 -0.04793289560587244	2.7387790898067648 1.5014772731442435E9	3.2447163926260307 1.5000067138496451E9	3.2447163926260307 4.443367261993672E-4	5.674356533110622 1.5004390886365192E9
2.7559911007571536 0.4124937873978842	3.247977931944223 -0.049806864561392494	2.7559911007571536 1.5013831325428517E9	3.247977931944223 1.500006267599573E9	3.247977931944223 4.167303197987185E-4	5.689701460065026 1.5004172322838085E9
2.7731841299479014 0.40850727044364366	3.2515118811051957 -0.051805187303272326	2.7731841299479014 1.5012947671096385E9	3.2515118811051957 1.5000058102346542E9	3.2515118811051957 3.872924115883017E-4	5.705022201062231 1.5003965359216833E9
2.790367172656152 0.40446567297689473	3.2554963853214582 -0.0540285972180099	2.790367172656152 1.501212176844604E9	3.2554963853214582 1.5000053378062885E9	3.2554963853214582 3.545336937221802E-4	5.720318862317026 1.5003769995501437E9
2.807549239843637 0.4003689949976339	3.259931504520562 -0.05647709430558567	2.807549239843637 1.501135361747748E9	3.259931504520562 1.5000048503144748E9	3.259931504520562 3.1845416620046504E-4	5.735591550546591 1.5003586231691897E9
2.822416552629628 0.396699010703899	3.264370001663233 -0.05890691663236591	2.822416552629628 1.501070794438616E9	3.264370001663233 1.5000044018001318E9	3.264370001663233 2.826403708444661E-4	5.7540409971457604 1.5003378926422875E9
2.8372834057395964 0.39293027380180856	3.2692377176738594 -0.06155501666649865	2.8372834057395964 1.501009020945526E9	3.2692377176738594 1.5000039629874177E9	3.2692377176738594 2.4359338327495288E-4	5.772195772091274 1.5003186176255906E9
2.852163598483993 0.38906278429136965	3.2745346841318272 -0.06442139440797323	2.852163598483993 1.5009500412684777E9	3.2745346841318272 1.5000035338763318E9	3.2745346841318272 2.0131320349192543E-4	5.790056142599452 1.5003007981190991E9
2.8670708931288122 0.3850965421725787	3.2800368462508755 -0.06738826153684574	2.8670708931288122 1.5008938554074712E9	3.2800368462508755 1.5000031422757668E9	3.2800368462508755 1.5752960910519947E-4	5.807622389321988 1.500284434122813E9
2.8814808283748805 0.3811651948719801	3.285983633818441 -0.07058897677052034	2.8814808283748805 1.5008420773434322E9	3.285983633818441 1.5000027932068133E9	3.285983633818441 1.102646860294812E-4	5.8316242224565205 1.5002638744940147E9
2.8958654371055577 0.37716464369538816	3.2923750679233192 -0.07402354010898993	2.8958654371055577 1.5007928798961291E9	3.2923750679233192 1.5000024866694703E9	3.2923750679233192 5.951843426532572E-5	5.854368147696321 1.5002455942016244E9
2.9102371510649214 0.3730948886428047	3.2991568816564474 -0.07766824681942897	2.9102371510649214 1.5007462630655618E9	3.2991568816564474 1.5000022402218618E9	3.2991568816564474 5.629305637965548E-6	5.875855747192921 1.5002295932456424E9
2.924608435460591 0.3689559297142333	3.3064218813342543 -0.08158182525314306	2.924608435460591 1.5007022268517303E9	3.3064218813342543 1.5000020864320822E9	3.3064218813342543 -5.228737643825448E-5	5.89608889781896 1.5002158716260688E9
2.9431363056835145 0.36350041655536014	3.3141700830733347 -0.0857642754101251	2.9431363056835145 1.5006492337617848E9	3.3141700830733347 1.5000020253001316E9	3.3141700830733347 -1.1423161196322334E-4	5.920163057524911 1.5002005768515625E9
2.96167140710921 0.3580096798543133	3.3225040600800964 -0.09028303369637225	2.96167140710921 1.5006002541243777E9	3.3225040600800964 1.5000020796975758E9	3.3225040600800964 -1.8122168662060374E-4	5.944232990798594 1.500186475411163E9
2.98025805859624 0.3524837196110946	3.331379450906076 -0.09514093945418	2.98025805859624 1.500555287939509E9	3.331379450906076 1.5000023099111786E9	3.331379450906076 -2.533299173709266E-4	5.968302022022346 1.5001735673048706E9
2.998940212136881 0.34692253582569865	3.340796268974513 -0.10033799268354127	2.998940212136881 1.5005143352071788E9	3.340796268974513 1.50000271594094E9	3.340796268974513 -3.30556304213859E-4	5.992373475952235 1.500161852532685E9
3.0206854180257303 0.34049415658130133	3.351010234890489 -0.10606966435495213	3.0206854180257303 1.5004716111649144E9	3.351010234890489 1.5000033586585119E9	3.351010234890489 -4.158505894613648E-4	6.015943663532961 1.5001512242438674E9
3.0423014402400046 0.3341235334551511	3.3618425670131766 -0.11260252509760083	3.0423014402400046 1.5004329065501418E9	3.3618425670131766 1.5000043879295104E9	3.3618425670131766 -5.133185100161261E-4	6.040355264328975 1.500141063970788E9
3.0638574726361116 0.32781066644724977	3.373293277168951 -0.11993657491148202	3.0638574726361116 1.5003982213628614E9	3.373293277168951 1.5000058037539349E9	3.373293277168951 -6.229600658776988E-4	6.065608670750327 1.500131371713447E9
3.085423286509703 0.32155555555759374	3.387161157022323 -0.12838366294589765	3.085423286509703 1.500367555603073E9	3.387161157022323 1.5000079807565594E9	3.387161157022323 -7.493812893176752E-4	6.0917042372313395 1.5001221474718444E9
3.1009073526834414 0.3171394487378363	3.4002930723953293 -0.13574409253192155	3.1009073526834414 1.5003472419398687E9	3.4002930723953293 1.5000101579591146E9	3.4002930723953293 -8.595453844143517E-4	6.114118636357356 1.500114777189977E9
3.116404457467829 0.3127352818931959	3.412692006924113 -0.1420178636695466	3.116404457467829 1.5003282166742275E9	3.412692006924113 1.5000123353616E9	3.412692006924113 -9.534523511680612E-4	6.1366572898908345 1.5001077913298879E9
3.1319252917997726 0.30834305502367254	3.427353252039647 -0.14931212041976405	3.1319252917997726 1.5003104798061492E9	3.427353252039647 1.5000151523394277E9	3.427353252039647 -0.0010627630552119136	6.159320284525327 1.5001011898915768E9
3.147480497689013 0.30396276812926804	3.4411294893740068 -0.15607803043502333	3.147480497689013 1.500294031335634E9	3.4411294893740068 1.500018031766687E9	3.4411294893740068 -0.0011642868105311574	6.182107705535237 1.500094972875044E9
3.160739300012473 0.3002348501929637	3.454020781857021 -0.162315593715312	3.160739300012473 1.5002806641352046E9	3.454020781857021 1.5000209736433764E9	3.454020781857021 -0.0012580236171246826	6.20223270295983 1.5000897669121456E9
3.173994291832266 0.29651052572794345	3.466702170713352 -0.16855166474255423	3.173994291832266 1.5002679505000408E9	3.466702170713352 1.5000241314419527E9	3.466702170713352 -0.001351911665421813	6.22213086813708 1.5000848419894392E9
3.187252135224023 0.2927897947342073	3.478773428186131 -0.17449227433747883	3.187252135224023 1.5002558904301429E9	3.478773428186131 1.500027354181202E9	3.478773428186131 -0.0014414816427266173	6.241802229417518 1.5000801981069252E9
3.200519487967709 0.2890726572117588	3.4902579550607222 -0.18013742250006803	3.200519487967709 1.500244483925511E9	3.4902579550607222 1.5000306418611238E9	3.4902579550607222 -0.00152673354903854	6.261246816143724 1.5000758352646034E9
3.2118061721841116 0.2859104014913454	3.500343220971421 -0.18513134342745996	3.2118061721841116 1.500235149284634E9	3.500343220971421 1.5000337060656507E9	3.500343220971421 -0.0016022669431667866	6.280372487272782 1.5000717225706422E9
3.2230819117365566 0.28274286766046597	3.5103477282394286 -0.18997568067123094	3.2230819117365566 1.5002261571317823E9	3.5103477282394286 1.5000368306201277E9	3.5103477282394286 -0.0016756032392962758	6.298962141065438 1.5000678637855558E9
3.2343507970977874 0.2795700557191223	3.520336429874279 -0.1946704342313792	3.2343507970977874 1.5002175074669552E9	3.520336429874279 1.5000400155245545E9	3.520336429874279 -0.0017467424374268967	6.317015791986703 1.5000642589093442E9
3.245616926206351 0.2763919656673144	3.529756258362904 -0.19890312120081166	3.245616926206351 1.500209200290153E9	3.529756258362904 1.5000430128942819E9	3.529756258362904 -0.0018109249733168084	6.334533455829384 1.5000609079420073E9
3.255549342508564 0.2735747024528097	3.539592991129782 -0.20304235390274084	3.255549342508564 1.500202074518308E9	3.539592991129782 1.5000460620525959E9	3.539592991129782 -0.0018736956789793266	6.353752650592878 1.5000573675540283E9
3.2654677122827636 0.2707365293446573	3.5499151557738235 -0.20708813233715784	3.2654677122827636 1.5001951287742915E9	3.5499151557738235 1.5000491629994972E9	3.5499151557738235 -0.0019350545544140072	6.371835635922772 1.500054133820026E9
3.27537481482484 0.26787744634286614	3.5616255035827 -0.2111788441586091	3.27537481482484 1.5001883630581036E9	3.5616255035827 1.500052433503633E9	3.5616255035827 -0.0019970546635056383	6.388782421826633 1.5000512067400005E9
3.285273438921393 0.26499745344743264	3.5733091368854324 -0.21487063822313335	3.285273438921393 1.5001817773697448E9	3.5733091368854324 1.5000554808976567E9	3.5733091368854324 -0.002052940338766019	6.404593020469555 1.5000485863139517E9
3.296708673142646 0.2616237009035407	3.5850123527834237 -0.21816351453071992	3.296708673142646 1.5001743171991897E9	3.5850123527834237 1.500058305181568E9	3.5850123527834237 -0.00210271158019515	6.421336670394416 1.5000458708295467E9
3.3081540469337485 0.2581837804649867	3.596499141690614 -0.22100888104075533	3.3081540469337485 1.5001669912023594E9	3.596499141690614 1.500060810253365E9	3.596499141690614 -0.0021456058903461814	6.438080306924482 1.500043228758775E9
3.319614253822038 0.25467769213178126	3.6088970628139667 -0.22369522936809627	3.319614253822038 1.5001597993792539E9	3.6088970628139667 1.5000632323487222E9	3.6088970628139667 -0.0021859262406573885	6.454823945331215 1.5000406601016362E9
3.331093969141155 0.25110543590392265	3.6222215987456163 -0.22622255951272852	3.331093969141155 1.5001527417298734E9	3.6222215987456163 1.5000655714676387E9	3.6222215987456163 -0.002223672631128105	6.471567600886074 1.5000381648581307E9
3.34236804369749 0.24752204434321268	3.6337991507469654 -0.22802736584354033	3.34236804369749 1.5001459210248132E9	3.6337991507469654 1.5000672680481167E9	3.6337991507469654 -0.0022503158790878617	6.488885643865756 1.5000356614920871E9
3.3536429872567215 0.24387596552169644	3.644588891513043 -0.2295327854201874	3.3536429872567215 1.5001392284382927E9	3.644588891513043 1.5000686948258991E9	3.644588891513043 -0.0022723265636908083	6.505846915341383 1.5000332980856948E9
3.3649232756899963 0.24016719943937925	3.6546083048302966 -0.23073881824265907	3.3649232756899963 1.5001326639703124E9	3.6546083048302966 1.500069851800986E9	3.6546083048302966 -0.002289704684936945	6.522452001852241 1.500031074638954E9
3.376213378511664 0.23639574609625935	3.6640889824583445 -0.23177533837401487	3.376213378511664 1.500126227620872E9	3.6640889824583445 1.500070845922114E9	3.6640889824583445 -0.0023044266420180213	6.538701528507981 1.5000289911518645E9
3.3877974273170186 0.23248182797098327	3.672927062119058 -0.2326692129299195	3.3877974273170186 1.5001198030264885E9	3.672927062119058 1.5000717048650038E9	3.672927062119058 -0.0023169488597437624	6.556263753306767 1.5000268298911092E9
3.399372723281017 0.22856263985832204	3.6811522481609913 -0.23342044191036582	3.399372723281017 1.5001135897686033E9	3.6811522481609913 1.500072428629655E9	3.6811522481609913 -0.002327271338113502	6.573477773227209 1.5000247942773893E9
3.4109440978950145 0.22463818175826855	3.6888301871009346 -0.2340760574598777	3.4109440978950145 1.5001075878472161E9	3.6888301871009346 1.5000730567858922E9	3.6888301871009346 -0.002336113605311497	6.590344176819363 1.5000228843107045E9
3.4225163875619216 0.22070845367082814	3.6960704621528064 -0.2346644214578424	3.4225163875619216 1.5001017972623272E9	3.6960704621528064 1.500073619589654E9	3.6960704621528064 -0.0023439271210652377	6.606863589787722 1.5000210999910548E9
3.435898667004395 0.2162101931059679	3.7029154709767553 -0.23518553390424746	3.435898667004395 1.5000954347203965E9	3.7029154709767553 1.5000741170409403E9	3.7029154709767553 -0.002350711885373947	6.62462402786957 1.5000192708288562E9
3.4492544573484936 0.2117987286798213	3.7093337457163646 -0.23565946877403565	3.4492544573484936 1.500089415803274E9	3.7093337457163646 1.5000745676231184E9	3.7093337457163646 -0.0023567951574371424	6.642078292649926 1.5000175561548858E9
3.462591156887523 0.2074740603923848	3.715539805096304 -0.23611205912674027	3.462591156887523 1.5000837405109591E9	3.715539805096304 1.5000749983323474E9	3.715539805096304 -0.002362560138849724	6.659226813161835 1.5000159559691436E9
3.47591619571347 0.2032361882436584	3.7215785927957596 -0.23654330496235065	3.47591619571347 1.5000784088434525E9	3.7215785927957596 1.5000754091686275E9	3.7215785927957596 -0.0023680068296112475	6.676070041802237 1.5000144702716296E9
3.489986368243103 0.19887067482178455	3.7280216350466584 -0.23700853100888164	3.489986368243103 1.500073122064618E9	3.7280216350466584 1.5000758542721941E9	3.7280216350466584 -0.0023739005755233364	6.694801286651808 1.500012912777495E9
3.5040702346850168 0.19460571695405715	3.734439362416426 -0.23748597329170007	3.5040702346850168 1.5000681387380712E9	3.734439362416426 1.5000763152753587E9	3.734439362416426 -0.002379997535180368	6.713298136883611 1.500011466866469E9
3.518180343050236 0.1904413146404691	3.7408762481769764 -0.23797563181081127	3.518180343050236 1.500063458863812E9	3.7408762481769764 1.5000767921781201E9	3.7408762481769764 -0.002386297708582564	6.731560739230736 1.5000101325385516E9
3.5323291715313245 0.1863774678810186	3.748413896833652 -0.23858191516492955	3.5323291715313245 1.5000590824418406E9	3.748413896833652 1.5000773899195876E9	3.748413896833652 -0.002394246334005757	6.749589246145867 1.500008909793743E9
3.5476964225805325 0.18208129880944046	3.7561300009981786 -0.2392482792684545	3.5476964225805325 1.5000546238185441E9	3.7561300009981786 1.5000780586622798E9	3.7561300009981786 -0.002403149643925518	6.771247515416383 1.5000075561493719E9
3.5630475597727957 0.17783794877699233	3.7640567975385353 -0.2399747241213861	3.5630475597727957 1.5000503945881872E9	3.7640567975385353 1.5000787984061964E9	3.7640567975385353 -0.002413007638341403	6.7928274584071815 1.5000063329046307E9
3.57839874464886 0.17364741778367243	3.7731433348766084 -0.24088609550282758	3.57839874464886 1.5000463947507699E9	3.7731433348766084 1.5000797408412092E9	3.7731433348766084 -0.0024256342247434013	6.814329133477371 1.5000052400595193E9
3.5937661385990283 0.16950970582948255	3.782564755190402 -0.24192079806752975	3.5937661385990283 1.5000426243062923E9	3.782564755190402 1.500080834829104E9	3.782564755190402 -0.0024402061042344556	6.835752599625686 1.500004277614038E9
3.6079604775174055 0.16568811105444947	3.792330232798961 -0.24307883181549084	3.6079604775174055 1.5000392708100853E9	3.792330232798961 1.5000820803698802E9	3.792330232798961 -0.002456723276814455	6.860601380274109 1.5000033001487138E9
3.6221158477260946 0.16180442315448484	3.803401697471229 -0.2445316742230057	3.6221158477260946 1.500036017409251E9	3.803401697471229 1.5000836703386297E9	3.803401697471229 -0.00247774063985562	6.885768904732006 1.5000024863613884E9
3.636244847838869 0.15785864212959044	3.8148957384172175 -0.24617718994401638	3.636244847838869 1.5000328641037893E9	3.8148957384172175 1.5000855206979144E9	3.8148957384172175 -0.0025017850293218577	6.911257136245161 1.5000018362520618E9
3.6503601470795837 0.15385076797977337	3.826812454557146 -0.2480153789785282	3.6503601470795837 1.5000298108937004E9	3.826812454557146 1.5000876314477332E9	3.826812454557146 -0.0025288564452132798	6.937067964877759 1.5000013498207343E9
3.6623727922582234 0.15026698299239793	3.8403016852640905 -0.2502917149468109	3.6623727922582234 1.5000272013970835E9	3.8403016852640905 1.5000903106201365E9	3.8403016852640905 -0.0025626523581958613	6.963366642589013 1.5000010387853396E9
3.6744111443271525 0.14654224504971491	3.854318466756538 -0.2528079271389094	3.6744111443271525 1.5000246388715866E9	3.854318466756538 1.5000933767483234E9	3.854318466756538 -0.002600199559387285	6.9901290045068265 1.5000009663526456E9
3.6865020131410815 0.14267655415172253	3.8688797704581037 -0.2555640155548202	3.6865020131410815 1.5000221233172095E9	3.8688797704581037 1.5000968298322937E9	3.8688797704581037 -0.0026414980487873283	7.017360390538228 1.5000011325226526E9
3.69867186148066 0.13866991029842435	3.886590016539183 -0.2590409944117864	3.69867186148066 1.500019654733952E9	3.886590016539183 1.5001013711266356E9	3.886590016539183 -0.0026937546707108692	7.045065869394832 1.5000015372953606E9
3.709997736640673 0.13479041312009432	3.903433368159361 -0.2624553863891377	3.709997736640673 1.500017418427549E9	3.903433368159361 1.500106023581982E9	3.903433368159361 -0.00274521774434744	7.071953731085435 1.500002190481432E9
3.7213022672763314 0.13078650357221822	3.9194202227995056 -0.26580719148686516	3.7213022672763314 1.500015281028118E9	3.9194202227995056 1.5001107871983325E9	3.9194202227995056 -0.002795887269696485	7.099175541858117 1.500003105828343E9
3.7326073630427095 0.12665818165479603	3.9383271595630918 -0.26989974181436605	3.7326073630427095 1.5000132425356593E9	3.9383271595630918 1.5001169053402827E9	3.9383271595630918 -0.002857932723377755	7.126734466934014 1.5000042833360941E9
3.743934930315671 0.12240544736782066	3.9560502904581893 -0.27383557208041953	3.743934930315671 1.5000113029501731E9	3.9560502904581893 1.5001231003235238E9	3.9560502904581893 -0.00291774822382418	7.154633556795128 1.5000057230046852E9
3.7563997553375215 0.11758165890164474	3.9726176537235043 -0.27761468228501496	3.7563997553375215 1.500009351806099E9	3.9726176537235043 1.5001293721480558E9	3.9726176537235043 -0.0029753337710349834	7.182082202914772 1.5000073933256395E9
3.768781758734203 0.11280244184080157	3.989469514493855 -0.28153234585122444	3.768781758734203 1.500007645657208E9	3.989469514493855 1.5001362437740548E9	3.989469514493855 -0.0030351537278763283	7.209759008161278 1.50000932193588E9
3.7811093600613797 0.10806779618529117	4.005184520702984 -0.2852298031686429	3.7811093600613797 1.5000061845035007E9	4.005184520702984 1.5001430666598628E9	4.005184520702984 -0.0030916975757999685	7.237666084753766 1.5000115088354068E9
3.7934113559126397 0.10337772193510641	4.019813783776399 -0.28870705423726317	3.7934113559126397 1.5000049683449767E9	4.019813783776399 1.500149840805479E9	4.019813783776399 -0.003144965314805571	7.26580549305706 1.5000139540242198E9
3.8064823405720714 0.09888884986311286	4.033603972777403 -0.2919868748040715	3.8064823405720714 1.5000040309549768E9	4.033603972777403 1.5001565604819832E9	4.033603972777403 -0.0031952596998631186	7.294510154646453 1.50001669214502E9
3.819578153319692 0.09449879258024385	4.046550379473794 -0.2950407516639375	3.819578153319692 1.5000033056108584E9	4.046550379473794 1.5001630955926359E9	4.046550379473794 -0.0032421121520820337	7.323354915590588 1.500019691759646E9
3.832733082691215 0.09020755008649939	4.058722171789036 -0.29786868481685413	3.832733082691215 1.5000027923126214E9	4.058722171789036 1.500169446137436E9	4.058722171789036 -0.003285522671461872	7.352341445265255 1.5000229528680973E9
3.845980958208225 0.0860151223818848	4.070151173840613 -0.30044517475987487	3.845980958208225 1.5000024910602653E9	4.070151173840613 1.5001754741382596E9	4.070151173840613 -0.003325063947822172	7.381471388672849 1.5000264754703743E9
3.8578046723099697 0.08229805728052941	4.081066274913071 -0.3028142932934026	3.8578046723099697 1.5000023716998594E9	4.081066274913071 1.500181209678831E9	4.081066274913071 -0.0033613966089413036	7.412066586241065 1.500030427007102E9
3.8695989736198753 0.0786128243563633	4.091541785013826 -0.3049760404174462	3.8695989736198753 1.5000023941305945E9	4.091541785013826 1.5001866527591498E9	4.091541785013826 -0.0033945206548197113	7.442706107287665 1.5000346723006039E9
3.8813885320826693 0.0749594236093829	4.102317330528719 -0.3070430465122902	3.8813885320826693 1.5000025583524709E9	4.102317330528719 1.5001920289642692E9	4.102317330528719 -0.0034261313013330694	7.47339146834124 1.5000392113508801E9
3.8931980473663774 0.07133785503959533	4.112823478182428 -0.3089065894211567	3.8931980473663774 1.500002864365488E9	4.112823478182428 1.500197002579317E9	4.112823478182428 -0.003454555450697839	7.50412417914435 1.5000440441579309E9
3.904154823976383 0.06799481116521822	4.123134920326628 -0.31056666914403497	3.904154823976383 1.5000032679939656E9	4.123134920326628 1.5002015736042926E9	4.123134920326628 -0.0034797931029136872	7.536761027464003 1.5000494792194192E9
3.9150478249843417 0.0647014358762723	4.135261840375597 -0.31225920718394473	3.9150478249843417 1.5000037746695342E9	4.135261840375597 1.5002063495141335E9	4.135261840375597 -0.0035053697745485177	7.569315598425962 1.5000553022670877E9
3.9258962655028817 0.06145772917274872	4.147301772976131 -0.313723167651653	3.9258962655028817 1.5000043843921936E9	4.147301772976131 1.5002105502074864E9	4.147301772976131 -0.0035273189716599216	7.601789398677482 1.5000615133009365E9
3.936719597977509 0.05826369105465279	4.159325032366567 -0.3149585505471455	3.936719597977509 1.5000050971619434E9	4.159325032366567 1.5002141756843503E9	4.159325032366567 -0.0035456406942472327	7.634183946135589 1.5000681123209653E9
3.9479113742132093 0.05503910173996207	4.172849172279891 -0.31607710876160855	3.9479113742132093 1.5000059176851258E9	4.172849172279891 1.5002174827744987E9	4.172849172279891 -0.003561920313541634	7.668702343065653 1.5000755977037296E9
3.959167045608 0.05181598051157099	4.186353084670661 -0.3169975380201171	3.959167045608 1.50000684405544E9	4.186353084670661 1.5002202030951712E9	4.186353084670661 -0.0035749836599386917	7.702962766193116 1.500083692381526E9
3.9705240050792687 0.048594327369477774	4.199865526142708 -0.31771983832265693	3.9705240050792687 1.5000078762728863E9	4.199865526142708 1.5002223366463678E9	4.199865526142708 -0.003584830733437517	7.736966843762254 1.5000923963543549E9
3.982018657095038 0.04537414231368597	4.212623442133579 -0.31824948765483096	3.982018657095038 1.5000090143374646E9	4.212623442133579 1.5002238546606169E9	4.212623442133579 -0.003591593150297668	7.770716241119638 1.5001017096222157E9
3.993353424888332 0.042216399373503855	4.225235811996199 -0.3186772719519029	3.993353424888332 1.500010229433573E9	4.225235811996199 1.5002250353533704E9	4.225235811996199 -0.0035966053999991763	7.80701565808611 1.500112545514074E9
4.004677319687726 0.03905283383298919	4.237703118292632 -0.31900319121385845	4.004677319687726 1.5000115470954258E9	4.237703118292632 1.500225878724628E9	4.237703118292632 -0.0035998674825415975	7.842800097153035 1.5001244572620752E9
4.016027671733157 0.035883445692143745	4.248329435064034 -0.319224136944098	4.016027671733157 1.5000129673230233E9	4.248329435064034 1.5002263843159788E9	4.248329435064034 -0.003601554159829324	7.878071568451703 1.500137444866219E9
4.027441551674281 0.03270823495097108	4.258725956580851 -0.3194051350972069	4.027441551674281 1.5000144901163654E9	4.258725956580851 1.5002267403578618E9	4.258725956580851 -0.0036024549375072165	7.912832171104999 1.5001515083265057E9
4.038098585901957 0.02973011596035402	4.2689001425975786 -0.3195461856731763	4.038098585901957 1.5000160055175757E9	4.2689001425975786 1.5002269468502765E9	4.2689001425975786 -0.0036025698155746086	7.951234299412426 1.5001686881324115E9
4.04868593256749 0.026727934744019244	4.277675085335978 -0.31964682609473183	4.04868593256749 1.500017623468103E9	4.277675085335978 1.500227023717361E9	4.277675085335978 -0.0036020972667041304	7.988687491403055 1.500187879719119E9
4.059233536189307 0.023701691301957872	4.286238793735773 -0.31973149386565947	4.059233536189307 1.5000193439679468E9	4.286238793735773 1.5002270271017714E9	4.286238793735773 -0.00360120854954027	8.025194907535065 1.5002090830866282E9
4.069771680085188 0.020651385634178787	4.294617422013995 -0.31980018898594853	4.069771680085188 1.5000211670171077E9	4.294617422013995 1.5002269570035071E9	4.294617422013995 -0.003599903664082472	8.060759960404232 1.500232298234939E9
4.078663064514892 0.018029925283680193	4.301768106382171 -0.319850892581683	4.078663064514892 1.500022800102841E9	4.301768106382171 1.500226839948685E9	4.301768106382171 -0.0035984218007856237	8.097262434509261 1.5002586758659468E9
4.087471397994022 0.015314359312633918	4.308820919950549 -0.31989551011726736	4.087471397994022 1.5000245695201054E9	4.308820919950549 1.5002266818953207E9	4.308820919950549 -0.003596675991573429	8.133735001419183 1.5002895161508055E9
4.096213715754134 0.012504687721034635	4.315817265863225 -0.3199340415926999	4.096213715754134 1.5000264752689013E9	4.315817265863225 1.5002264828434138E9	4.315817265863225 -0.003594666236445555	8.170180087936817 1.5003248190895147E9
4.104907441106045 0.009600910508889449	4.322037128715714 -0.3199649842786405	4.104907441106045 1.5000285173492284E9	4.322037128715714 1.5002262697162879E9	4.322037128715714 -0.0035926236920055263	8.20660012635835 1.500364584682075E9
4.1118222211349655 0.0069680361178052755	4.328305586806988 -0.3199937348957542	4.1118222211349655 1.5000304390017626E9	4.328305586806988 1.5002260270402207E9	4.328305586806988 -0.0035903632907512426	8.240743586425284 1.50040674141079E9
4.118802331982021 0.004222775849719972	4.334668724162566 -0.32002029344403216	4.118802331982021 1.5000325205504231E9	4.334668724162566 1.5002257548152127E9	4.334668724162566 -0.0035878850326822595	8.27486327655714 1.5004561285114095E9
4.125870927085895 0.0013651297046406432	4.340947641575929 -0.3200447328944227	4.125870927085895 1.5000347619952102E9	4.340947641575929 1.5002254612952657E9	4.340947641575929 -0.003585253156178193	8.308961185059372 1.5005127459839334E9
4.133050303853021 -0.001604902317436264	4.347440660895393 -0.3200682516679647	4.133050303853021 1.5000371633361235E9	4.347440660895393 1.5002251342598574E9	4.347440660895393 -0.003582352656544386	8.343039304050018 1.5005765938283615E9
4.139611559168524 -0.004327961068219644	4.354194168991962 -0.3200908497646635	4.139611559168524 1.5000394485658922E9	4.354194168991962 1.5002247737089872E9	4.354194168991962 -0.0035791835337811726	8.374977073208706 1.5006444460020194E9
4.146191762086313 -0.007040923557666724	4.361335110962173 -0.3201127488948652	4.146191762086313 1.5000417930812228E9	4.361335110962173 1.5002243601851573E9	4.361335110962173 -0.003575583173943132	8.406895941076995 1.5007238211495001E9
4.152809909762291 -0.009743789785773949	4.368885996696486 -0.3201306872726777	4.152809909762291 1.5000441968821154E9	4.368885996696486 1.50022383099945E9	4.368885996696486 -0.00357106194873913	8.438797536139223 1.500814719270804E9
4.159484675374697 -0.012436559752550203	4.376887678753179 -0.32014466489809035	4.159484675374697 1.5000466599685702E9	4.376887678753179 1.5002231861518645E9	4.376887678753179 -0.0035656198581687235	8.470683489526209 1.5009171403659308E9
4.166104374362871 -0.015058485179893388	4.3855239446767325 -0.32016023373117	4.166104374362871 1.5000491297085648E9	4.3855239446767325 1.5002225029535315E9	4.3855239446767325 -0.003559817237676733	8.500558674309836 1.5010258798714511E9
4.172705224121973 -0.01763287575678074	4.39388428872929 -0.32018299045760745	4.172705224121973 1.5000516156945307E9	4.39388428872929 1.500221955007474E9	4.39388428872929 -0.003555048526479144	8.530418825063277 1.5011526150081496E9
4.179306073881075 -0.020159731483215815	4.402024277250151 -0.32021293507739745	4.179306073881075 1.500054117926468E9	4.402024277250151 1.5002215423136916E9	4.402024277250151 -0.003551313724575845	8.560265275288916 1.5012973457760265E9
4.185925772869249 -0.022639052359195055	4.4113504894180275 -0.32025401850729107	4.185925772869249 1.5000566364043763E9	4.4113504894180275 1.5002211410378335E9	4.4113504894180275 -0.003547554633734796	8.590099360326265 1.5014600721750817E9
4.192600538481668 -0.02508399169547193	4.420580188227017 -0.3203042562840954	4.192600538481668 1.5000591812814152E9	4.420580188227017 1.5002208120289836E9	4.420580188227017 -0.0035442990604877	8.618045665873595 1.5016323388278499E9
4.199218686157659 -0.027470856324725013	4.429774420769374 -0.3203636484078105	4.199218686157659 1.500061719828099E9	4.429774420769374 1.500220555287142E9	4.429774420769374 -0.0035415470048344453	8.645980013099738 1.5018321337134025E9
4.205798889075461 -0.029799646246954303	4.440839322691067 -0.3204502845190307	4.205798889075461 1.5000642520444276E9	4.440839322691067 1.500220353452864E9	4.440839322691067 -0.0035389842493961385	8.673903493840571 1.5020594568317394E9
4.212360144390978 -0.03207036146216158	4.45199373304843 -0.32056262927004386	4.212360144390978 1.5000667779304016E9	4.45199373304843 1.500220275600539E9	4.45199373304843 -0.003537195594658927	8.70181720120709 1.5023143081828604E9
4.2195395211580875 -0.03449939923038148	4.463278537425675 -0.3207006826608394	4.2195395211580875 1.5000695411212363E9	4.463278537425675 1.5002203217301662E9	4.463278537425675 -0.0035361810406221448	8.728136481887484 1.5025845853807087E9
4.2266081162619455 -0.036851447927076286	4.476689429585778 -0.3209134524468267	4.2266081162619455 1.500072271575961E9	4.476689429585778 1.5002205901503458E9	4.476689429585778 -0.0035363017389040694	8.754446121011204 1.502896860308461E9
4.233588227108986 -0.03912650755225133	4.490232802036124 -0.3212047762510659	4.233588227108986 1.5000749692945757E9	4.490232802036124 1.5002211531994214E9	4.490232802036124 -0.003538047545423196	8.780747030767534 1.5032511329661174E9
4.2405030071378915 -0.04132457810590484	4.503913720353418 -0.32157465407355357	4.2405030071378915 1.50007763427708E9	4.503913720353418 1.500222010877393E9	4.503913720353418 -0.003541418460179747	8.807040124254302 1.503647403353678E9
4.2486983548592425 -0.043846645491393055	4.517978485967337 -0.32208467941970564	4.2486983548592425 1.5000807571570723E9	4.517978485967337 1.5002233475151863E9	4.517978485967337 -0.0035473451327840974	8.833293992417854 1.5040905360430398E9
4.256912282342622 -0.046318090585157456	4.532038646254758 -0.32276302151967773	4.256912282342622 1.5000838849630039E9	4.532038646254758 1.500225278134239E9	4.532038646254758 -0.003556197144780949	8.859539123936747 1.504605149396371E9
4.265168023120544 -0.04873891338719094	4.546109344497043 -0.32360968037346627	4.265168023120544 1.5000870176948743E9	4.546109344497043 1.5002278027345505E9	4.546109344497043 -0.0035679744961699686	8.885776424256372 1.505191243413671E9
4.273488460461449 -0.05110911389749706	4.558186381498395 -0.3245465001693839	4.273488460461449 1.500090155352684E9	4.558186381498395 1.500230701116721E9	4.558186381498395 -0.0035815858259951048	8.912006799633101 1.5058488180949402E9
4.28159093399144 -0.05335356446246298	4.570279298319571 -0.3256930450090616	4.28159093399144 1.500093192218634E9	4.570279298319571 1.5002343871490426E9	4.570279298319571 -0.0035986037775332944	8.938537950496096 1.5065946857417748E9
4.2896677159329935 -0.05551904768729887	4.582448686832406 -0.327049314892494	4.2896677159329935 1.5000961767974863E9	4.582448686832406 1.500238860831515E9	4.582448686832406 -0.0036190283507843155	8.965061026023616 1.507466928437688E9
4.297740527665016 -0.05760556357200475	4.592695281965078 -0.3284071917051099	4.297740527665016 1.5000991090892415E9	4.592695281965078 1.5002434628815196E9	4.592695281965078 -0.0036396883555442914	8.991576960709484 1.5084655461826804E9
4.305831122543765 -0.05961311211657705	4.603140848028187 -0.32996376446170483	4.305831122543765 1.500101989093899E9	4.603140848028187 1.500248930000661E9	4.603140848028187 -0.003663485394892586	9.018086689802692 1.5095905389767513E9
4.312658460220164 -0.06121850812069152	4.613857156527958 -0.331719033162277	4.312658460220164 1.5001043314874816E9	4.613857156527958 1.5002552621889389E9	4.613857156527958 -0.003690419468829421	9.044898064167585 1.5108701884291067E9
4.3194420789554515 -0.06271670837858156	4.624173443754195 -0.33358411859198167	4.3194420789554515 1.5001065434474103E9	4.624173443754195 1.5002621860147424E9	4.624173443754195 -0.0037191152637487965	9.071702047162216 1.512377560468327E9
4.326194680978274 -0.06410771289024542	4.634940684176502 -0.3356647710549163	4.326194680978274 1.500108624973685E9	4.634940684176502 1.5002702634638722E9	4.634940684176502 -0.00375115771501311	9.098499603333629 1.514112655094412E9
4.332929144026372 -0.06539152165569195	4.646231091148888 -0.33796099055107387	4.332929144026372 1.5001105760663054E9	4.646231091148888 1.5002794945363283E9	4.646231091148888 -0.0037865468226219176	9.125291697922988 1.5160754723073618E9
4.339105885294051 -0.06638653372619974	4.658252363981177 -0.3405241500455807	4.339105885294051 1.5001120987720177E9	4.658252363981177 1.5002901795380955E9	4.658252363981177 -0.003826057393711891	9.152386216178343 1.5183148818717256E9
4.345306818547196 -0.0673319995652113	4.6710730638683415 -0.34334365687649804	4.345306818547196 1.5001135568110297E9	4.6710730638683415 1.5003026577384717E9	4.6710730638683415 -0.003869488764583152	9.1794740522828 1.5209727671098847E9
4.351556275462316 -0.06822791917272486	4.68476038739834 -0.34641951104382596	4.351556275462316 1.5001149501833413E9	4.68476038739834 1.500316929137457E9	4.68476038739834 -0.003916840935235922	9.206556201902748 1.5240491280218391E9
4.357878027455221 -0.06907429254874398	4.699211042125332 -0.3497101928952917	4.357878027455221 1.5001162788889525E9	4.699211042125332 1.5003329810061707E9	4.699211042125332 -0.003967442360854113	9.233633661331872 1.5275439646075888E9
4.364115555687284 -0.06988793001371096	4.714771185525204 -0.3532737067527778	4.364115555687284 1.5001175627189713E9	4.714771185525204 1.5003517250662825E9	4.714771185525204 -0.004022139263722969	9.261014254454464 1.5315437374516692E9
4.370329167439753 -0.07069077317626782	4.731488955142961 -0.3571100526162754	4.370329167439753 1.5001188389426236E9	4.731488955142961 1.5003731613177924E9	4.731488955142961 -0.004080931643841935	9.288388902982323 1.5363266253752985E9
4.376542779192222 -0.07148282203641454	4.749082871020217 -0.36111479742490804	4.376542779192222 1.5001201075599096E9	4.749082871020217 1.5003970635126004E9	4.749082871020217 -0.004142164885417966	9.315758634834733 1.5418926283784769E9
4.382780307424285 -0.07226407659414757	4.768028897003924 -0.36534567271411245	4.382780307424285 1.5001213685708292E9	4.768028897003924 1.5004246736326113E9	4.768028897003924 -0.0042066229472117475	9.343124478485016 1.5482417464612043E9
4.389102059417191 -0.07305844854087429	4.788358219708631 -0.36980267848388326	4.389102059417191 1.5001226582719486E9	4.788358219708631 1.5004559916778247E9	4.788358219708631 -0.004274305829223058	9.370794124414273 1.55553070543369E9
4.395351516332312 -0.07386640345180862	4.808527156519443 -0.37403128031967636	4.395351516332312 1.5001239818299196E9	4.808527156519443 1.500487924604391E9	4.808527156519443 -0.004338151926174706	9.398458595260506 1.5643085464064891E9
4.401552449585457 -0.074687941326947	4.83027363167217 -0.3786307818892487	4.401552449585457 1.5001253392447422E9	4.83027363167217 1.5005263958481824E9	4.83027363167217 -0.004407476622714014	9.426118952403382 1.5745752693796015E9
4.407729190853137 -0.07552306216628768	4.853601341009571 -0.3836011831925896	4.407729190853137 1.5001267305164165E9	4.853601341009571 1.500571405409199E9	4.853601341009571 -0.004482279918840427	9.453776257696173 1.5863308743530273E9
4.414623717149388 -0.07653898475305976	4.873947724955013 -0.3880753743722982	4.414623717149388 1.5001284377936301E9	4.873947724955013 1.500616081805435E9	4.873947724955013 -0.004549660205249496	9.48173802279524 1.599867028888052E9
4.4215195579535225 -0.07759574871726738	4.894574805864851 -0.3927138490717743	4.4215195579535225 1.5001302363549657E9	4.894574805864851 1.500667291187611E9	4.894574805864851 -0.004619523784958891	9.509695418487127 1.6162707017483497E9
4.428417486171473 -0.07869335405890698	4.915484620690612 -0.3975166072910108	4.428417486171473 1.5001321262004235E9	4.915484620690612 1.5007250335557265E9	4.915484620690612 -0.004691870657967613	9.53764954090024 1.6355418929339201E9
4.435318274007786 -0.07983180077798391	4.932768339647076 -0.40160637757641116	4.435318274007786 1.500134107330003E9	4.932768339647076 1.5007793060492227E9	4.932768339647076 -0.004753534010802808	9.56560148654807 1.6576806024447637E9
4.443707887969408 -0.08125427026064624	4.949779316592596 -0.40571012021554775	4.443707887969408 1.5001366122817786E9	4.949779316592596 1.5008387771679585E9	4.949779316592596 -0.004815421046608704	9.593848168350092 1.683236092728199E9
4.452096665307997 -0.08271512401399672	4.9665263922263385 -0.40982783520840815	4.452096665307997 1.5001392289951236E9	4.9665263922263385 1.500903446911934E9	4.9665263922263385 -0.00487753176538508	9.622091330272896 1.7143620551305141E9
4.460485996539621 -0.08421436203803534	4.981047059204243 -0.4134852820237773	4.460485996539621 1.5001419574700384E9	4.981047059204243 1.5009662505226305E9	4.981047059204243 -0.0049327349068871715	9.650332103319986 1.7510584896517096E9
4.468877271904992 -0.0857519843327621	4.995071714056541 -0.41705503697424096	4.468877271904992 1.500144797706523E9	4.995071714056541 1.5010323790487807E9	4.995071714056541 -0.0049865988062257624	9.67857161878189 1.793325396291785E9
4.479123014171256 -0.0876736417947237	5.008620176278864 -0.4205371000597955	4.479123014171256 1.5001484066769185E9	5.008620176278864 1.5011018324903839E9	5.008620176278864 -0.005039123463400742	9.707040664247952 1.842124019268609E9
4.489362455962877 -0.08965014518723269	5.020989486175694 -0.4237478462920281	4.489362455962877 1.5001522074548142E9	5.020989486175694 1.5011711775804837E9	5.020989486175694 -0.005087541848658229	9.73550709790502 1.9017504990173728E9
4.499598122956287 -0.09168149451028551	5.0327446404648075 -0.4267342108029206	4.499598122956287 1.5001562000402102E9	5.0327446404648075 1.5012396374203942E9	5.0327446404648075 -0.005132454134835208	9.763972078973786 1.9722048355380762E9
4.509832543622582 -0.09376768976388394	5.043932678657242 -0.4294961935924766	4.509832543622582 1.5001603844331064E9	5.043932678657242 1.5013072120101159E9	5.043932678657242 -0.005173860321931901	9.792436766852418 2.0534870288307188E9
4.519314018163653 -0.09578789564000179	5.056809872925592 -0.43239936723323513	4.519314018163653 1.5001645325293941E9	5.056809872925592 1.5013826523158944E9	5.056809872925592 -0.00521696804118077	9.821118345449696 2.1474391259466596E9
4.528796650200714 -0.09784045336863745	5.068756160287284 -0.43498673947080757	4.528796650200714 1.5001688515728245E9	5.068756160287284 1.5014532900315084E9	5.068756160287284 -0.005255171145605032	9.849798262108846 2.2624432035663543E9
4.5382813348147595 -0.09992536294979093	5.079773005464215 -0.43725831030518325	4.5382813348147595 1.5001733415633974E9	5.079773005464215 1.5015191251569567E9	5.079773005464215 -0.00528846963520413	9.878477703789441 2.3984992616898026E9
4.547768966505854 -0.10204262438346046	5.09421123794049 -0.44012180494474595	4.547768966505854 1.5001780025011132E9	5.09421123794049 1.501605980840492E9	5.09421123794049 -0.005330154321971704	9.907157857510027 2.5556073003170047E9
4.557898915808869 -0.10431104271455727	5.108644620724972 -0.44289064808788847	4.557898915808869 1.5001831316887033E9	5.108644620724972 1.501695178673283E9	5.108644620724972 -0.005370172138665198	9.936053450232892 2.7373261301950836E9
4.568028004740953 -0.10657002460478981	5.123085897749705 -0.4455648397346037	4.568028004740953 1.5001883779498298E9	5.123085897749705 1.501786718655329E9	5.123085897749705 -0.005408523085284279	9.964948374954497 2.959951749007462E9
4.578157323587427 -0.10881957005416165	5.139401478061694 -0.4484458750878568	4.578157323587427 1.5001937412844927E9	5.139401478061694 1.5018898646034262E9	5.139401478061694 -0.005449378153135288	9.993843847286604 3.2234841567541394E9
4.588287962559381 -0.11105967906266923	5.1556702787786906 -0.4513486908286568	4.588287962559381 1.5001992216926923E9	5.1556702787786906 1.5020017478589327E9	5.1556702787786906 -0.0054904665645608705	10.022741082771866 3.5279233534351153E9
4.599912952990986 -0.11359638761253432	5.17199506426337 -0.4542732869569859	4.599912952990986 1.5002056222549784E9	5.17199506426337 1.5021223684218485E9	5.17199506426337 -0.005531788319560916	10.051852204197013 3.880049275489621E9
4.611533519747997 -0.11608126924956341	5.19057592419987 -0.45797752264799474	4.611533519747997 1.5002120808749154E9	5.19057592419987 1.5022857193734496E9	5.19057592419987 -0.0055849399383624	10.080963701845068 4.31175024297174E9
4.623151307901172 -0.1185143239737565	5.209158306724086 -0.46194730960480523	4.623151307901172 1.5002185975525036E9	5.209158306724086 1.5024821161655228E9	5.209158306724086 -0.005642303653843329	10.110076820924256 4.823026255881473E9
4.634767963701731 -0.1208955517851118	5.227744327142578 -0.46618264782741914	4.634767963701731 1.5002251722877426E9	5.227744327142578 1.502711558798068E9	5.227744327142578 -0.005703879466003038	10.139192806434767 5.413877314218819E9
4.649345127854477 -0.1237717452531486	5.248957868802999 -0.47128258050859895	4.649345127854477 1.5002333996026452E9	5.248957868802999 1.503019125763554E9	5.248957868802999 -0.005778284410825508	10.168521058943762 6.097356299643833E9
4.663922723814082 -0.1265548764577078	5.270158953197477 -0.47657834082329575	4.663922723814082 1.5002416387638223E9	5.270158953197477 1.5033869349690998E9	5.270158953197477 -0.00585561841454263	10.197850788902347 6.936144394696956E9
4.678500931056975 -0.12924494539878584	5.291369131809773 -0.48206992877150245	4.678500931056975 1.500249889771274E9	5.291369131809773 1.5038149864147046E9	5.291369131809773 -0.00593588147715396	10.22718327209018 7.930241599378186E9
4.693079929037009 -0.13184195207638805	5.313280563089609 -0.48796719787222553	4.693079929037009 1.5002581526250007E9	5.313280563089609 1.5043523425932696E9	5.313280563089609 -0.006022141343451693	10.256519783927724 9.079647913687525E9
4.709283342818817 -0.1346270060899437	5.334059607818348 -0.49353154653320797	4.709283342818817 1.5002673457928758E9	5.334059607818348 1.5049322775190105E9	5.334059607818348 -0.00610318212204053	10.286066859742519 1.0410536738994745E10
4.72548679715214 -0.13731731504289524	5.353820732976762 -0.4987629747544391	4.72548679715214 1.5002765438503907E9	5.353820732976762 1.505554791191927E9	5.353820732976762 -0.006179003812920359	10.315616578439569 1.2044633350151709E10
4.741690538494584 -0.13991287893524795	5.372761003983866 -0.5034812012006222	4.741690538494584 1.5002857467975454E9	5.372761003983866 1.5061909758480277E9	5.372761003983866 -0.006246592945593933	10.345170247367554 1.3981937747158411E10
4.757894813290658 -0.14241369776700008	5.391161456650333 -0.5078438586155398	4.757894813290658 1.5002949546343398E9	5.391161456650333 1.5068406465440378E9	5.391161456650333 -0.00630835396111329	10.374729173351017 1.6222449930014856E10
4.77429573061184 -0.14485944989137867	5.409035057467072 -0.5118509469991777	4.77429573061184 1.5003042722375908E9	5.409035057467072 1.5075038032799566E9	5.409035057467072 -0.006364286859477653	10.404496602127004 1.8820585534801907E10
4.790696178399535 -0.14723488536645046	5.424636693862341 -0.5150659893847918	4.790696178399535 1.5003136268191411E9	5.424636693862341 1.5080760677264788E9	5.424636693862341 -0.006408150522133616	10.434267911028877 2.200624574187313E10
4.80709641218651 -0.1495400041922208	5.440022077699962 -0.5180980467380438	4.80709641218651 1.5003230183789907E9	5.440022077699962 1.5086519377602725E9	5.440022077699962 -0.006448807384518141	10.464044439950499 2.5779430551228523E10
4.823496687515535 -0.15177480636868435	5.455207801098024 -0.5209471190589214	4.823496687515535 1.5003324469171398E9	5.455207801098024 1.5092314133813374E9	5.455207801098024 -0.006486257446630451	10.493827528081209 3.014013996286809E10
4.840545419525199 -0.15403857336537552	5.468473260581058 -0.5233060836578245	4.840545419525199 1.5003423024076169E9	5.468473260581058 1.5097314738028152E9	5.468473260581058 -0.006516511578744667	10.523816780870327 3.520338522266905E10
4.857593070227478 -0.15626596287101524	5.481854696232831 -0.525704368106731	4.857593070227478 1.500352331257776E9	5.481854696232831 1.5102713278261507E9	5.481854696232831 -0.006547125961808843	10.553811230804707 4.138694412276446E10
4.8746399265880305 -0.15845697488560706	5.495423724558816 -0.5281419724056375	4.8746399265880305 1.5003625334676175E9	5.495423724558816 1.5108509754513438E9	5.495423724558816 -0.0065781005958224234	10.583812251278323 4.869081666315432E10
4.891686275612633 -0.16061160940914387	5.510724093521205 -0.5310926252117119	4.891686275612633 1.5003729090371408E9	5.510724093521205 1.5116134447151878E9	5.510724093521205 -0.006616298277073552	10.613821214783021 5.711500284383863E10
4.916359195876458 -0.16374918917290326	5.5245174867195725 -0.533855548904941	4.916359195876458 1.5003886353611383E9	5.5245174867195725 1.5123830815873384E9	5.5245174867195725 -0.00665237395819629	10.643892884209023 6.6858468255546844E10
4.940992020126759 -0.16684020396519283	5.536811429038918 -0.5364307434853268	4.940992020126759 1.500404907333917E9	5.536811429038918 1.5131598860677946E9	5.536811429038918 -0.006686327639190527	10.673971097770487 7.866774772970331E10
4.965624844377062 -0.16988465378601436	5.551721994525959 -0.5397865164741615	4.965624844377062 1.5004217249554758E9	5.551721994525959 1.5142592659015267E9	5.551721994525959 -0.0067313141622483705	10.704057243669164 9.254284126630801E10
4.990297764640886 -0.17288253863536962	5.565280710748349 -0.5430249069417199	4.990297764640886 1.5004390882258158E9	5.565280710748349 1.5154313661428015E9	5.565280710748349 -0.00677525308274718	10.734152709009129 1.0848374886536096E11
5.016540564501215 -0.17600704119597044	5.577488243385088 -0.5461459148880037	5.016540564501215 1.5004581086487422E9	5.577488243385088 1.516676186791619E9	5.577488243385088 -0.006818144400686955	10.763564801874567 1.2644056500386017E11
5.042733213006217 -0.17906229949592056	5.589106385527706 -0.5493973246475514	5.042733213006217 1.500477646699657E9	5.589106385527706 1.5180865921149213E9	5.589106385527706 -0.006863477601512292	10.792984478175415 1.479017014874416E11
5.06892586151122 -0.18204831353522	5.601109718911509 -0.5528646247676745	5.06892586151122 1.50049770237856E9	5.601109718911509 1.5197667054242766E9	5.601109718911509 -0.006911943466433424	10.822413039927122 1.7286715831610522E11
5.09516866137155 -0.18496508331387052	5.613574112386777 -0.5565478152483676	5.09516866137155 1.500518275685451E9	5.613574112386777 1.5217165267196846E9	5.613574112386777 -0.006963541995450463	10.851851787966181 2.0133693548985107E11
5.1198910034757175 -0.1875729678155329	5.626389603126088 -0.5603104507686938	5.1198910034757175 1.5005374867913225E9	5.626389603126088 1.5239418261456962E9	5.626389603126088 -0.007016041924331474	10.880512840185899 2.3309464280979987E11
5.144614008785942 -0.19014314328626103	5.639179594867363 -0.5639856182385943	5.144614008785942 1.5005572658986144E9	5.639179594867363 1.5263462238346083E9	5.639179594867363 -0.007067039307968371	10.909182365914607 2.704948744818266E11
5.1693383689687 -0.1926756097260549	5.651985906655117 -0.5675733176580513	5.1693383689687 1.5005776130073268E9	5.651985906655117 1.5289297197864206E9	5.651985906655117 -0.007116534146360821	10.937861572747655 3.135376305059312E11
5.194064775576766 -0.19517036713491276	5.667512132686317 -0.5717049436995447	5.194064775576766 1.50059852811746E9	5.667512132686317 1.532242414628119E9	5.667512132686317 -0.007172899591627258	10.966551667057935 3.622229108821137E11
5.218480791232096 -0.19762526411808512	5.683031756391497 -0.5757007609195304	5.218480791232096 1.5006199191610892E9	5.683031756391497 1.535812010650903E9	5.683031756391497 -0.0072269680274207335	10.994481090062223 4.1611807074246265E11
5.242896121512979 -0.20009199351016438	5.698555344528101 -0.5795607693180083	5.242896121512979 1.5006424221932275E9	5.698555344528101 1.5396385078547726E9	5.698555344528101 -0.007278739453741024	11.022419776703883 4.786516970231396E11
5.267311432471239 -0.2025705553111452	5.718146699448228 -0.5842907467148821	5.267311432471239 1.500666037213875E9	5.718146699448228 1.54496801518762E9	5.718146699448228 -0.007341688970124883	11.050368846847473 5.498237897241445E11
5.291727390160277 -0.2050609495210276	5.7364654662374726 -0.5886651150747424	5.291727390160277 1.500690764223032E9	5.7364654662374726 1.5505279038501205E9	5.7364654662374726 -0.007399744561055966	11.078329419109922 6.296343488454777E11
5.315745391158721 -0.20753809495735265	5.753519900057313 -0.5926838743975873	5.315745391158721 1.5007163868410287E9	5.753519900057313 1.556318173842273E9	5.753519900057313 -0.0074529062265338295	11.105545928515062 7.172231941567433E11
5.339761461299489 -0.2100596406513544	5.772968210052468 -0.597222262921437	5.339761461299489 1.5007437906904051E9	5.772968210052468 1.5637546997889402E9	5.772968210052468 -0.007512840003311095	11.132772398833708 8.173191032338419E11
5.363776234388541 -0.21262558660302755	5.790810075954952 -0.6013526616131495	5.363776234388541 1.500772975771161E9	5.790810075954952 1.5713820222530463E9	5.790810075954952 -0.007567338575021122	11.160009868360019 9.299220760767734E11
5.387790344334538 -0.21523593281237563	5.807069149056199 -0.6050750704727177	5.387790344334538 1.5008039420832968E9	5.807069149056199 1.579200141234591E9	5.807069149056199 -0.007616401941663243	11.187259374130832 1.0550321126855381E12
5.405691924481911 -0.21722351535311635	5.821748323552335 -0.6084246736362191	5.405691924481911 1.5008285467165494E9	5.821748323552335 1.5869524539848852E9	5.821748323552335 -0.007660566066460373	11.213781216480278 1.1909886087940774E12
5.423593816728617 -0.21925255835221247	5.8364081975582875 -0.61171821644679	5.423593816728617 1.500854704871589E9	5.8364081975582875 1.5954143149109635E9	5.8364081975582875 -0.007703907308213243	11.240313630478198 1.3439789229410454E12
5.441496439604646 -0.22132306180967287	5.851094382542043 -0.6149556989044163	5.441496439604646 1.5008824165484152E9	5.851094382542043 1.6045857240128257E9	5.851094382542043 -0.007746425666921409	11.266857578555875 1.5140030551264421E12
5.459400211588751 -0.22343502572549578	5.863237571988391 -0.6175972831997365	5.459400211588751 1.5009116817470284E9	5.863237571988391 1.6128086846659338E9	5.863237571988391 -0.007781080891730797	11.293414021890575 1.7010610053502673E12
5.476094284484439 -0.2254480510102157	5.875347457163453 -0.6201336903159147	5.476094284484439 1.5009406430078182E9	5.875347457163453 1.621294141223827E9	5.875347457163453 -0.007814151346351883	11.319258961519054 1.9021025222525703E12
5.492787950082131 -0.227510588029177	5.887497910057073 -0.6225649202529544	5.492787950082131 1.5009716175882545E9	5.887497910057073 1.630042093686504E9	5.887497910057073 -0.007845637030784225	11.345115002610035 2.1249067184430034E12
5.509481547714044 -0.2296226367823868	5.899752935503752 -0.6248416152694487	5.509481547714044 1.5010046054883375E9	5.899752935503752 1.6388567514944146E9	5.899752935503752 -0.007874721323821832	11.370983037025992 2.369473593921566E12
5.52617541671654 -0.23178419726984156	5.911409097433886 -0.6268384472583497	5.52617541671654 1.5010396067080672E9	5.911409097433886 1.6469112463217483E9	5.911409097433886 -0.007899769315002136	11.39686395538952 2.6358031486882573E12
5.540735257097021 -0.23371684494605116	5.922544991081361 -0.628555416219645	5.540735257097021 1.5010721267640383E9	5.922544991081361 1.6542055781685045E9	5.922544991081361 -0.007920781004324806	11.422049282751422 2.9186821645653027E12
5.555294337503831 -0.23570129335511592	5.936223717522982 -0.6303258536775731	5.555294337503831 1.501106963028696E9	5.936223717522982 1.661835524422716E9	5.936223717522982 -0.00794123716981221	11.447246165573775 3.2277353412211987E12
5.569852883011901 -0.23773754249703583	5.950000166112863 -0.6318678490896916	5.569852883011901 1.5011441155020401E9	5.950000166112863 1.6684363527510328E9	5.950000166112863 -0.00795785687779682	11.472455430067985 3.562962678655946E12
5.584411118720968 -0.23982559237180556	5.96387666180759 -0.6331814024559934	5.584411118720968 1.5011835841840708E9	5.96387666180759 1.674008063153454E9	5.96387666180759 -0.007970640128277862	11.497677901228698 3.9243641768695435E12
5.597205959550202 -0.24171156896913448	5.977270374221458 -0.6342347656242788	5.597205959550202 1.501220608535653E9	5.977270374221458 1.6780749221158078E9	5.977270374221458 -0.007979115003525883	11.522220478950363 4.303799053767291E12
5.610001113977885 -0.24365302097009245	5.991516866800972 -0.6352345054636084	5.610001113977885 1.5012603830850236E9	5.991516866800972 1.6816784110461764E9	5.991516866800972 -0.00798592306791035	11.54677499506709 4.71324200118956E12
5.622796775283234 -0.24564994837467413	6.006702958145733 -0.6361806219739767	5.622796775283234 1.5013029078321826E9	6.006702958145733 1.6848185299445598E9	6.006702958145733 -0.00799106432143104	11.571342214716895 5.152693019136348E12
5.6355931367224965 -0.24770235118287953	6.017940556840439 -0.6368218280987916	5.6355931367224965 1.50134818277713E9	6.017940556840439 1.6867269293206794E9	6.017940556840439 -0.007993753813224869	11.595922901851505 5.622152107607657E12
5.646607210052643 -0.24952097822321573	6.030092456465552 -0.6374743738704955	5.646607210052643 1.5013898080212657E9	6.030092456465552 1.6885639906851184E9	6.030092456465552 -0.007996042764105038	11.619839198988355 6.110052732700589E12
5.657621269200635 -0.2513959479173993	6.043212904270468 -0.638138259289069	5.657621269200635 1.5014346036473694E9	6.043212904270468 1.6903297140378757E9	6.043212904270468 -0.00799793117407066	11.643767750887665 6.631361407336197E12
5.6686354374344745 -0.25332726026543906	6.052664355163255 -0.6385907541811067	5.6686354374344745 1.5014825696554406E9	6.052664355163255 1.6914525823047457E9	6.052664355163255 -0.007998928385836601	11.667709265882111 7.186078131514482E12
5.679649838018504 -0.25531491526732797	6.062726013970579 -0.6390381729575134	5.679649838018504 1.5015337060454795E9	6.062726013970579 1.6924440457534778E9	6.062726013970579 -0.007999490406232046	11.691664451154448 7.774202905235443E12
5.690106826243128 -0.25726278768473154	6.073413263935087 -0.6394805156182821	5.690106826243128 1.501585540242962E9	6.073413263935087 1.6933041043840723E9	6.073413263935087 -0.007999617235256551	11.71497056806659 8.380561506729277E12
5.700563590720238 -0.2592802611325977	6.081381618872967 -0.639779084869633	5.700563590720238 1.5016419771574888E9	6.081381618872967 1.6937182702886744E9	6.081381618872967 -0.007999146215277197	11.738289193847496 9.023084394665066E12
5.711020236930291 -0.2613673356109283	6.0897248188023605 -0.6400294278750787	5.711020236930291 1.50170301678906E9	6.0897248188023605 1.6936082459985852E9	6.0897248188023605 -0.007997215879026465	11.761620984008616 9.701771569042807E12
5.721476870357326 -0.26352401111972323	6.098447485604117 -0.6402315446346192	5.721476870357326 1.5017686591376758E9	6.098447485604117 1.6929740315138044E9	6.098447485604117 -0.007993826226504464	11.784966592952483 1.0416623029862498E13
5.733563360473324 -0.2661156006271428	6.106532857389394 -0.6404029676492238	5.733563360473324 1.5018503138315938E9	6.106532857389394 1.6923369834315E9	6.106532857389394 -0.007990609540193039	11.80776025543143 1.1151787751087775E13
5.745649225974496 -0.2688506828457795	6.114938555929757 -0.6406485192352251	5.745649225974496 1.5019429647791178E9	6.114938555929757 1.6923813905068524E9	6.114938555929757 -0.007989204087123336	11.830528733907945 1.192739239167454E13
5.757734629707829 -0.2717292577756334	6.123699920336946 -0.6409681993926144	5.757734629707829 1.5020466119802477E9	6.123699920336946 1.6931072527398608E9	6.123699920336946 -0.007989609867295355	11.853272601319926 1.2743436951622783E13
5.769819734538977 -0.2747513254167062	6.133655922562211 -0.6413960417265292	5.769819734538977 1.5021612554349835E9	6.133655922562211 1.6945334793746393E9	6.133655922562211 -0.007991722559207881	11.875992432467164 1.359992143093251E13
5.782092224552898 -0.27810033062118134	6.143930997518569 -0.6419122811999598	5.782092224552898 1.5022961322717476E9	6.143930997518569 1.6966483010603478E9	6.143930997518569 -0.007995440716638269	11.898140650079222 1.4476682366538133E13
5.794380663097816 -0.281604159741609	6.154537061181771 -0.6425169178128955	5.794380663097816 1.5024504974964926E9	6.154537061181771 1.6994517177969854E9	6.154537061181771 -0.008000764339585964	11.92026598371492 1.5396725792258576E13
5.806707672392899 -0.2852628127779857	6.166858494006393 -0.6433303504324668	5.806707672392899 1.5026243511092184E9	6.166858494006393 1.7035966635425336E9	6.166858494006393 -0.008009040834650705	11.942368964013662 1.6360051708093838E13
5.819095663352224 -0.2890762897303132	6.179359134152485 -0.6442828974325172	5.819095663352224 1.5028176931099253E9	6.179359134152485 1.7089233925064132E9	6.179359134152485 -0.008019624335075304	11.964450123226396 1.7366660114043918E13
5.830064437166014 -0.29251244589459713	6.192039773857473 -0.6453745588130415	5.830064437166014 1.5030083373124027E9	6.192039773857473 1.7154319046886237E9	6.192039773857473 -0.008032514840859428	11.985971153916491 1.839231845923421E13
5.841014110187755 -0.29592269958946904	6.204699207571722 -0.6466257233875607	5.841014110187755 1.503212403945893E9	6.204699207571722 1.7233635501639376E9	6.204699207571722 -0.008047988472347334	12.007471402207006 1.946344097629819E13
5.85196051732826 -0.29930705081493425	6.21725931886738 -0.6480273243591066	5.85196051732826 1.5034298930103965E9	6.21725931886738 1.7329081394957538E9	6.21725931886738 -0.008065810440592514	12.028951359088868 2.0580027665235855E13
5.862919507655202 -0.30266549957099453	6.229724788704631 -0.6495793617276666	5.862919507655202 1.5036608045059133E9	6.229724788704631 1.7440656726840723E9	6.229724788704631 -0.008085980745594412	12.050411516945756 2.1742078526047203E13
5.873032881312611 -0.3056586715947285	6.240273736257067 -0.6510554726848694	5.873032881312611 1.5038844511656296E9	6.240273736257067 1.7553461726843836E9	6.240273736257067 -0.008105464159963827	12.071323176433557 2.292045891509367E13
5.883105517295349 -0.3084861046311351	6.250593760101427 -0.6526379612923803	5.883105517295349 1.5041076757323422E9	6.250593760101427 1.7682372273342865E9	6.250593760101427 -0.008126525604835955	12.0922159716899 2.414462615992777E13
5.893149646000205 -0.31114779868020914	6.260703449293685 -0.6543268275501886	5.893149646000205 1.5043304782060509E9	6.260703449293685 1.78273883663378E9	6.260703449293685 -0.008149165080210352	12.113090356622278 2.5414580260549492E13
5.903177602129505 -0.3136437537419594	6.2693603710569805 -0.6559118575508913	5.903177602129505 1.5045528585867558E9	6.2693603710569805 1.7972041196955855E9	6.2693603710569805 -0.008170512036147937	12.133946786340205 2.673032121695884E13
5.913885201996686 -0.31597985523092387	6.277805093163488 -0.657566847063852	5.913885201996686 1.5047724980042124E9	6.277805093163488 1.8132704662880483E9	6.277805093163488 -0.008192839907989136	12.154266455084349 2.805747517967513E13
5.924607941952536 -0.31816748734069744	6.286072624544201 -0.6592917960890583	5.924607941952536 1.5049867904607174E9	6.286072624544201 1.8309378764111676E9	6.286072624544201 -0.008216148695732839	12.17456900863532 2.9428349940542066E13
5.935357443519665 -0.32020665007127835	6.293089524583041 -0.6608562449540996	5.935357443519665 1.5051957359562712E9	6.293089524583041 1.8479467194841688E9	6.293089524583041 -0.008237292785226003	12.19485486628572 3.084294549955965E13
5.946145241731459 -0.32209734342267193	6.300004387862044 -0.6624610406257831	5.946145241731459 1.5053993344908733E9	6.300004387862044 1.866434868811359E9	6.300004387862044 -0.008258958229769742	12.215124448364254 3.2301261856727875E13
5.9584136861802035 -0.3241276404691993	6.306862160437409 -0.6641061831041037	5.9584136861802035 1.5056269647235343E9	6.306862160437409 1.8864023243927376E9	6.306862160437409 -0.008281145029363945	12.234869076601202 3.37637299491152E13
5.970667354175093 -0.32604628731575236	6.312834718093026 -0.6655875636206643	5.970667354175093 1.505850047450162E9	6.312834718093026 1.90540940921166E9	6.312834718093026 -0.008301082889882183	12.254598183042097 3.526537607901242E13
5.982923476368565 -0.32785328396233115	6.318837311379874 -0.6670919056445834	5.982923476368565 1.5060685826707563E9	6.318837311379874 1.9257753476109416E9	6.318837311379874 -0.008321280107411733	12.274312154727992 3.680620024641953E13
5.995199273078711 -0.3295486304089339	6.324913774965213 -0.6686192091758683	5.995199273078711 1.5062825703853173E9	6.324913774965213 1.9475001395905828E9	6.324913774965213 -0.008341736681952039	12.294011379592025 3.838620245133654E13
6.007744799551805 -0.3311983949159343	6.3309350473483414 -0.670127711255831	6.007744799551805 1.5064976848265429E9	6.3309350473483414 1.9701141433063407E9	6.3309350473483414 -0.008361873715402979	12.313197483843538 3.996129093326168E13
6.020238610547669 -0.33276257693273426	6.337128196599875 -0.6716527174618756	6.020238610547669 1.506707548916218E9	6.337128196599875 1.994247769522539E9	6.337128196599875 -0.008382157323142847	12.332369516749782 4.156884116209445E13
6.03269881288205 -0.33424117645932494	6.343538060787437 -0.6731942277940073	6.03269881288205 1.506912162654343E9	6.343538060787437 2.0199010182391763E9	6.343538060787437 -0.008402587505172088	12.351527835351947 4.3208853137834875E13
6.045143660069821 -0.3356341934957099	6.350521803421652 -0.6748091624736725	6.045143660069821 1.5071115260409172E9	6.350521803421652 2.048266865579679E9	6.350521803421652 -0.008423888662868029	12.37067279745851 4.488132686048293E13
6.0574906443697865 -0.33695210158550015	6.357872761361222 -0.6764323801109837	6.0574906443697865 1.5073045027341018E9	6.357872761361222 2.07843252920029E9	6.357872761361222 -0.008445186212370559	12.389316264272379 4.653862861437194E13
6.069863766792364 -0.3382171995572216	6.365635925656725 -0.6780638807059338	6.069863766792364 1.5074939034082568E9	6.365635925656725 2.1103980091010087E9	6.365635925656725 -0.008466480153679456	12.40794697940382 4.822016899236139E13
6.082285180973471 -0.33942948741087253	6.374051555880717 -0.6797139611142926	6.082285180973471 1.5076797280633826E9	6.374051555880717 2.1445978125247436E9	6.374051555880717 -0.00848787015126462	12.426565272019918 4.992594799445128E13
6.094776783617934 -0.3405889651464564	6.383034370889477 -0.6813547298421616	6.094776783617934 1.5078619766994786E9	6.383034370889477 2.180483666739033E9	6.383034370889477 -0.008508974420334492	12.445171471947068 5.165596562064162E13
6.10512858779945 -0.34151711030597465	6.39261979038652 -0.6829861868895426	6.10512858779945 1.508010189948448E9	6.39261979038652 2.2180555717438774E9	6.39261979038652 -0.008529792960888849	12.463287656517576 5.3360223215994375E13
6.11547292216822 -0.3424148777668323	6.402860867856496 -0.6845753061730049	6.11547292216822 1.508155671554322E9	6.402860867856496 2.256704920971644E9	6.402860867856496 -0.00854986015598258	12.481392289437046 5.50795969682437E13
6.12582259476768 -0.3432822675290277	6.413829667520671 -0.686116900982138	6.12582259476768 1.5082984215171013E9	6.413829667520671 2.295822050957949E9	6.413829667520671 -0.00856906445359673	12.49948567400355 5.681408687738959E13
6.136190393857256 -0.3441192795925625	6.425550232052097 -0.6876109713169436	6.136190393857256 1.5084384398367853E9	6.425550232052097 2.3354069617027917E9	6.425550232052097 -0.008587405853731411	12.517568114081165 5.856369294343206E13
6.144992269063671 -0.34481013248090076	6.438761864952889 -0.6890481935784001	6.144992269063671 1.5085552260809731E9	6.438761864952889 2.3749217299332037E9	6.438761864952889 -0.008604554459709757	12.535171966792152 6.027740856240388E13
6.153773164166542 -0.3454800809904013	6.451301078042937 -0.6903055205396429	6.153773164166542 1.508669532308715E9	6.451301078042937 2.4102036182714615E9	6.451301078042937 -0.008619226951723458	12.55276535844843 6.19967581437136E13
6.162540863291133 -0.3461291251210623	6.463181656699185 -0.6913829522006614	6.162540863291133 1.5087813585200114E9	6.463181656699185 2.4412526267175646E9	6.463181656699185 -0.008631423329772514	12.57034856837026 6.372174168736123E13
6.171303185731245 -0.3467572648728856	6.478364358653833 -0.692669412504844	6.171303185731245 1.5088907047148614E9	6.478364358653833 2.4789978555106606E9	6.478364358653833 -0.008645562112086114	12.587921876363403 6.545235919334674E13
6.179283270744484 -0.34731370858517874	6.492728105731886 -0.6938217491015104	6.179283270744484 1.5089882224015577E9	6.492728105731886 2.5133359626374145E9	6.492728105731886 -0.008657881769412956	12.605027932131138 6.713790463005064E13
6.187234542080316 -0.34784938876038485	6.506313298626768 -0.6948399619906516	6.187234542080316 1.5090824310498803E9	6.506313298626768 2.5442669480978255E9	6.506313298626768 -0.008668382301753041	12.622124517477962 6.881962575942912E13
6.195162754250335 -0.34836430539850216	6.523325547905456 -0.6960758219567937	6.195162754250335 1.5091733306598294E9	6.523325547905456 2.5824400611808634E9	6.523325547905456 -0.008680830173931064	12.639211889523962 7.049752258148214E13
6.203073712086714 -0.3488584584995307	6.539829733427649 -0.6972523364587806	6.203073712086714 1.5092609212314045E9	6.539829733427649 2.619794190759889E9	6.539829733427649 -0.008692488943051857	12.656290305805351 7.217159509620972E13
6.209702835948787 -0.3492461119982364	6.555895699242803 -0.698369505496605	6.209702835948787 1.5093289449065359E9	6.555895699242803 2.656329336834903E9	6.555895699242803 -0.008703358609115086	12.672912698029418 7.379263432491411E13
6.216367112131794 -0.34962715180059956	6.57155593035652 -0.6994821864812826	6.216367112131794 1.5093958707838683E9	6.57155593035652 2.6940833802741675E9	6.57155593035652 -0.008714274667923738	12.689526519249965 7.540059589336925E13
6.223084138981229 -0.3500015779066237	6.587523130024101 -0.7006278884417663	6.223084138981229 1.5094616988634017E9	6.587523130024101 2.734688812611483E9	6.587523130024101 -0.008725562195101677	12.706132006053643 7.699547980157511E13
6.22987110451353 -0.35036939031630343	6.603811675877647 -0.7018066113780508	6.22987110451353 1.509526429145136E9	6.603811675877647 2.7781456338468494E9	6.603811675877647 -0.00873722119064868	12.722729395383514 7.857728604953172E13
6.23655342260313 -0.3507275908057972	6.616668416821834 -0.7027594395861874	6.23655342260313 1.509589632361163E9	6.616668416821834 2.8148313924043074E9	6.616668416821834 -0.008746762423105015	12.738881868172848 8.009945937755847E13
6.24323574069273 -0.35108614963829954	6.6300176560138135 -0.703748941729903	6.24323574069273 1.5096533638410103E9	6.6300176560138135 2.854287155266775E9	6.6300176560138135 -0.008756675054048091	12.755026586218367 8.159952895186767E13
6.249935522530233 -0.3514450668138176	6.643859531452342 -0.7047751178091959	6.249935522530233 1.5097176235846782E9	6.643859531452342 2.896512922434252E9	6.643859531452342 -0.008766959083477466	12.77116376713248 8.307749477245934E13
6.256670096006649 -0.35180434233235136	6.654610524378475 -0.705570911643254	6.256670096006649 1.5097824115921664E9	6.654610524378475 2.9303421778350344E9	6.654610524378475 -0.008774934010672752	12.787293628832654 8.453335683933347E13
6.263404669483065 -0.35216609379672814	6.665766383388687 -0.7063823310177932	6.263404669483065 1.5098482392913108E9	6.665766383388687 2.9656230261207952E9	6.665766383388687 -0.0087830034473656	12.802989547910313 8.592415970695173E13
6.270104451320569 -0.3525331245837746	6.677329027763613 -0.7072093759328171	6.270104451320569 1.5099159602913532E9	6.677329027763613 3.0023554672915335E9	6.677329027763613 -0.00879116739355612	12.818678452757249 8.728397711993633E13
6.27678676941017 -0.3529054346934961	6.686361143359491 -0.7078409152511922	6.27678676941017 1.509985574592294E9	6.686361143359491 3.0309636785829935E9	6.686361143359491 -0.008797338170709157	12.834360543467183 8.861280907828725E13
6.28346908749977 -0.35328302412589263	6.695684498992951 -0.7084715864042197	6.28346908749977 1.510057082194133E9	6.695684498992951 3.059823035416815E9	6.695684498992951 -0.008803399772645326	12.850036020394777 8.99106555820045E13
6.2902560530320715 -0.3536770268230347	6.705300821648311 -0.709101389391896	6.2902560530320715 1.5101328162658927E9	6.705300821648311 3.0889335377929955E9	6.705300821648311 -0.00880935219936485	12.86542787663303 9.115031191883933E13
6.296973079881507 -0.35408653644976607	6.713215856299179 -0.7095967265702372	6.296973079881507 1.5102133436976414E9	6.713215856299179 3.1119209835137897E9	6.713215856299179 -0.008813917789496362	12.880813273284295 9.234941882336034E13
6.303637356064514 -0.3545115530060867	6.721349448848649 -0.7100745982205767	6.303637356064514 1.510298664489379E9	6.721349448848649 3.133823555709326E9	6.721349448848649 -0.008818134288487767	12.896192399369726 9.350797629556753E13
6.310266479926587 -0.3549520764919949	6.729702800592766 -0.7105350043429199	6.310266479926587 1.5103887786411057E9	6.729702800592766 3.1546412543796034E9	6.729702800592766 -0.008822001696338844	12.911565444141775 9.46259843354609E13
6.317679611989023 -0.3554965394725338	6.738231585515459 -0.7109542297771432	6.317679611989023 1.5105034635327983E9	6.738231585515459 3.1725631039176097E9	6.738231585515459 -0.008825133635855575	12.927130738996949 9.57118442873836E13
6.325093269705013 -0.35607205942846054	6.746856404761076 -0.7113664140431935	6.325093269705013 1.5106277702809212E9	6.746856404761076 3.190048963705425E9	6.746856404761076 -0.008828097974274751	12.942689710458453 9.674391441169438E13
6.332507856554972 -0.35667863635978225	6.75563260043926 -0.7117715571410637	6.332507856554972 1.510761698885475E9	6.75563260043926 3.2070988337430487E9	6.75563260043926 -0.008830894711596704	12.958242554290878 9.772219470839327E13
6.339923775867663 -0.3573162702665025	6.765848094205214 -0.7122464516501816	6.339923775867663 1.510905249346459E9	6.765848094205214 3.2274804222847986E9	6.765848094205214 -0.008834220646745328	12.973789466490294 9.864668517748025E13
6.3477281870419535 -0.35801405522067054	6.776315705062331 -0.712742257957518	6.3477281870419535 1.5110653535010831E9	6.776315705062331 3.2494712444332533E9	6.776315705062331 -0.0088377859951706	12.989569382493258 9.95247378957438E13
6.355532239597956 -0.3587373588689138	6.787080137815728 -0.7132589760630532	6.355532239597956 1.511235325781886E9	6.787080137815728 3.2730713001884127E9	6.787080137815728 -0.008841590756872075	13.005343090383569 1.0033362970655464E14
6.363336404018067 -0.3594861812112322	6.799520449348951 -0.7138789518828323	6.363336404018067 1.5114151661888683E9	6.799520449348951 3.3026220830131154E9	6.799520449348951 -0.008846392642175571	13.021110794385324 1.010733606099128E14
6.371141150764456 -0.36026052224762584	6.8122868110136405 -0.7145408554026202	6.371141150764456 1.5116048747220292E9	6.8122868110136405 3.335785219147675E9	6.8122868110136405 -0.008851748187070796	13.03687269895599 1.0174393060581825E14
6.380413303969335 -0.3612103704117411	6.8254067891304615 -0.715244686622408	6.380413303969335 1.5118423918957477E9	6.8254067891304615 3.37256070859209E9	6.8254067891304615 -0.008857657391557083	13.052870182089313 1.0234793591825277E14
6.389683374427585 -0.36219295482339486	6.840700646974941 -0.7161082054852246	6.389683374427585 1.5120957229934537E9	6.840700646974941 3.419957953238712E9	6.840700646974941 -0.008865257675173877	13.068861584792117 1.0286657447324489E14
6.398952150349419 -0.3632082754825836	6.8562660018556665 -0.717031895335551	6.398952150349419 1.5123648680151472E9	6.8562660018556665 3.47365601375132E9	6.8562660018556665 -0.008873696408237763	13.084847120068698 1.0329984627079464E14
6.408220420275329 -0.36425633238931443	6.872115628735394 -0.7180157561733767	6.408220420275329 1.512649826960828E9	6.872115628735394 3.5336548901299124E9	6.872115628735394 -0.008882973590748078	13.100827001157985 1.0364775131090198E14
6.418833501972891 -0.36550294595207955	6.888460336882873 -0.7190886656000925	6.418833501972891 1.5129979975909977E9	6.888460336882873 3.602715072033375E9	6.888460336882873 -0.008893433609403978	13.117045032952843 1.0390816015864894E14
6.429446724893321 -0.36678652564662517	6.904827161768578 -0.7202163154224293	6.429446724893321 1.5133705706438594E9	6.904827161768578 3.6796255779399867E9	6.904827161768578 -0.00890469218041956	13.133257124845832 1.0406924336995188E14
6.440060132063657 -0.36810707147294774	6.921217713902819 -0.7213987056403743	6.440060132063657 1.5137675461194127E9	6.921217713902819 3.7643864078497477E9	6.921217713902819 -0.00891674930379438	13.149463498952047 1.041310009448108E14
6.450673766508696 -0.36946458343104727	6.935643873024082 -0.72249346589295	6.450673766508696 1.5141889240176582E9	6.935643873024082 3.847258758887436E9	6.935643873024082 -0.008928131720680188	13.165664377621761 1.040934328832257E14
6.4633708349544685 -0.3711283710017712	6.949868043143314 -0.7236162420567256	6.4633708349544685 1.5147228838693385E9	6.949868043143314 3.9366977771199017E9	6.949868043143314 -0.008939952057083755	13.182105978582841 1.0395136793577155E14
6.4760679581754985 -0.3728290569895867	6.963890731823371 -0.7247670341316939	6.4760679581754985 1.5152967337645276E9	6.963890731823371 4.032703462547142E9	6.963890731823371 -0.008952210313004638	13.198541793468186 1.0370432364154403E14
6.4887652098445425 -0.37456664139449547	6.975856463865379 -0.7257907699257826	6.4887652098445425 1.5159104737032251E9	6.975856463865379 4.1224082559570208E9	6.975856463865379 -0.008963224313818796	13.214972053844647 1.0335230000054314E14
6.501462663632121 -0.37634112421649046	6.987528036256537 -0.7268205307081326	6.501462663632121 1.516564103685431E9	6.987528036256537 4.216672906932879E9	6.987528036256537 -0.008974367205795142	13.23139699151401 1.0289529701276886E14
6.516617729126362 -0.37849839799356655	6.998909487735836 -0.7278563164787295	6.516617729126362 1.5173934503368278E9	6.998909487735836 4.315497415474714E9	6.998909487735836 -0.008985638988932787	13.24806522522352 1.0232893544901512E14
6.531772622119005 -0.3806934613439852	7.008801912053973 -0.7287872963871971	6.531772622119005 1.5182942880339465E9	7.008801912053973 4.4081920474800415E9	7.008801912053973 -0.00899581298122365	13.264727840439033 1.0167177637666577E14
6.546927467876095 -0.3829263142677428	7.018377096519282 -0.7297092852013067	6.546927467876095 1.5192666167767873E9	7.018377096519282 4.503502906849771E9	7.018377096519282 -0.009005903729870757	13.281385078531008 1.0092381979572077E14
6.562082391664848 -0.3851969567648377	7.027644575893195 -0.730622282921046	6.562082391664848 1.5203104365653498E9	7.027644575893195 4.601429993583898E9	7.027644575893195 -0.009015911234873886	13.298037181103723 1.0008506570618014E14
6.579679122280463 -0.38787372959532096	7.035793862287317 -0.731445457203562	6.579679122280463 1.52160898334326E9	7.035793862287317 4.693003137946042E9	7.035793862287317 -0.009024935145544921	13.314935159084932 9.916025308021875E13
6.597275228199843 -0.3905963612795569	7.043647536869191 -0.7322489696252772	6.597275228199843 1.523044501888438E9	7.043647536869191 4.785261812031889E9	7.043647536869191 -0.0090337266770939	13.331827700376863 9.819341358544545E13
6.61487090548706 -0.39336485181755254	7.051223045198938 -0.7330328201861791	6.61487090548706 1.5246169922008834E9	7.051223045198938 4.878206015841435E9	7.051223045198938 -0.009042285829520158	13.348715056516934 9.718454722186027E13
6.632466350220514 -0.3961792012093026	7.057893035924164 -0.7337312442015991	6.632466350220514 1.5263264542805965E9	7.057893035924164 4.963558060838107E9	7.057893035924164 -0.009049884588445911	13.36559747927433 9.613365398946319E13
6.650071189947749 -0.3990379447092822	7.064332741308326 -0.7344034846835461	6.650071189947749 1.5281738222237546E9	7.064332741308326 5.047841370133772E9	7.064332741308326 -0.009057159932932102	13.382728366701508 9.5061909109164E13
6.667676623844433 -0.40196173071778585	7.070569507353068 -0.7350495416320042	6.667676623844433 1.5302516393978152E9	7.070569507353068 5.131055943728432E9	7.070569507353068 -0.009064111862977953	13.399854013946376 9.402098679798225E13
6.685283236487297 -0.4049505592348188	7.0759775730307295 -0.7356038427183167	6.685283236487297 1.5325599058027787E9	7.0759775730307295 5.204137824134441E9	7.0759775730307295 -0.009070029365791599	13.416974683088904 9.301088705591789E13
6.702891612335674 -0.4080044302603758	7.081261991844358 -0.7361309937621554	6.702891612335674 1.5350986214386446E9	7.081261991844358 5.274990611757987E9	7.081261991844358 -0.009075606259525193	13.434090636437741 9.203160988297094E13
6.721083138259056 -0.41124226336232805	7.086456340185058 -0.7366309947635168	6.721083138259056 1.5379657254778273E9	7.086456340185058 5.343614306599067E9	7.086456340185058 -0.009080842544178847	13.451457632515082 9.110492412493567E13
6.739274008988284 -0.4145915116951153	7.09102997715189 -0.7370517277316706	6.739274008988284 1.5413023075491645E9	7.09102997715189 5.402323475347734E9	7.09102997715189 -0.009085188942603128	13.468819600129153 9.02545484145438E13
6.757464869248763 -0.4180521752587465	7.095590077010316 -0.7374481066683076	6.757464869248763 1.545108367652656E9	7.095590077010316 5.458372416525889E9	7.095590077010316 -0.009089226904052783	13.486176812289916 8.948048275179533E13
6.775656363767014 -0.42162425405321446	7.100169216788348 -0.7378201315734225	6.775656363767014 1.549383905788302E9	7.100169216788348 5.511761130133531E9	7.100169216788348 -0.00909295642852781	13.503529542231782 8.878272713669027E13
6.79296931382969 -0.4251478448317618	7.104683764998703 -0.7381558209350834	6.79296931382969 1.5539024532880168E9	7.104683764998703 5.560470263283348E9	7.104683764998703 -0.009096246928210094	13.521135871753636 8.815592700321334E13
6.810280559347694 -0.428829237491283	7.109288508147707 -0.7384674018958917	6.810280559347694 1.5593360110954344E9	7.109288508147707 5.606039184841567E9	7.109288508147707 -0.009099228791656255	13.538737400277226 8.759878287077844E13
6.827590655856873 -0.4326684320317833	7.114016168088879 -0.7387548744558474	6.827590655856873 1.5656845792105546E9	7.114016168088879 5.648467894808184E9	7.114016168088879 -0.009101902018866626	13.556334412141828 8.711129473938558E13
6.844900159003701 -0.4366654284532574	7.119179935835944 -0.7390270403719983	6.844900159003701 1.5729481576333773E9	7.119179935835944 5.688822791748436E9	7.119179935835944 -0.00910432843009823	13.573927191905716 8.669346260903473E13
6.862795427501487 -0.44106033008183143	7.124569831594 -0.7392728687288885	6.862795427501487 1.5816199250587502E9	7.124569831594 5.725260805152852E9	7.124569831594 -0.009106414614590719	13.591776164412293 8.632440298369797E13
6.880690193669609 -0.4456490120834582	7.130219389807967 -0.7394923595265235	6.880690193669609 1.5924532000211306E9	7.130219389807967 5.757781935021428E9	7.130219389807967 -0.009108160572343538	13.609620579656637 8.599765848758016E13
6.898588348443223 -0.45043147445814835	7.136424614180133 -0.7396888079323718	6.898588348443223 1.6054479825205188E9	7.136424614180133 5.786586191329534E9	7.136424614180133 -0.009109574749046168	13.627460733721962 8.571322912068128E13
6.916493780548406 -0.4554077172058948	7.143005471784326 -0.7398600139520903	6.916493780548406 1.6206042725569146E9	7.143005471784326 5.8111440331908E9	7.143005471784326 -0.009110657269409295	13.645296922903697 8.547111488300136E13
6.9320868173141195 -0.4598758938296337	7.14998971333527 -0.7400059775856773	6.9320868173141195 1.6359174807162452E9	7.14998971333527 5.831455460605223E9	7.14998971333527 -0.009111408133432475	13.663391878339059 8.52507449152117E13
6.947674334491555 -0.4644906149849506	7.158018989624887 -0.7401303188556865	6.947674334491555 1.6548472532725568E9	7.158018989624887 5.847370863113265E9	7.158018989624887 -0.00911180952934254	13.681482537105918 8.504711741178516E13
6.963258900645987 -0.4692518806718562	7.165716391429518 -0.740227635412638	6.963258900645987 1.6773935902258492E9	7.165716391429518 5.858643500564087E9	7.165716391429518 -0.009111944934295901	13.699569207459389 8.486023237272169E13
6.978843085801845 -0.4741596908903434	7.173083516866311 -0.740297927256532	6.978843085801845 1.7035564915761228E9	7.173083516866311 5.8652733729576845E9	7.173083516866311 -0.009111814348292335	13.717652197858555 8.469008979802133E13
6.993575887789272 -0.4790978636513836	7.1825013282810755 -0.7403674405785265	6.993575887789272 1.7335387945632708E9	7.1825013282810755 5.869650361179279E9	7.1825013282810755 -0.00911140170498459	13.735996508730466 8.452178545636588E13
7.0083061540008424 -0.4841408249664818	7.1914280254506755 -0.7404204098381646	7.0083061540008424 1.7707576417326531E9	7.1914280254506755 5.870821199414582E9	7.1914280254506755 -0.009110829250038033	13.754336801002786 8.435205441508267E13
7.023076425178114 -0.48928857483563437	7.199864262383122 -0.7404568350354248	7.023076425178114 1.8152130330842698E9	7.199864262383122 5.868785887663592E9	7.199864262383122 -0.009110096983452443	13.772673395544496 8.418089667417172E13
7.037928898317625 -0.4945411132588431	7.209194639086964 -0.7404877927529947	7.037928898317625 1.8669049686181204E9	7.209194639086964 5.8636336034517355E9	7.209194639086964 -0.009109113530941682	13.791006613418729 8.400831223363303E13
7.051891903695662 -0.49949625064147707	7.218020578724277 -0.7405112298497896	7.051891903695662 1.9244702118160775E9	7.218020578724277 5.856388622935038E9	7.218020578724277 -0.009108023640295393	13.809603689730372 8.382343186810822E13
7.0657822129927155 -0.5043935138100677	7.226344558427108 -0.7405271463257952	7.0657822129927155 1.9922069141005619E9	7.226344558427108 5.847050946113497E9	7.226344558427108 -0.009106827311513022	13.828197043639518 8.362439047661844E13
7.079634910067831 -0.5092329027646096	7.2339480579647155 -0.7405385041072021	7.079634910067831 2.0701150754715736E9	7.2339480579647155 5.836208141863877E9	7.2339480579647155 -0.009105560657562517	13.846787009085864 8.341118805916372E13
7.093485364603637 -0.5140144175051082	7.241285979084575 -0.7405474550299536	7.093485364603637 2.1581946959291124E9	7.241285979084575 5.823837293340162E9	7.241285979084575 -0.009104173909165847	13.865373920191736 8.318382461574406E13
7.10460331039999 -0.5177592817735865	7.248380729087775 -0.7405539990940389	7.10460331039999 2.238280990699384E9	7.248380729087775 5.809938400542349E9	7.248380729087775 -0.009102667066322234	13.884227215475441 8.293303496070756E13
7.115731652150726 -0.5214283662869965	7.25464076512095 -0.7405586391732699	7.115731652150726 2.327212711773128E9	7.25464076512095 5.795773870726205E9	7.25464076512095 -0.009101155269493955	13.903077103377179 8.26587001381326E13
7.126883905429828 -0.5250216710453381	7.2609209174290665 -0.7405624777810855	7.126883905429828 2.424989859150345E9	7.2609209174290665 5.780072160012651E9	7.2609209174290665 -0.009099479422186696	13.921923931380105 8.236082014801919E13
7.138073499165569 -0.528539196048615	7.267259762129694 -0.7405655149174786	7.138073499165569 2.5316124328310337E9	7.267259762129694 5.762833268401689E9	7.267259762129694 -0.009097639524400347	13.94076804713665 8.203939499036731E13
7.148319835663531 -0.531666736704655	7.273425366520211 -0.7405678996290996	7.148319835663531 2.638060719708473E9	7.273425366520211 5.744552884158759E9	7.273425366520211 -0.00909567493944563	13.959941465157021 8.168405906898345E13
7.1585540457808685 -0.5347097681224264	7.279873672104997 -0.7405698254509252	7.1585540457808685 2.752879340267617E9	7.279873672104997 5.724040986141048E9	7.279873672104997 -0.009093443525216127	13.979111790477315 8.129802695645466E13
7.168786567456735 -0.5376682903019221	7.286642177990059 -0.7405712923829411	7.168786567456735 2.8760682945084667E9	7.286642177990059 5.701297574348551E9	7.286642177990059 -0.009090945281711393	13.99827938805015 8.088129865278092E13
7.179027843792877 -0.540542303243142	7.293418309098015 -0.7405722178906329	7.179027843792877 3.007627582431021E9	7.293418309098015 5.676756538363033E9	7.293418309098015 -0.00908821789134262	14.017444622983973 8.043387415796227E13
7.188553555554262 -0.5431338267844508	7.300678425212846 -0.7405719272939608	7.188553555554262 3.137885371509559E9	7.300678425212846 5.645215932802249E9	7.300678425212846 -0.009084659266073603	14.03704460282886 7.994172691561302E13
7.19805217161795 -0.5456535567583147	7.308445343991214 -0.7405704205929267	7.19805217161795 3.275918406283795E9	7.308445343991214 5.606675757666198E9	7.308445343991214 -0.009080269405904229	14.056641801349514 7.941395088753992E13
7.207531990592483 -0.5481014931647339	7.3157657459772825 -0.7405686172391119	7.207531990592483 3.4217266867537284E9	7.3157657459772825 5.568128929278445E9	7.3157657459772825 -0.00907575809975436	14.076236607768593 7.8850546073743E13
7.21700136050577 -0.5504776360037065	7.322629408381387 -0.7405676295006449	7.21700136050577 3.5753102129193606E9	7.322629408381387 5.535292394487617E9	7.322629408381387 -0.00907184220458701	14.095829411451314 7.825151247422227E13
7.226552984156579 -0.5528006427922945	7.329055979952385 -0.7405674573775274	7.226552984156579 3.73754765707252E9	7.329055979952385 5.508166153293712E9	7.329055979952385 -0.009068521720401734	14.115866636568587 7.760072083776881E13
7.236109935620758 -0.5550800745407516	7.3350219480198025 -0.7405673753026472	7.236109935620758 3.9101536227351947E9	7.3350219480198025 5.483257694544934E9	7.3350219480198025 -0.009065422848503313	14.135901428668332 7.691235013244545E13
7.245677419907604 -0.5573159312490761	7.340649744152145 -0.7405673288768329	7.245677419907604 4.0931281099073863E9	7.340649744152145 5.4598572436873665E9	7.340649744152145 -0.00906246886404416	14.155934202864426 7.61864003582522E13
7.255260624864085 -0.5595082129172662	7.345966964759786 -0.7405673181000738	7.255260624864085 4.286471118589093E9	7.345966964759786 5.437964800721009E9	7.345966964759786 -0.00905965976702372	14.175965374396199 7.542287151518906E13
7.264911828119313 -0.5616802233408515	7.35085499340339 -0.7405673040902139	7.264911828119313 4.492397505467384E9	7.35085499340339 5.4178959804991455E9	7.35085499340339 -0.009057048449226168	14.196449597527732 7.460340992810934E13
7.274557778446042 -0.5638268479285466	7.355542457174064 -0.7405673276274642	7.274557778446042 4.712509842579582E9	7.355542457174064 5.398823241361099E9	7.355542457174064 -0.009054535852219159	14.216931776195631 7.374732168250044E13
7.284203810163089 -0.5659480866803497	7.36006091117283 -0.7405673887118107	7.284203810163089 4.946808129925687E9	7.36006091117283 5.3807465833068695E9	7.36006091117283 -0.009052121976002359	14.237412353057639 7.285460677836231E13
7.293855257454322 -0.5680439395962589	7.364412965561488 -0.7405675170115922	7.293855257454322 5.195292367505699E9	7.364412965561488 5.363722092336331E9	7.364412965561488 -0.00904981952352979	14.257891770875364 7.192526521569497E13
7.303586067664976 -0.5701355025765737	7.368683000139134 -0.7405677672533502	7.303586067664976 5.461375922686339E9	7.368683000139134 5.347484307555481E9	7.368683000139134 -0.00904759936676336	14.278832928990678 7.093841364589225E13
7.31330067025774 -0.5722044607343308	7.372902209664276 -0.7405681394370758	7.31330067025774 5.745643365038371E9	7.372902209664276 5.332033228964317E9	7.372902209664276 -0.009045461505701957	14.299772474619985 6.9918080129465734E13
7.3230044960515155 -0.5742508140695337	7.377479533819297 -0.740568760323753	7.3230044960515155 6.048094694561794E9	7.377479533819297 5.316196047411482E9	7.377479533819297 -0.00904324518334576	14.320710879718233 6.8864264666415414E13
7.33270299396911 -0.5762745625821841	7.382076971581494 -0.7405696856240036	7.33270299396911 6.368729911256608E9	7.382076971581494 5.301127866695221E9	7.382076971581494 -0.009041116301123697	14.341648616317489 6.77769672567413E13
7.343451384235845 -0.5784781702395163	7.386725894633717 -0.7405709153378206	7.343451384235845 6.742601796904106E9	7.386725894633717 5.286828686815533E9	7.386725894633717 -0.009039074859035323	14.363056839109387 6.663248334004185E13
7.354203767655367 -0.5806658060732852	7.392089260624017 -0.740572826166491	7.354203767655367 7.146552078941569E9	7.392089260624017 5.271778038671127E9	7.392089260624017 -0.009036905872929268	14.384463928278366 6.545900900586321E13
7.364962955597974 -0.5828374700834908	7.397580182249855 -0.7405754787208574	7.364962955597974 7.580580757368997E9	7.397580182249855 5.257647370957875E9	7.397580182249855 -0.00903485520589109	14.405870386937076 6.425654425420536E13
7.375731754104671 -0.5849931622701297	7.403225188993677 -0.7405788730009144	7.375731754104671 8.044687832186387E9	7.403225188993677 5.244436683675774E9	7.403225188993677 -0.009032922857920456	14.42727671824262 6.30250890850683E13
7.387796232811881 -0.5873962860650677	7.4097027647537415 -0.740583833352928	7.387796232811881 8.599910915732784E9	7.4097027647537415 5.231012073736441E9	7.4097027647537415 -0.009030950290139117	14.449162339434945 6.1738052028103695E13
7.399857806624138 -0.5897981159512176	7.41638639193127 -0.7405905394280365	7.399857806624138 9.211922369304005E9	7.41638639193127 5.218709704250064E9	7.41638639193127 -0.009029137785161123	14.47104735653907 6.042741887219902E13
7.411920437729434 -0.592198651928574	7.423291906171694 -0.7405989912262276	7.411920437729434 9.880722192900045E9	7.423291906171694 5.207529575216641E9	7.423291906171694 -0.009027485342986141	14.492932305800073 5.9093189617354266E13
7.423988087274332 -0.594597893997137	7.4311938823041555 -0.7406111948190839	7.423988087274332 1.060631038652091E10	7.4311938823041555 5.196635102541914E9	7.4311938823041555 -0.009025878861756653	14.514817723468015 5.7735364263569414E13
7.4379817662840475 -0.5973894108879056	7.4393265527851655 -0.7406277365932015	7.4379817662840475 1.1519692091215288E10	7.4393265527851655 5.187246491884355E9	7.4393265527851655 -0.00902449375529546	14.53719129005571 5.632489730402593E13
7.451959227935047 -0.6002007536195348	7.447696166221873 -0.7406486165485662	7.451959227935047 1.2556227628770308E10	7.447696166221873 5.179363743243959E9	7.447696166221873 -0.009023330023602005	14.559564836917941 5.489743535005944E13
7.465926624056251 -0.6030319221920193	7.457391021137525 -0.7406798246645439	7.465926624056251 1.371591699918597E10	7.457391021137525 5.172600648253703E9	7.457391021137525 -0.009022333067832289	14.581938935528514 5.345297840166993E13
7.479890119780146 -0.6058829166053679	7.467283640947739 -0.7407231977300723	7.479890119780146 1.4998760202462276E10	7.467283640947739 5.168429004936136E9	7.467283640947739 -0.009021681805382098	14.604314157318955 5.1991526458857414E13
7.493273763135675 -0.6086367253598413	7.47737458436813 -0.7407787357451427	7.493273763135675 1.635583430654022E10	7.47737458436813 5.166848813291258E9	7.47737458436813 -0.009021376236251322	14.627186539782407 5.048265201799279E13
7.5066606111475975 -0.6114240195209009	7.4893110326477474 -0.740867902395272	7.5066606111475975 1.7907481338817905E10	7.4893110326477474 5.169366290164282E9	7.4893110326477474 -0.009021574939139576	14.650059546293217 4.896543280905154E13
7.520053542070444 -0.6142447990885449	7.501337927699074 -0.7409953479444775	7.520053542070444 1.9653701299295334E10	7.501337927699074 5.178087030279795E9	7.501337927699074 -0.00902244671013186	14.672933785787588 4.7439868832033664E13
7.533455430239559 -0.6170990640627787	7.513458779193686 -0.7411610723927522	7.533455430239559 2.1594494187972504E10	7.513458779193686 5.1930110336377945E9	7.513458779193686 -0.00902399154922795	14.695809867103257 4.5905960086939164E13
7.547348999786243 -0.6200985427861267	7.526345005919141 -0.7414067522707244	7.547348999786243 2.383798172067863E10	7.526345005919141 5.219137049456903E9	7.526345005919141 -0.009026681722334562	14.719192210164646 4.43333296002593E13
7.561239593951251 -0.6231229382824699	7.539160868413702 -0.7417430687892805	7.561239593951251 2.6426089314453217E10	7.539160868413702 5.258999729327191E9	7.539160868413702 -0.009030584317786139	14.742575885538226 4.276355135339506E13
7.575130424132429 -0.626172250551801	7.551937165721797 -0.7421700219484118	7.575130424132429 2.935881696929626E10	7.551937165721797 5.312599073248657E9	7.551937165721797 -0.009035699335582459	14.765961541998202 4.119662534634646E13
7.589024701563969 -0.629246479594129	7.563375853473749 -0.7426726463963869	7.589024701563969 3.2636164685207767E10	7.563375853473749 5.378501608502621E9	7.563375853473749 -0.00904178443430037	14.789349828153918 3.963255157911349E13
7.603448729048786 -0.632449544749325	7.574752568758102 -0.743291899106727	7.603448729048786 3.642424238275459E10	7.574752568758102 5.463596387563441E9	7.574752568758102 -0.00904925814387425	14.813253460142386 3.804222975441292E13
7.617862382241296 -0.6356221056465161	7.586131362201384 -0.744027780079425	7.617862382241296 4.07505722672568E10	7.586131362201384 5.567883410431117E9	7.586131362201384 -0.009058120464303543	14.837159202823228 3.6467895566408234E13
7.6322692439647 -0.638764162285697	7.595737062312499 -0.7447717020153091	7.6322692439647 4.561515433871438E10	7.595737062312499 5.676861852149709E9	7.595737062312499 -0.00906702118784286	14.861067747326583 3.4909549015099434E13
7.646672902110211 -0.6418757146668694	7.605434968793707 -0.745621746738709	7.646672902110211 5.101798859712734E10	7.605434968793707 5.806803034339806E9	7.605434968793707 -0.00907711029148539	14.884979784539647 3.3367190100486523E13
7.6665883308600895 -0.6459802443323293	7.615292609143612 -0.7465779142496212	7.6665883308600895 5.89121289697853E10	7.615292609143612 5.957706957001407E9	7.615292609143612 -0.009088387775231133	14.90941622749098 3.1813694715667438E13
7.686504440260766 -0.6500237525119745	7.624631164950628 -0.7475818133611112	7.686504440260766 6.829653350049365E10	7.624631164950628 6.121904923088626E9	7.624631164950628 -0.009100129376742094	14.933855635855727 3.0289607379357984E13
7.706431159982358 -0.6540062392058106	7.634257438847247 -0.7486927859420591	7.706431159982358 7.91712021892524E10	7.634257438847247 6.313095603251819E9	7.634257438847247 -0.00911301331326575	14.958298745788134 2.879492809155817E13
7.7263784038496475 -0.6579277044138339	7.644238429644665 -0.7499108319924614	7.7263784038496475 9.153613503606154E10	7.644238429644665 6.531278997490986E9	7.644238429644665 -0.009127039584801433	14.982746293108068 2.7329656852268004E13
7.747694252723734 -0.6620990788683967	7.654876251562773 -0.7512793043501302	7.747694252723734 1.062916955756778E11	7.654876251562773 6.7876614087473955E9	7.654876251562773 -0.009142652818962427	15.007526522122278 2.588051700142011E13
7.768986667559392 -0.6662760066797011	7.666087039293172 -0.7527755616126326	7.768986667559392 1.2449117678263823E11	7.666087039293172 7.086856073461369E9	7.666087039293172 -0.00915956012827801	15.03231059494908 2.4471785298322477E13
7.7902677442858765 -0.6704584878477524	7.677939016139322 -0.7543996037799632	7.7902677442858765 1.461345786569428E11	7.677939016139322 7.428862991632903E9	7.677939016139322 -0.009177761512747629	15.057099276847326 2.3103461742975105E13
7.811549598165116 -0.6746465223725435	7.691184346015588 -0.7562449189140326	7.811549598165116 1.7122190119859152E11	7.691184346015588 7.844249193043159E9	7.691184346015588 -0.00919820600540755	15.081893332649104 2.1775546335377992E13
7.832238402283366 -0.6787406240775349	7.7044012735732 -0.7581140623364897	7.832238402283366 1.989208874740029E11	7.7044012735732 8.298038503629982E9	7.7044012735732 -0.009218706606745841	15.105831988477048 2.053633858314096E13
7.852925265381024 -0.6829133593750969	7.717640973616164 -0.760007034047331	7.852925265381024 2.3412024479227945E11	7.717640973616164 8.790230923393373E9	7.717640973616164 -0.00923926331676217	15.129774993885528 1.934041810749898E13
7.873624958259267 -0.6871647282652313	7.7299512827888295 -0.7617672584694466	7.873624958259267 2.7681997315342126E11	7.7299512827888295 9.278924676971449E9	7.7299512827888295 -0.009258182657592373	15.153723036571893 1.8187784908452062E13
7.894352224290764 -0.69149473074794	7.742981522380988 -0.7636474404158529	7.894352224290764 3.270200725574282E11	7.742981522380988 9.84368370907132E9	7.742981522380988 -0.009278190935816832	15.177676803799644 1.7078438986000201E13
7.912352814577852 -0.6953437108172897	7.75675286312163 -0.7656475798865356	7.912352814577852 3.780806408365547E11	7.75675286312163 1.0484508019692986E10	7.75675286312163 -0.00929928815143477	15.200614043309752 1.6058982741654387E13
7.930332602235372 -0.6993162154573307	7.76764976378126 -0.7672917722161765	7.930332602235372 4.4351624504096674E11	7.76764976378126 1.1055236023506145E10	7.76764976378126 -0.0093164908607557	15.223555950877891 1.5080840011153975E13
7.948301247388059 -0.7034122446680664	7.778186516256426 -0.7688952395807318	7.948301247388059 5.233268851706645E11	7.778186516256426 1.1646225544176607E10	7.778186516256426 -0.009333145249375119	15.246503129547685 1.4144010794498957E13
7.96626842813309 -0.7076317984494933	7.788420395331336 -0.7704579819801962	7.96626842813309 6.175125612256478E11	7.788420395331336 1.2257476581704365E10	7.788420395331336 -0.009349251317293139	15.2694561819473 1.3248495091689336E13
7.981573725372215 -0.7114497230014107	7.7992005750625335 -0.7720521709513646	7.981573725372215 7.171248586738165E11	7.7992005750625335 1.292178387671165E10	7.7992005750625335 -0.009365512117973429	15.291434060778498 1.2430076673195707E13
7.996881957970031 -0.7153357532940587	7.8099001505273185 -0.7735833936084804	7.996881957970031 8.414165330437052E11	7.8099001505273185 1.359650614759597E10	7.8099001505273185 -0.009380978643194648	15.313416816607637 1.1648476314116686E13
8.012195894239122 -0.7192898893274338	7.8205514732343815 -0.7750516499515365	8.012195894239122 9.903875843353138E11	7.8205514732343815 1.4281643394357323E10	7.8205514732343815 -0.009395650892956575	15.335404978295749 1.0903694014452277E13
8.02751829940061 -0.7233121311015376	7.832927116881564 -0.7766381704035483	8.02751829940061 1.1640380125486423E12	7.832927116881564 1.506478759128072E10	7.832927116881564 -0.009411280980404002	15.357399074313907 1.0195729774202477E13
8.042936900367103 -0.7273482746356388	7.845442382863652 -0.7781526581579739	8.042936900367103 1.3717203001519849E12	7.845442382863652 1.5852534148851978E10	7.845442382863652 -0.00942599045694359	15.378457807842924 9.55148562305271E12
8.058352827839594 -0.7313147458224334	7.858101536130598 -0.7795951132148078	8.058352827839594 1.6185378212060474E12	7.858101536130598 1.6644883067071098E10	7.858101536130598 -0.009439779322575448	15.399521537822205 8.938467833008557E12
8.073768905901108 -0.7352115446619178	7.8726309306809785 -0.7811105670534131	8.073768905901108 1.9044905757108303E12	7.8726309306809785 1.7516683439192726E10	7.8726309306809785 -0.009453955228762467	15.420590728095505 8.356676404070014E12
8.089187958551925 -0.7390386711540886	7.887543318255153 -0.7825832531844261	8.089187958551925 2.2295785636663335E12	7.887543318255153 1.8405783992634342E10	7.887543318255153 -0.009467451527805815	15.441665842146051 7.806111336237083E12
8.105333222109442 -0.7429043847085532	7.902856396230863 -0.7840131716078274	8.105333222109442 2.622558276201815E12	7.902856396230863 1.9312184727395947E10	7.902856396230863 -0.009480268219705157	15.461843915887737 7.306725362347642E12
8.121469083459113 -0.7466047190714145	7.922263538505539 -0.7857486267313165	8.121469083459113 3.0663920914273125E12	7.922263538505539 2.0466702074918385E10	7.922263538505539 -0.00949544948908898	15.482027032805368 6.832867790505656E12
8.137598777358543 -0.750139674242674	7.941280432634986 -0.7874407290131851	8.137598777358543 3.5610800093428267E12	7.941280432634986 2.166569304413819E10	7.941280432634986 -0.009510024258075456	15.502215599750494 6.384538620711128E12
8.1537255422766 -0.7535092502223337	7.959993813272982 -0.7890894784534259	8.1537255422766 4.1066220299483564E12	7.959993813272982 2.2909157635055363E10	7.959993813272982 -0.009523992526663472	15.52241002324527 5.961737852964056E12
8.171593203962782 -0.7570300809598232	7.980593425914226 -0.790967586560126	8.171593203962782 4.779284172813456E12	7.980593425914226 2.4417982631043175E10	7.980593425914226 -0.009539857965941034	15.54174428765461 5.579151358316131E12
8.189471376510511 -0.760329902348551	8.000893347424741 -0.7928895716698969	8.189471376510511 5.507401635553677E12	8.000893347424741 2.610042692433125E10	8.000893347424741 -0.009556063980993179	15.561083583260578 5.216867246922985E12
8.207368891078357 -0.7634087143885102	8.020935482358652 -0.7948554337827192	8.207368891078357 6.290974418169018E12	8.020935482358652 2.795649051491959E10	8.020935482358652 -0.009572610571819573	15.580428266951166 4.874885518784619E12
8.225294550238106 -0.7662665170797078	8.038953542877884 -0.7967394076836483	8.225294550238106 7.130002520659479E12	8.038953542877884 2.988289135651367E10	8.038953542877884 -0.009588563485093737	15.59977869531625 4.553206173901032E12
8.2411533766909 -0.7686056328403383	8.056645768532881 -0.7986900968069923	8.2411533766909 7.905763332122793E12	8.056645768532881 3.2064867921596676E10	8.056645768532881 -0.009605099030424724	15.618304448500997 4.2626047107640996E12
8.257008171688426 -0.770799615515501	8.074014048967758 -0.8007075011527425	8.257008171688426 8.711347251441231E12	8.074014048967758 3.45024202101686E10	8.074014048967758 -0.009622217207811978	15.636835173931397 3.9878182988511035E12
8.272865076374853 -0.7728484651051994	8.089088539381242 -0.802583437988079	8.272865076374853 9.546754278614795E12	8.089088539381242 3.696750237024428E10	8.089088539381242 -0.009638174399136945	15.65537118468923 3.728846938162044E12
8.28873022944447 -0.7747521816094389	8.1037972703213 -0.804513532078011	8.28873022944447 1.0411984413643486E13	8.1037972703213 3.973519559673487E10	8.1037972703213 -0.009654555583591629	15.673912793588546 3.48569062869692E12
8.301620596436623 -0.7762048437230158	8.118145888725426 -0.806497783422528	8.301620596436623 1.1127185198737148E13	8.118145888725426 4.2805499889640366E10	8.118145888725426 -0.009671360761175807	15.69166392479473 3.2662571775847734E12
8.314501724649553 -0.7775930193905234	8.130689252332347 -0.808348031797288	8.314501724649553 1.1865001093990768E13	8.130689252332347 4.591703088601757E10	8.130689252332347 -0.009686985913414214	15.70941993217841 3.0589559813537793E12
8.327376901058551 -0.7789167086119688	8.14290694703122 -0.8102316263750096	8.327376901058551 1.2625432099404344E13	8.14290694703122 4.936038352462936E10	8.14290694703122 -0.009702798315388117	15.727181090413454 2.8637870400039375E12
8.340249417198258 -0.7801759113873521	8.154825940101423 -0.8121485671556892	8.340249417198258 1.3408478214977877E13	8.154825940101423 5.313555780547571E10	8.154825940101423 -0.00971879796709707	15.744947673934833 2.6807503535352485E12
8.350721406122629 -0.7811654520684703	8.165552163643998 -0.8139610999732385	8.350721406122629 1.4062255222619057E13	8.165552163643998 5.7007372714955086E10	8.165552163643998 -0.00973381438903953	15.76195666282054 2.515662702135552E12
8.361183771446914 -0.7821423580180342	8.1760873982927 -0.8157821102639788	8.361183771446914 1.4752731941818318E13	8.1760873982927 6.121543182703314E10	8.1760873982927 -0.00974876378617573	15.77897040290991 2.3597793269922397E12
8.37163827275115 -0.7831066292360438	8.18648781538042 -0.8176115980279173	8.37163827275115 1.5479908372575662E13	8.18648781538042 6.5759735141709854E10	8.18648781538042 -0.009763646158506223	15.795989135199303 2.213100228105313E12
8.382086673588436 -0.7840582657224973	8.196428737994083 -0.819361744593599	8.382086673588436 1.6243784514891088E13	8.196428737994083 7.046088239948468E10	8.196428737994083 -0.009777706539412123	15.813013100473066 2.0756254054747715E12
8.390346846438126 -0.7848405658127442	8.206193993769674 -0.8210715658476593	8.390346846438126 1.6911356793378287E13	8.206193993769674 7.539205060355951E10	8.206193993769674 -0.009791292913104432	15.829311028888565 1.95165073664856E12
8.39863336783507 -0.7856298847712351	8.215825232512737 -0.8227410617901016	8.39863336783507 1.7627123443323094E13	8.215825232512737 8.05532397539343E10	8.215825232512737 -0.00980440527958315	15.845613561455933 1.8346043922597473E12
8.406973983002318 -0.7864262225979664	8.227034177133858 -0.8246421747988437	8.406973983002318 1.8391084464725504E13	8.227034177133858 8.689653645551215E10	8.227034177133858 -0.009819119602316073	15.86192090963774 1.7244863723083337E12
8.415395902559357 -0.7872295792929362	8.23815524243371 -0.8264837296898859	8.415395902559357 1.9203239857585527E13	8.23815524243371 9.352655496164839E10	8.23815524243371 -0.00983317378048254	15.878233284709287 1.6212966767943188E12
8.423342502520887 -0.7879874002855543	8.249243381665877 -0.8282657264632176	8.423342502520887 2.0015090406302375E13	8.249243381665877 1.0044329527234303E11	8.249243381665877 -0.00984656781408244	15.893849908505468 1.5282238047222212E12
8.431265327499332 -0.7887455147930948	8.261991144930123 -0.8302139751470898	8.431265327499332 2.0874420831420355E13	8.261991144930123 1.0863040646704243E11	8.261991144930123 -0.009860939015287062	15.909470973014821 1.440338176721948E12
8.439188152477778 -0.7895039228155598	8.274759451563034 -0.8320731598370203	8.439188152477778 2.1781231132939465E13	8.274759451563034 1.170481874955643E11	8.274759451563034 -0.009874409971818543	15.925096663797023 1.357639792793499E12
8.447134752439307 -0.7902626243529509	8.28760460670311 -0.8338432805330198	8.447134752439307 2.2735521310859707E13	8.28760460670311 1.2569663835790858E11	8.28760460670311 -0.009886980683676994	15.940727166246983 1.2801286529368745E12
8.455556671996348 -0.7910672892621564	8.300302543290728 -0.835472846596164	8.455556671996348 2.3806634288515168E13	8.300302543290728 1.3423070148447383E11	8.300302543290728 -0.009898300478246913	15.95569098038662 1.2101826428235742E12
8.4638972871636 -0.7918649151814394	8.313054763119064 -0.837008850870725	8.4638972871636 2.4929527866773367E13	8.313054763119064 1.427603275141069E11	8.313054763119064 -0.009908753688319116	15.970659060145934 1.144103209096781E12
8.472183808560546 -0.7926555021108017	8.325892602472813 -0.8384512933566901	8.472183808560546 2.6104202045634305E13	8.325892602472813 1.5128551644680777E11	8.325892602472813 -0.00991834031389327	15.985631568363992 1.0818903517564946E12
8.480443981410238 -0.7934390500502415	8.336704721361103 -0.8395792217543994	8.480443981410238 2.7330656825097984E13	8.336704721361103 1.5827310690001694E11	8.336704721361103 -0.009925661034445032	16.000608667735413 1.0235440708027152E12
8.48834274051539 -0.7941751067194831	8.347525765211095 -0.840640031059551	8.48834274051539 2.8544158304176875E13	8.347525765211095 1.6509367961814688E11	8.347525765211095 -0.009932399559776428	16.014946965774737 9.708443907917162E11
8.496253815349398 -0.794904654869673	8.358366350853608 -0.841633721272145	8.496253815349398 2.9807745877726395E13	8.358366350853608 1.717472346011976E11	8.358366350853608 -0.009938555889887235	16.029289346606998 9.210063154819456E11
8.504187327958798 -0.7956276945008076	8.368763537132216 -0.84251953042022	8.504187327958798 3.1121419545746547E13	8.368763537132216 1.7786045819387045E11	8.368763537132216 -0.009943896106068939	16.043635953140328 8.740298448734031E11
8.512153314858361 -0.7963442256128905	8.37911756170517 -0.8433449662855823	8.512153314858361 3.2485179308237336E13	8.37911756170517 1.836914455388274E11	8.37911756170517 -0.009948736929358715	16.057986928156616 8.299149789660887E11
8.520213601104349 -0.7970573931471625	8.38943381905535 -0.8441100288682319	8.520213601104349 3.3914825276787266E13	8.38943381905535 1.8924019663606845E11	8.38943381905535 -0.009953078359756562	16.071725857099477 7.899989342718778E11
8.528265400705926 -0.7977529859191366	8.400191551467938 -0.8448458085591364	8.528265400705926 3.537268214840707E13	8.400191551467938 1.9467097688076196E11	8.400191551467938 -0.009957092851442306	16.085468681510925 7.521649468041521E11
8.53631930406399 -0.798431003928811	8.410826766009214 -0.8455188960636013	8.53631930406399 3.685874992309675E13	8.410826766009214 1.9968432488855334E11	8.410826766009214 -0.00996060762762363	16.099215526814042 7.164130165629116E11
8.544385893293551 -0.799091447176191	8.421342725130376 -0.8461292913816267	8.544385893293551 3.837302860085629E13	8.421342725130376 2.042802406594426E11	8.421342725130376 -0.009963622688300533	16.11296651832189 6.827431435481565E11
8.553964718889606 -0.7998383644927456	8.43414470609463 -0.8467976442111018	8.553964718889606 4.0185067284059586E13	8.43414470609463 2.0930567410344888E11	8.43414470609463 -0.009966671356611223	16.126252440753056 6.518964689965145E11
8.56349668716032 -0.8005339300225254	8.446605304247926 -0.847380658825732	8.56349668716032 4.1944289164237164E13	8.446605304247926 2.1361162445129068E11	8.446605304247926 -0.009969058228173733	16.13954213767848 6.225394804137664E11
8.57299920169468 -0.8011781437655303	8.458726761088768 -0.8478783352254942	8.57299920169468 4.365069424138902E13	8.458726761088768 2.1719809170296796E11	8.458726761088768 -0.009970783302987507	16.152835722252902 5.94672177799912E11
8.582489828116843 -0.8017710057217604	8.471472126310875 -0.8483286017773279	8.582489828116843 4.5304282515515164E13	8.471472126310875 2.2023649589311078E11	8.471472126310875 -0.009971949272661762	16.166133307531826 5.682945611549514E11
8.593465716745708 -0.8023614950334812	8.483579921691597 -0.848697203197978	8.593465716745708 4.7028254081516305E13	8.483579921691597 2.224747208991325E11	8.483579921691597 -0.009972485908241957	16.17961857430045 5.4281527233514655E11
8.604449338308076 -0.8028977762936931	8.495050280666838 -0.848984139487432	8.604449338308076 4.865457201824348E13	8.495050280666838 2.2391276672103305E11	8.495050280666838 -0.009972393209727315	16.19310785909797 5.184558572094732E11
8.615445925002941 -0.8033798495024014	8.50650465349428 -0.8492095314518844	8.615445925002941 5.018323632569667E13	8.50650465349428 2.2449845871675314E11	8.50650465349428 -0.009971521978547893	16.206601279978198 4.952163157779313E11
8.626460690553348 -0.8038077146596025	8.516932635869045 -0.8493628409600396	8.626460690553348 5.16142470038759E13	8.516932635869045 2.2418766525074243E11	8.516932635869045 -0.00996987207094746	16.22009895488642 4.730966480405208E11
8.639393899622972 -0.8042588690396579	8.52633744239052 -0.8494440680118975	8.639393899622972 5.319973258237177E13	8.52633744239052 2.2298038632300085E11	8.52633744239052 -0.009967443486925798	16.233882401462836 4.514550351324724E11
8.652320788577041 -0.8046552016068818	8.535582320447928 -0.8495199176404755	8.652320788577041 5.466661007996764E13	8.535582320447928 2.2152210130480225E11	8.535582320447928 -0.009964617119719743	16.247670183256492 4.3066117902656964E11
8.66524986277268 -0.804996712361274	8.544814741133823 -0.8496270761130278	8.66524986277268 5.6014879496663516E13	8.544814741133823 2.2062942747125235E11	8.544814741133823 -0.009962356368549807	16.261462426027833 4.1071507972281256E11
8.678189623257904 -0.8052834013028329	8.554064145473435 -0.8497655434295419	8.678189623257904 5.724454083245938E13	8.554064145473435 2.2030236482235114E11	8.554064145473435 -0.009960661233415213	16.275259255415314 3.9161673722120123E11
8.69253772207412 -0.8055456192054864	8.562489551925138 -0.8499020149431269	8.69253772207412 5.84769672246209E13	8.562489551925138 2.2018140418743924E11	8.562489551925138 -0.00995927873380209	16.28934748715176 3.7285612639400195E11
8.706855014300345 -0.8057454558300945	8.570375216030367 -0.8500400265316097	8.706855014300345 5.9550549021224914E13	8.570375216030367 2.2022298982416315E11	8.570375216030367 -0.009958125908906101	16.30344039556372 3.5479810033304474E11
8.721153004765547 -0.8058829111766572	8.57776667761995 -0.8501795781949761	8.721153004765547 6.046528622227143E13	8.57776667761995 2.2042712173252286E11	8.57776667761995 -0.009957202758726913	16.317538114607306 3.374426590383296E11
8.735443244917327 -0.805957985245171	8.585136237282743 -0.8503312498209246	8.735443244917327 6.122117882776044E13	8.585136237282743 2.2083832658634903E11	8.585136237282743 -0.009956503973004516	16.331640778101548 3.2078980250985657E11
8.749135912888862 -0.8059748783372873	8.592420545762412 -0.8504975745824312	8.749135912888862 6.179929690688412E13	8.592420545762412 2.2148255672321478E11	8.592420545762412 -0.00995605012162648	16.346040535123276 3.044552237108986E11
8.76282860839252 -0.8059284964944444	8.599644142010874 -0.8506785524795015	8.76282860839252 6.2207063823443234E13	8.599644142010874 2.223598121431201E11	8.599644142010874 -0.009955841204592808	16.36044533640821 2.8876812356665137E11
8.77652687927058 -0.8058188397166406	8.605993903652106 -0.8508573649802846	8.77652687927058 6.244447957743779E13	8.605993903652106 2.234035456496516E11	8.605993903652106 -0.009955931371783522	16.374855324625646 2.7372850207711493E11
8.79023626659669 -0.8056459080038776	8.612535933030488 -0.8510616905456247	8.79023626659669 6.251154416886777E13	8.612535933030488 2.247398339830304E11	8.612535933030488 -0.00995625713560655	16.389270642290885 2.5933635924228918E11
8.804013737526171 -0.8054072014149485	8.619270936009677 -0.8512915291755148	8.804013737526171 6.239700306647778E13	8.619270936009677 2.263686771432564E11	8.619270936009677 -0.009956818496061448	16.403988801505403 2.4528814077748218E11
8.817779981405058 -0.805082660184854	8.62453810902275 -0.8514891875078137	8.817779981405058 6.206206689738467E13	8.62453810902275 2.2786828546261703E11	8.62453810902275 -0.00995744777164198	16.418712400700656 2.3185454730257413E11
8.831540622226715 -0.8046722843135887	8.630014257433022 -0.8517094345163025	8.831540622226715 6.150673566158844E13	8.630014257433022 2.2961570653609055E11	8.630014257433022 -0.009958244027376106	16.433441591806375 2.1903557881756494E11
8.845301290854424 -0.8041760738011545	8.635700439546476 -0.8519522702009743	8.845301290854424 6.073100935908908E13	8.635700439546476 2.3161094036367688E11	8.635700439546476 -0.009959207263263492	16.44817652657932 2.068312353224547E11
8.856543712825362 -0.8036721231817099	8.640307579547729 -0.8521601244507258	8.856543712825362 5.985922465319857E13	8.640307579547729 2.333731647017438E11	8.640307579547729 -0.009960087574981014	16.463220103872324 1.949810205191236E11
8.867785278393647 -0.8030797539294605	8.645092598886626 -0.8523780209946894	8.867785278393647 5.8786994416471055E13	8.645092598886626 2.3525177523366794E11	8.645092598886626 -0.009961020525234177	16.47826954714452 1.8369783713634045E11
8.879034418559037 -0.80239896604441	8.650057224073253 -0.8526059598328652	8.879034418559037 5.751431864890655E13	8.650057224073253 2.3724677195944922E11	8.650057224073253 -0.009962006114023536	16.49332501816425 1.729816851741052E11
8.890299547314454 -0.8016297595265565	8.654476032608143 -0.8528282775771094	8.890299547314454 5.604119735050503E13	8.654476032608143 2.3926882680111932E11	8.654476032608143 -0.009963065929795234	16.508386678505616 1.6283256463241788E11
8.900419053299089 -0.8008529656528962	8.658652313286739 -0.8530689577000148	8.900419053299089 5.4533164975754234E13	8.658652313286739 2.4154059494715503E11	8.658652313286739 -0.009964309996300935	16.523762831187632 1.5301895277579572E11
8.910525653812597 -0.799993269865614	8.66260794173807 -0.8533280002015724	8.910525653812597 5.288724298696238E13	8.66260794173807 2.4406207639755627E11	8.66260794173807 -0.009965738313540196	16.539145308440148 1.4370721704063724E11
8.920625449794288 -0.7990506721647082	8.666169962397957 -0.8535804685437709	8.920625449794288 5.1103431384129484E13	8.666169962397957 2.4657086975612875E11	8.666169962397957 -0.009967152011766567	16.554534282480404 1.3489735742694244E11
8.930724554515479 -0.7980251725501857	8.669592210908462 -0.8538345139441796	8.930724554515479 4.9181730167255555E13	8.669592210908462 2.491344611185293E11	8.669592210908462 -0.009968579280613121	16.56992992530762 1.2658937393471133E11
8.941920124863517 -0.7967669461963593	8.672898032243346 -0.8540901364027986	8.941920124863517 4.685967411083851E13	8.672898032243346 2.5175285048475793E11	8.672898032243346 -0.009970020120080636	16.5856459548887 1.185811065179928E11
8.953142532684373 -0.7953783464252675	8.675982819202948 -0.8543354640916467	8.953142532684373 4.441986687218116E13	8.675982819202948 2.5429990748609937E11	8.675982819202948 -0.009971393664412576	16.601368802707775 1.1100398006459225E11
8.9644078786995 -0.7938593732369101	8.679010596552217 -0.8545786223119896	8.9644078786995 4.186230845128349E13	8.679010596552217 2.5685270537661887E11	8.679010596552217 -0.009972741758879744	16.617098652074578 1.038579945745097E11
8.975732080483583 -0.7922100266312837	8.682002905957782 -0.8548196110638129	8.975732080483583 3.918699884814552E13	8.682002905957782 2.5941124415631628E11	8.682002905957782 -0.009974064403481586	16.632835686054182 9.714315004774518E10
8.985679709604637 -0.7906377759815983	8.685189826957252 -0.8550713856243108	8.985679709604637 3.6777058189772695E13	8.685189826957252 2.6211174457041962E11	8.685189826957252 -0.009975420352402065	16.648899041439147 9.069054858824118E10
8.995626069469074 -0.7889477739658366	8.688383644061815 -0.8553177188707819	8.995626069469074 3.435541157710575E13	8.688383644061815 2.6477685485394095E11	8.688383644061815 -0.009976720528690697	16.664969746471606 8.460398108196172E10
9.005582271324661 -0.7871400205840038	8.691606715116807 -0.8555586108032225	9.005582271324661 3.192205901014469E13	8.691606715116807 2.674065750068803E11	8.691606715116807 -0.009977964932347372	16.681047996231772 7.888344752890678E10
9.015559393536957 -0.7852145158360964	8.695327379662674 -0.8558203758737646	9.015559393536957 2.947700048888952E13	8.695327379662674 2.7028561487127472E11	8.695327379662674 -0.009979271851210059	16.697133985525376 7.352894792907639E10
9.025341204209429 -0.7831914129892263	8.699126573598418 -0.8560718686144844	9.025341204209429 2.710817264529978E13	8.699126573598418 2.7306577590582068E11	8.699126573598418 -0.009980480716597517	16.71355226166268 6.840415070941876E10
9.035100901191141 -0.7810447818766084	8.703026547126827 -0.8563130890253747	9.035100901191141 2.480799230652331E13	8.703026547126827 2.757470581105181E11	8.703026547126827 -0.009981591528509637	16.729978459453825 6.3588501045327484E10
9.044848912753032 -0.7787746224982373	8.707515656407661 -0.8565641025848771	9.044848912753032 2.2576459472560098E13	8.707515656407661 2.7854189354657776E11	8.707515656407661 -0.009982675058068713	16.746412786462717 5.908199893680255E10
9.054595704673448 -0.7763809348541182	8.712147186959823 -0.8567995940901296	9.054595704673448 2.0413574143410152E13	8.712147186959823 2.811571143639567E11	8.712147186959823 -0.009983616383944516	16.762855449945405 5.488464438384396E10
9.064968984346162 -0.773682885846994	8.71693849398805 -0.8570195635411251	9.064968984346162 1.8245549633779145E13	8.71693849398805 2.8359272056265485E11	8.71693849398805 -0.009984415506136934	16.779636481438537 5.088687892894867E10
9.075292815751606 -0.7708888937892082	8.722408082318557 -0.8572389653332939	9.075292815751606 1.6235301590624285E13	8.722408082318557 2.8599352381992163E11	8.722408082318557 -0.009985100493091648	16.796426050338518 4.7146800862412994E10
9.08557945463015 -0.7679989586807592	8.728053571463754 -0.8574386844028661	9.08557945463015 1.438283001394557E13	8.728053571463754 2.881361236485556E11	8.728053571463754 -0.009985606771961475	16.81322437744581 4.366441018423695E10
9.095841289980465 -0.7650130805216504	8.733886377300646 -0.8576187207498362	9.095841289980465 1.2688134903743004E13	8.733886377300646 2.9002052004855664E11	8.733886377300646 -0.009985934342746305	16.8300316832157 4.043970689442053E10
9.106953503258419 -0.7616898391365732	8.740593148728113 -0.8577935045552723	9.106953503258419 1.1065470446746627E13	8.740593148728113 2.917654400398724E11	8.740593148728113 -0.009986074546232349	16.847183521785222 3.7384076835963776E10
9.118093978487279 -0.7583685787831955	8.747472733497204 -0.8579464242786718	9.118093978487279 9.629399498857377E12	8.747472733497204 2.931910798646926E11	8.747472733497204 -0.009986010329213868	16.864344560619234 3.453819849730575E10
9.12928057529235 -0.7550492994615086	8.754531979559975 -0.8580774799200226	9.12928057529235 8.379922060075256E12	8.754531979559975 2.9429743952301733E11	8.754531979559975 -0.009985741691690975	16.88151503454752 3.1902071878446438E10
9.140530933650993 -0.7517320011715194	8.762735953858396 -0.8582008225948163	9.140530933650993 7.317038130400261E12	8.762735953858396 2.951601347992055E11	8.762735953858396 -0.009985197038905103	16.898695178012964 2.9475696979385857E10
9.151031068421434 -0.7487332795723356	8.77105633236847 -0.8583031279863471	9.151031068421434 6.474726743403538E12	8.77105633236847 2.9567669477300586E11	8.77105633236847 -0.009984438148241792	16.916226024314224 2.718753820986171E10
9.16152654343893 -0.7458481262021772	8.779496519063635 -0.8583843960946007	9.16152654343893 5.74210799234113E12	8.779496519063635 2.9584711944441846E11	8.779496519063635 -0.009983465019701043	16.93376678436259 2.5065333677890766E10
9.172032148662376 -0.7430765410610443	8.788009052899351 -0.8584484957000997	9.172032148662376 5.119181877213036E12	8.788009052899351 2.957060854725499E11	8.788009052899351 -0.009982301802442639	16.951317707847753 2.3109083383473026E10
9.18256263136743 -0.7404185241489367	8.796502260183411 -0.858499762750772	9.18256263136743 4.605948398019255E12	8.796502260183411 2.953148855177713E11	8.796502260183411 -0.009980982089612511	16.968879044025893 2.1318787326608494E10
9.192087783246304 -0.7381449635791268	8.804976699998061 -0.8585381972466122	9.192087783246304 4.199268589105478E12	8.804976699998061 2.946735195800826E11	8.804976699998061 -0.00997950588120966	16.98679724802604 1.9637523543489178E10
9.201587312111597 -0.7359831579391694	8.812266732763566 -0.8585639222144907	9.201587312111597 3.8416495965035234E12	8.812266732763566 2.9394378196012476E11	8.812266732763566 -0.00997811407013749	17.00472613363439 1.8084005762349026E10
9.211072099155205 -0.7339331072290642	8.819439984882463 -0.8585843816079999	9.211072099155205 3.533091420213392E12	8.819439984882463 2.9308406196231464E11	8.819439984882463 -0.009976636256365579	17.02266596626913 1.6658233983188046E10
9.220553076326139 -0.7319948114488133	8.826496484234449 -0.8585995754271272	9.220553076326139 3.2735940602350835E12	8.826496484234449 2.9209435958665216E11	8.826496484234449 -0.009975072439893484	17.040617010862874 1.5360208206006233E10
9.22947398240557 -0.7302734088340648	8.832542869496425 -0.8586097514207749	9.22947398240557 3.0540399799520913E12	8.832542869496425 2.91134558895142E11	8.832542869496425 -0.009973637910516975	17.058931072994653 1.4145707511641918E10
9.238354659908818 -0.7286461553096997	8.838431550410133 -0.8586177635027985	9.238354659908818 2.858592600558553E12	8.838431550410133 2.901041902676739E11	8.838431550410133 -0.00997215133264473	17.077256642970376 1.3027267797737644E10
9.247203944809419 -0.7271130508757215	8.844163099219568 -0.858623611673198	9.247203944809419 2.68725192205447E12	8.844163099219568 2.8900325370424786E11	8.844163099219568 -0.00997061270627686	17.095594002843228 1.2004889064293413E10
9.256030767356858 -0.7256740955321286	8.849171372196716 -0.858627526561146	9.256030767356858 2.5400179444398413E12	8.849171372196716 2.879537613044743E11	8.849171372196716 -0.009969178582033389	17.113943434122714 1.1078571311309223E10
9.263661725964534 -0.7245217526162557	8.854005154825394 -0.8586304794931889	9.263661725964534 2.425669028466095E12	8.854005154825394 2.8686343049108405E11	8.854005154825394 -0.009967708877886117	17.1326620070033 1.0214847865415554E10
9.27129268457221 -0.7234161731251314	8.858666030049227 -0.8586324704693178	9.27129268457221 2.3206441172813574E12	8.858666030049227 2.8573226126407684E11	8.858666030049227 -0.0099662035938346	17.151392976585456 9.42198707517004E9
9.278923643179885 -0.7223573570587574	8.862814243282179 -0.8586336781396477	9.278923643179885 2.2249432108856284E12	8.862814243282179 2.846446437110299E11	8.862814243282179 -0.009964768361295673	17.17013664250136 8.69998894057268E9
9.28655460178756 -0.7213453044171336	8.866781671479083 -0.8586344253228644	9.28655460178756 2.1385663092789075E12	8.866781671479083 2.8353356232504877E11	8.866781671479083 -0.009963306805263805	17.18889330377474 8.048853461623476E9
9.295311715363384 -0.7202252708050052	8.870571673696993 -0.8586347120189624	9.295311715363384 2.0461942358191267E12	8.870571673696993 2.823990171061333E11	8.870571673696993 -0.00996181892573833	17.208025194685494 7.443777309169512E9
9.304068828939208 -0.7191398490793643	8.874007828807743 -0.8586346564282978	9.304068828939208 1.9602006564655964E12	8.874007828807743 2.8128759558560004E11	8.874007828807743 -0.009960361498569603	17.227170438283178 6.889969208137939E9
9.31282594251503 -0.7180890392402075	8.877263210043601 -0.8586343661724234	9.31282594251503 1.880585571218317E12	8.877263210043601 2.801640833600535E11	8.877263210043601 -0.009958882871905939	17.24632935275973 6.38742915852876E9
9.321583056090853 -0.71707284128754	8.880344840875425 -0.8586338412513372	9.321583056090853 1.807348980077288E12	8.880344840875425 2.7902848042949384E11	8.880344840875425 -0.009957383045746782	17.265502255626444 5.936157160341973E9
9.33169784661559 -0.7159324828592064	8.883230441178164 -0.8586331303271981	9.33169784661559 1.728397125889816E12	8.883230441178164 2.7787450810994135E11	8.883230441178164 -0.009955848971390457	17.28507372905665 5.518027874173649E9
9.341812637140327 -0.7148195049843471	8.885942355871201 -0.8586322936002864	9.341812637140327 1.6544002008569185E12	8.885942355871201 2.767168816913615E11	8.885942355871201 -0.009954295448241113	17.30462137603718 5.137154235802884E9
9.351927427665064 -0.7137339076629621	8.888496903322444 -0.8586313310706002	9.351927427665064 1.5853582049785957E12	8.888496903322444 2.7555560117375415E11	8.888496903322444 -0.00995272247629897	17.32414556825705 4.793536245229679E9
9.362042218189801 -0.7126756908950549	8.891118919830763 -0.8586301512072287	9.362042218189801 1.521271138254848E12	8.891118919830763 2.7426477497102335E11	8.891118919830763 -0.00995094882116454	17.343646678746413 4.487173902454035E9
9.372873381019167 -0.7115650095532944	8.89359685704414 -0.8586289094467654	9.372873381019167 1.4566496899993816E12	8.89359685704414 2.729822967144206E11	8.89359685704414 -0.009949158154203386	17.363617194266144 4.2028348348759513E9
9.383704543848532 -0.7104699766420817	8.895978663379575 -0.8586276057892102	9.383704543848532 1.3954406220956477E12	8.895978663379575 2.717081664039459E11	8.895978663379575 -0.009947350475414951	17.383563624874277 3.9443177652909737E9
9.394535706677898 -0.7093905921614203	8.898410522270881 -0.8586261872860446	9.394535706677898 1.3376439345436462E12	8.898410522270881 2.7037349251763904E11	8.898410522270881 -0.009945414071309888	17.403486369575827 3.7116226936991024E9
9.405366869507263 -0.708326856111305	8.900876880937359 -0.8586247684065578	9.405366869507263 1.283259627343377E12	8.900876880937359 2.6904747609757562E11	8.900876880937359 -0.00994344970630423	17.423385828800594 3.504749620100337E9
9.419081195759997 -0.7069940524902831	8.903456626454933 -0.8586233491507427	9.419081195759997 1.2181208735665798E12	8.903456626454933 2.677301171437556E11	8.903456626454933 -0.009941457380397534	17.443763327674215 3.312789793038518E9
9.43279552201273 -0.7056632651517054	8.905809194811273 -0.8586221640982616	9.43279552201273 1.1561951036782134E12	8.905809194811273 2.6661485290073248E11	8.905809194811273 -0.009939730734671692	17.46411652493216 3.138317601315924E9
9.446509848265464 -0.70433449409557	8.908355602945566 -0.8586210493031698	9.446509848265464 1.0974823176782776E12	8.908355602945566 2.6550984574061496E11	8.908355602945566 -0.00993798799256762	17.484445848631733 2.981333044932555E9
9.460224174518197 -0.7030077393218805	8.911130075106206 -0.8586200047654602	9.460224174518197 1.0419825155667726E12	8.911130075106206 2.6441509566340292E11	8.911130075106206 -0.009936229154084986	17.50475172834004 2.8418361238884106E9
9.4738295201178 -0.701682303071478	8.913788957178037 -0.8586191946664945	9.4738295201178 9.891558684059266E11	8.913788957178037 2.6347525111151263E11	8.913788957178037 -0.009934690890820885	17.525544377272663 2.712201307100635E9
9.487434865717402 -0.7003393712951391	8.916679347554895 -0.858618523047693	9.487434865717402 9.383140532726104E11	8.916679347554895 2.625451045781831E11	8.916679347554895 -0.009933144200839128	17.54631255316589 2.5942293360538898E9
9.501040211317004 -0.6989789439928673	8.919813918053476 -0.8586179899090487	9.501040211317004 8.894570701668237E11	8.919813918053476 2.6162465606341415E11	8.919813918053476 -0.009931589084139825	17.56705671493947 2.4879202107481756E9
9.514645556916607 -0.697601021164659	8.923070569363764 -0.8586176764529023	9.514645556916607 8.425849190885667E11	8.923070569363764 2.6076478513489807E11	8.923070569363764 -0.00993011166585378	17.58777732310873 2.393273931183492E9
9.52825337602944 -0.6961985825375843	8.926587252839118 -0.8586176288652352	9.52825337602944 7.973951384454326E11	8.926587252839118 2.5991967132876886E11	8.926587252839118 -0.009928636296835713	17.608993547123145 2.3051725785902267E9
9.541861195142273 -0.6947736327035274	8.93037023342526 -0.8586178471460313	9.541861195142273 7.539413383477888E11	8.93037023342526 2.5908931464502652E11	8.93037023342526 -0.009927162977084958	17.630185175360488 2.224934134259696E9
9.555469014255106 -0.6933261716624886	8.934369882839238 -0.8586184144444085	9.555469014255106 7.122235187956351E11	8.934369882839238 2.582939321625515E11	8.934369882839238 -0.00992572657440749	17.65135269948767 2.152558598191899E9
9.569076833367939 -0.6918561994144712	8.938655183271752 -0.8586194541040806	9.569076833367939 6.722416797889716E11	8.938655183271752 2.5751647009351312E11	8.938655183271752 -0.00992429533974315	17.67249661285311 2.0880459703868358E9
9.584286214793828 -0.6901898808371234	8.943229677947162 -0.8586209661250352	9.584286214793828 6.298320291805863E11	8.943229677947162 2.5675692843791132E11	8.943229677947162 -0.009922869273091273	17.694145133210565 2.0280889014473765E9
9.599495596219716 -0.6885263624338362	8.948139162169255 -0.858623069695537	9.599495596219716 5.901008592199181E11	8.948139162169255 2.560103824610873E11	8.948139162169255 -0.009921432635678129	17.715768986972588 1.9735846595949643E9
9.614704977645605 -0.6868656442046097	8.953366339781274 -0.8586256324227213	9.614704977645605 5.53048169906967E11	8.953366339781274 2.552534840513361E11	8.953366339781274 -0.009919920598158827	17.737368700513773 1.9245332448295991E9
9.629914359071494 -0.6852077261494491	8.958913468160906 -0.8586286543065755	9.629914359071494 5.1867396124173303E11	8.958913468160906 2.544862332086575E11	8.958913468160906 -0.009918333160532589	17.758944801975517 1.880934657151281E9
9.640360469011119 -0.68412725301559	8.96524165810029 -0.8586332288106133	9.640360469011119 4.975069650386626E11	8.96524165810029 2.5375455848632462E11	8.96524165810029 -0.009916774892389624	17.78103442901068 1.840620688290082E9
9.65080613110395 -0.6830497716904	8.971505621059723 -0.8586398800776154	9.65080613110395 4.77289455856804E11	8.971505621059723 2.531621449514655E11	8.971505621059723 -0.009915494270126723	17.803099374113398 1.8041284691028795E9
9.661267134060127 -0.6819752821738811	8.97770569740395 -0.8586486081075746	9.661267134060127 4.580214336961573E11	8.97770569740395 2.5270899260408014E11	8.97770569740395 -0.009914491293743999	17.82514020038506 1.771457999589674E9
9.67175919733411 -0.6809037844660351	8.985273281414058 -0.8586623980038022	9.67175919733411 4.3970289855672235E11	8.985273281414058 2.5227323581803143E11	8.985273281414058 -0.00991347960880129	17.847157472777603 1.7426092797504656E9
9.681952894940768 -0.6798529728278622	8.992742765237729 -0.8586802282865102	9.681952894940768 4.2236955372369385E11	8.992742765237729 2.5194729851888733E11	8.992742765237729 -0.009912647934248509	17.869696992035095 1.716091217203079E9
9.692117269038016 -0.6787798808309189	9.000114469867743 -0.8587020989556935	9.692117269038016 4.0538801054290515E11	9.000114469867743 2.517311807066479E11	9.000114469867743 -0.009911996270084988	17.89221187307203 1.692202567179557E9
9.70226673821545 -0.6776845084752088	9.00931936811876 -0.8587369541116976	9.70226673821545 3.887582690143563E11	9.00931936811876 2.5160336162421335E11	9.00931936811876 -0.009911389119316216	17.914702717780486 1.6709433296798995E9
9.712415784588408 -0.6765668557607283	9.018363691404225 -0.8587817909238309	9.712415784588408 3.724803291380473E11	9.018363691404225 2.516424539505909E11	9.018363691404225 -0.00991099477086832	17.937170129984317 1.6523135047041066E9
9.726137596418972 -0.6749555038783841	9.027247567376259 -0.8588366093920845	9.726137596418972 3.500811982622236E11	9.027247567376259 2.5184845768578043E11	9.027247567376259 -0.009910813224740744	17.960168555889133 1.63526841651509E9
9.739861003813372 -0.6732959520620296	9.038475194121299 -0.8589264043608518	9.739861003813372 3.28440704210224E11	9.038475194121299 2.523823346163669E11	9.038475194121299 -0.009910882888994332	17.98314244901272 1.6199773482195342E9
9.75358692456647 -0.6715882003116702	9.049425917690197 -0.8590419066297192	9.75358692456647 3.075588469820485E11	9.049425917690197 2.5325585497100177E11	9.049425917690197 -0.00991127124753688	18.00609245216115 1.606440299817439E9
9.767316275969081 -0.6698322486273041	9.060099914779892 -0.8591831161986798	9.767316275969081 2.8743562657769727E11	9.060099914779892 2.5446901874968488E11	9.060099914779892 -0.009911978300368163	18.02901921014991 1.594657271308805E9
9.779558939206975 -0.6682478230726305	9.072716797132136 -0.8594014054424237	9.779558939206975 2.70521676956412E11	9.072716797132136 2.5650636145115952E11	9.072716797132136 -0.0099133124325681	18.052485794381376 1.5839093043592572E9
9.791801569216917 -0.6666613241764141	9.084912504653772 -0.8596754933438939	9.791801569216917 2.5454392388365787E11	9.084912504653772 2.5924097178539703E11	9.084912504653772 -0.009915137844662802	18.07592801529771 1.5742977887147052E9
9.80404481733507 -0.6650727519386566	9.096692904358083 -0.8600053799030833	9.80404481733507 2.3950236735943488E11	9.096692904358083 2.626728497523973E11	9.096692904358083 -0.009917454536651715	18.099346558799418 1.5658227243751485E9
9.816289334798961 -0.6634821063593614	9.108453540171906 -0.8604241851599435	9.816289334798961 2.253970073837431E11	9.108453540171906 2.67172569011306E11	9.108453540171906 -0.009920465717002558	18.122742112869492 1.5584841113405874E9
9.828647547373446 -0.6618917910488422	9.119795786952572 -0.8609217272554934	9.828647547373446 2.1220826934213474E11	9.119795786952572 2.7273328964353247E11	9.119795786952572 -0.00992404684453585	18.146686387317747 1.5518019591051114E9
9.841004386945672 -0.6603312791413609	9.130746875720506 -0.8614980061897315	9.841004386945672 1.9996419178032913E11	9.130746875720506 2.793550116490766E11	9.130746875720506 -0.009928197919251147	18.170606533723788 1.5458397484286535E9
9.853360523035896 -0.6588005706369229	9.140330557740661 -0.8621048071767499	9.853360523035896 1.8866477469832623E11	9.140330557740661 2.8653728430359674E11	9.140330557740661 -0.0099325354561145	18.194503283321573 1.5405974793112137E9
9.865716625278733 -0.6572996655355245	9.149688788023798 -0.8627910519935638	9.865716625278733 1.783100180961261E11	9.149688788023798 2.9497689896460474E11	9.149688788023798 -0.009937377068549247	18.218377369494902 1.536075151752792E9
9.878707406412197 -0.6557673334341283	9.158870454314279 -0.8635567406401661	9.878707406412197 1.6836809373388593E11	9.158870454314279 3.046738556321005E11	9.158870454314279 -0.009942722756555056	18.24271935513999 1.531973214129775E9
9.891695115952228 -0.6542869684349073	9.166876975033968 -0.8643143611291597	9.891695115952228 1.592461906565563E11	9.166876975033968 3.146056746640131E11	9.166876975033968 -0.009947934376375978	18.267037690111042 1.5283179879518685E9
9.904680531014456 -0.6528585705378562	9.17488196959745 -0.8651437084971443	9.904680531014456 1.509443088641372E11	9.17488196959745 3.259429371907693E11	9.17488196959745 -0.009953554461081371	18.291333144729123 1.5251094732190719E9
9.917664429126505 -0.6514821397429786	9.182939095705965 -0.8660447827441233	9.917664429126505 1.434624483566286E11	9.182939095705965 3.3868564321236896E11	9.182939095705965 -0.009959583010671569	18.315606491493632 1.522347669931385E9
9.931299322030462 -0.6501011947321613	9.190293556062436 -0.866928795361372	9.931299322030462 1.3633666891722101E11	9.190293556062436 3.516899529512282E11	9.190293556062436 -0.009965404019699697	18.338803962283027 1.5199825621461713E9
9.944936546103461 -0.6487709890487645	9.197828728603564 -0.8678814881313626	9.944936546103461 1.297874641463548E11	9.197828728603564 3.6636983990135876E11	9.197828728603564 -0.009971582762841269	18.361981123927084 1.5178632225198295E9
9.958578933410378 -0.6474915226927829	9.205588570522465 -0.8689028610540861	9.958578933410378 1.2381483404402997E11	9.205588570522465 3.827253040627603E11	9.205588570522465 -0.009978119240096062	18.38513864447545 1.5159896510523593E9
9.972229312802414 -0.6462627956642235	9.212223407502991 -0.8698064726596462	9.972229312802414 1.1841877861024655E11	9.212223407502991 3.978436510616069E11	9.212223407502991 -0.009983813173796374	18.40827719367899 1.514361847743761E9
9.984952287287976 -0.64515526438952	9.219101743815571 -0.8707640963173047	9.984952287287976 1.137422833945402E11	9.219101743815571 4.146044663707468E11	9.219101743815571 -0.009989763827414566	18.42986057705943 1.5129873394337199E9
9.997672697148829 -0.6440813921093627	9.226245663857902 -0.8717757320270527	9.997672697148829 1.0938147484037552E11	9.226245663857902 4.330077499901802E11	9.226245663857902 -0.009995971200950082	18.451427328049675 1.5117449764373245E9
10.010392837984654 -0.6430411788237533	9.2317464922021 -0.8725648905891257	10.010392837984654 1.0533635294775244E11	9.2317464922021 4.479846616495988E11	9.2317464922021 -0.01000075073521256	18.47297798537072 1.5106347587545753E9
10.023115005540763 -0.6420346245326938	9.237431628111414 -0.8733880635747377	10.023115005540763 1.0160691771667102E11	9.237431628111414 4.6420778023611505E11	9.237431628111414 -0.010005680363887715	18.49451308895134 1.5096566863854718E9
10.035273280426365 -0.641099393798334	9.243308454890256 -0.8742452509838801	10.035273280426365 9.825567598778845E10	9.243308454890256 4.816771057497286E11	9.243308454890256 -0.010010760086975656	18.51459509327642 1.508823757701082E9
10.047425213897188 -0.640196364609376	9.247880649925111 -0.8749162516311051	10.047425213897188 9.512668987614166E10	9.247880649925111 4.958525419897774E11	9.247880649925111 -0.01001469522634113	18.53466344834238 1.508064151330288E9
10.059572805281327 -0.6393255369658215	9.252577222258271 -0.8756093906663951	10.059572805281327 9.221995938173062E10	9.252577222258271 5.109650086929604E11	9.252577222258271 -0.010018723176693056	18.554718588262737 1.5073778672730901E9
10.071718056051232 -0.6384869108676634	9.25740078715935 -0.8763246680897536	10.071718056051232 8.953548450455534E10	9.25740078715935 5.2701450585927765E11	9.25740078715935 -0.010022843938031878	18.574760948009725 1.5067649055294883E9
10.080773836703317 -0.6379013952730714	9.261198552732392 -0.8768906213856846	10.080773836703317 8.771080955241943E10	9.261198552732392 5.4009897585027765E11	9.261198552732392 -0.01002607710934722	18.593446339350876 1.5062389880708838E9
10.089829617355402 -0.6373257741876559	9.265077802092222 -0.8774721231044778	10.089829617355402 8.595744150047893E10	9.265077802092222 5.539039810550642E11	9.265077802092222 -0.01002937441783569	18.612120505729578 1.5057551894523733E9
10.098902595998762 -0.6367600476114221	9.269039544002904 -0.8780691732461223	10.098902595998762 8.427538034873386E10	9.269039544002904 5.684295214736373E11	9.269039544002904 -0.010032735863497066	18.630783796770586 1.5053135096739564E9
10.108009873196213 -0.6362042155443666	9.272190353689789 -0.8785471654088957	10.108009873196213 8.266462609718419E10	9.272190353689789 5.803510188932477E11	9.272190353689789 -0.010035408724207384	18.649436562710193 1.5049139487356334E9
10.117117150393664 -0.6356506112057678	9.275394322565452 -0.8790377605814799	10.117117150393664 8.108272572957109E10	9.275394322565452 5.928665060352744E11	9.275394322565452 -0.010038135523227965	18.666822734005674 1.5045687448124185E9
10.126190129037022 -0.6350934768980308	9.278651870598898 -0.8795409587638803	10.126190129037022 7.952134625072063E10	9.278651870598898 6.059759828997175E11	9.278651870598898 -0.01004091626055914	18.684199654077403 1.5042486318125029E9
10.135245909689107 -0.6345328126211589	9.28131375699141 -0.8799589876196476	10.135245909689107 7.79804876606328E10	9.28131375699141 6.170965505131361E11	9.28131375699141 -0.010043213745673851	18.701567604388096 1.503953609735886E9
10.144301690341193 -0.6339686183751523	9.284011808381438 -0.8803987696145255	10.144301690341193 7.646014995930762E10	9.284011808381438 6.290445978217856E11	9.284011808381438 -0.010045620201161287	18.71892686683677 1.5036836785825684E9
10.15849065917299 -0.6330573675236097	9.286746221483535 -0.8808603047485191	10.15849065917299 7.404121749017323E10	9.286746221483535 6.418201248256659E11	9.286746221483535 -0.010048135627021781	18.73510434651696 1.5034490033822591E9
10.172648694084254 -0.63210691182561	9.289509038913092 -0.8813242649076249	10.172648694084254 7.159987009514963E10	9.289509038913092 6.549500954565088E11	9.289509038913092 -0.010050647919631506	18.75127418507408 1.5032298424010746E9
10.186806728995517 -0.6311172512811511	9.292271697398618 -0.8817694149437179	10.186806728995517 6.91361077742368E10	9.292271697398618 6.677942030034606E11	9.292271697398618 -0.010053042092852182	18.767436609027875 1.503026195639015E9
10.200995697827315 -0.6300883858902369	9.295034399191238 -0.8821957548567942	10.200995697827315 6.6649930527434746E10	9.295034399191238 6.803524474665211E11	9.295034399191238 -0.010055318146683478	18.783591845209976 1.5028380630960803E9
10.216868948080249 -0.6288393272385475	9.29799752103304 -0.8826414610031827	10.216868948080249 6.373091883800155E10	9.29799752103304 6.936718638995448E11	9.29799752103304 -0.010057682789374467	18.798644855337283 1.5026736049825604E9
10.232742409498249 -0.6275322938625214	9.301359498076597 -0.8831383333115612	10.232742409498249 6.082134966336086E10	9.301359498076597 7.089086947702902E11	9.301359498076597 -0.010060297977710575	18.813691540487113 1.5025190941787522E9
10.248617323172748 -0.6261672857621603	9.30512038294094 -0.8836863717819083	10.248617323172748 5.7921223003512695E10	9.30512038294094 7.260629400787573E11	9.30512038294094 -0.010063163711691359	18.82873208292304 1.502374530684656E9
10.26449492985463 -0.624744302937466	9.308922013625418 -0.884233550637906	10.26449492985463 5.5030538858457054E10	9.308922013625418 7.435961015557205E11	9.308922013625418 -0.010066002198330981	18.84376666513204 1.5022399145002713E9
10.283074463950214 -0.6230220767407841	9.313024532827392 -0.8848176126292602	10.283074463950214 5.17454118857428E10	9.313024532827392 7.628515202758958E11	9.313024532827392 -0.010069005324849334	18.857773512049775 1.502121679624176E9
10.301650310702225 -0.6212746052308615	9.317427999881208 -0.8854385577559567	10.301650310702225 4.861392003592548E10	9.317427999881208 7.838291962392831E11	9.317427999881208 -0.010072173091246084	18.871775112171143 1.5020100340097446E9
10.320224458076288 -0.6195018884076928	9.32216468559511 -0.8861011971073713	10.320224458076288 4.563606330900513E10	9.32216468559511 8.06839146526878E11	9.32216468559511 -0.010075522669193537	18.88577161212916 1.5019049776569774E9
10.338798894583665 -0.6177039262712833	9.327170909955987 -0.8867964249652802	10.338798894583665 4.281184170498171E10	9.327170909955987 8.318074219010426E11	9.327170909955987 -0.010079000785459757	18.899763158717196 1.5018065105658739E9
10.356078410790175 -0.6160687201207056	9.332446759503005 -0.8875242413296762	10.356078410790175 4.040796118653857E10	9.332446759503005 8.587340223617766E11	9.332446759503005 -0.010082607440044744	18.912796657599674 1.501719670303867E9
10.373355314963927 -0.6144283127434678	9.338297727347154 -0.8883272228858692	10.373355314963927 3.813273090769156E10	9.338297727347154 8.894251121908301E11	9.338297727347154 -0.010086543168627782	18.925825794872598 1.5016373167623084E9
10.39064774053511 -0.6127827041395664	9.344406663654418 -0.8891616251074774	10.39064774053511 3.5986150868440704E10	9.344406663654418 9.226334881497834E11	9.344406663654418 -0.010090582553414329	18.938850688493222 1.5015594499411974E9
10.407973772199886 -0.6111318943089996	9.350773712517823 -0.8900274479944921	10.407973772199886 3.396822106878598E10	9.350773712517823 9.583591502386362E11	9.350773712517823 -0.010094725594404164	18.951871456534136 1.5014860698405342E9
10.422800205168777 -0.609708247609059	9.357977071927767 -0.8910042109332688	10.422800205168777 3.2312464923816223E10	9.357977071927767 1.000269072129435E12	9.357977071927767 -0.010099337467424196	18.963999328041744 1.5014211185767634E9
10.437602016286629 -0.6082322099576833	9.365431614116314 -0.8920125375340051	10.437602016286629 3.0690761457700645E10	9.365431614116314 1.0457094899517463E12	9.365431614116314 -0.010104027176470853	18.976123566290397 1.5013592932522728E9
10.452390544333605 -0.6067037813548692	9.373137604382856 -0.8930524277967029	10.452390544333605 2.9103110670439247E10	9.373137604382856 1.0946804037055696E12	9.373137604382856 -0.010108794721544023	18.988244266164926 1.5013005938670628E9
10.467177158647363 -0.6051229618006202	9.381996153319756 -0.8942472371461756	10.467177158647363 2.754951256203203E10	9.381996153319756 1.1536757752031462E12	9.381996153319756 -0.010114182502633406	19.000361522633295 1.5012450204211333E9
10.479970946240295 -0.6035990283273831	9.391092656649393 -0.8954739974621253	10.479970946240295 2.6126426123797997E10	9.391092656649393 1.2179977965790503E12	9.391092656649393 -0.010119612103983489	19.011646757104177 1.5011956701638734E9
10.492760659254806 -0.601978503340816	9.400427653263481 -0.8967327087445414	10.492760659254806 2.4708530868540356E10	9.400427653263481 1.287646467833281E12	9.400427653263481 -0.010125083525594158	19.02292895894709 1.501148540414317E9
10.50557183918345 -0.600261386840919	9.411325791179399 -0.8982053573453834	10.50557183918345 2.329582679625911E10	9.411325791179399 1.374004538500573E12	9.411325791179399 -0.010131351892747054	19.03420820448627 1.5011036311724641E9
10.51842989959257 -0.5984476788276902	9.422425801205112 -0.899709161640442	10.51842989959257 2.1888313906954258E10	9.422425801205112 1.4689588384498667E12	9.422425801205112 -0.010137603211271884	19.045484570105977 1.501060942438315E9
10.529230829839008 -0.5968334035164924	9.433728911377031 -0.9012441216297029	10.529230829839008 2.0713229461659874E10	9.433728911377031 1.5725093676811616E12	9.433728911377031 -0.01014383748116765	19.055985763188502 1.5010229225983589E9
10.539998644142072 -0.5951131025031797	9.447163462365827 -0.9030789669610639	10.539998644142072 1.954353523652413E10	9.447163462365827 1.7056209028396736E12	9.447163462365827 -0.01015108825693245	19.066484420040627 1.5009865070449426E9
10.550748423387127 -0.5932867757877558	9.46070749093289 -0.9049400994445902	10.550748423387127 1.8379231231547035E10	9.46070749093289 1.8535399962762913E12	9.46070749093289 -0.010158217100230682	19.076980602057308 1.5009516957780664E9
10.561495324384383 -0.5913544233702206	9.4743642639774 -0.9068275190802604	10.561495324384383 1.722031744672858E10	9.4743642639774 2.0162666479910134E12	9.4743642639774 -0.010165224011061458	19.08747437067694 1.50091848879773E9
10.568403176343557 -0.5900016614542904	9.489745319943099 -0.9089755998960305	10.568403176343557 1.6461314981706995E10	9.489745319943099 2.218931909678611E12	9.489745319943099 -0.010172915019101558	19.09724603347917 1.5008888348404834E9
10.57531903784488 -0.5885682072840455	9.505032470772184 -0.9111321495913574	10.57531903784488 1.5701022759123848E10	9.505032470772184 2.444768071038432E12	9.505032470772184 -0.010180333020565202	19.10701557119488 1.5008603571590192E9
10.582254572803938 -0.5870540608594856	9.52023418016047 -0.913297168166225	10.582254572803938 1.4939440778979143E10	9.52023418016047 2.6937751320704775E12	9.52023418016047 -0.010187478015451945	19.116783033211437 1.5008330557533371E9
10.589221346323892 -0.5854592221806127	9.534847646541573 -0.9154095785889984	10.589221346323892 1.4176569041272879E10	9.534847646541573 2.9620975877821753E12	9.534847646541573 -0.010194144977558106	19.12654846894771 1.5008069306234372E9
10.595323482317811 -0.5839810863293105	9.549163313578582 -0.9175049691663224	10.595323482317811 1.3511552605612164E10	9.549163313578582 3.256008927810382E12	9.549163313578582 -0.010200460574542047	19.135641312788643 1.500783543685801E9
10.601415998017208 -0.582427850930995	9.563196531496512 -0.9195833398981756	10.601415998017208 1.2853898629213535E10	9.563196531496512 3.5755091521550977E12	9.563196531496512 -0.010206424806403325	19.144732372802462 1.5007610295363166E9
10.607506790471392 -0.5807995159856736	9.575279206641936 -0.9214035413287052	10.607506790471392 1.2203607112076994E10	9.575279206641936 3.8822415337266504E12	9.575279206641936 -0.010211388973561886	19.153821688719127 1.500739388174984E9
10.613603763425733 -0.5790960814933372	9.587008659156472 -0.923191451515085	10.613603763425733 1.1560678054202538E10	9.587008659156472 4.209513145493803E12	9.587008659156472 -0.010216029890395606	19.162909300291467 1.500718619601803E9
10.619232409323397 -0.577437214904017	9.598405805459398 -0.9249470704573026	10.619232409323397 1.0973599091231934E10	9.598405805459398 4.557323987456556E12	9.598405805459398 -0.010220347556904041	19.171370508480017 1.5006999841556416E9
10.624840619317279 -0.5756994243970288	9.60834728539795 -0.92650210849781	10.624840619317279 1.039881102273356E10	9.60834728539795 4.890210640829135E12	9.60834728539795 -0.010223959116075543	19.179830216684802 1.5006820012676318E9
10.630434509851051 -0.5738827099723762	9.617954870170468 -0.928016449443942	10.630434509851051 9.836313848707417E9	9.617954870170468 5.237406924590355E12	9.617954870170468 -0.010227285401200548	19.18828845686858 1.5006646709377735E9
10.636020244408503 -0.5719870716300575	9.627257890911821 -0.9294900932956827	10.636020244408503 9.286107569153505E9	9.627257890911821 5.598912838740214E12	9.627257890911821 -0.01023032641227839	19.196745261010747 1.5006479931660666E9
10.642101721374782 -0.569805492065659	9.635380405939555 -0.9307882864726009	10.642101721374782 8.698512247302269E9	9.635380405939555 5.938283560023436E12	9.635380405939555 -0.01023282693855676	19.204618742715006 1.5006329924444509E9
10.64819179018144 -0.5674966331335556	9.643248045608486 -0.9320421651594044	10.64819179018144 8.129705459751196E9	9.643248045608486 6.284700061396963E12	9.643248045608486 -0.010235087593024828	19.212490960999393 1.5006184803765683E9
10.654299218736119 -0.5650604948337454	9.650899829135016 -0.933251729356102	10.654299218736119 7.579687206500282E9	9.650899829135016 6.638162342860794E12	9.650899829135016 -0.010237108375682702	19.22036194157965 1.5006044569624195E9
10.660432700498834 -0.5624970771662321	9.657485043207847 -0.9342846686262538	10.660432700498834 7.04845748754953E9	9.657485043207847 6.955365839847017E12	9.657485043207847 -0.010238690035205722	19.228231710183653 1.5005909222020042E9
10.66649375295383 -0.5598209294112904	9.663939957529964 -0.9352751391206189	10.66649375295383 6.54776429368169E9	9.663939957529964 7.272563436428397E12	9.663939957529964 -0.010240089051446022	19.235558314678382 1.500578715997142E9
10.672546177577528 -0.5570230244604266	9.670307385864565 -0.9362231408391972	10.672546177577528 6.074669763653025E9	9.670307385864565 7.589755132604933E12	9.670307385864565 -0.010241305424403713	19.242883853303283 1.5005668740044653E9
10.678598506992815 -0.5541033623136338	9.675941214958547 -0.9370290605509366	10.678598506992815 5.629173897463533E9	9.675941214958547 7.869619372446105E12	9.675941214958547 -0.0102422268836444	19.250208346749485 1.5005553962239742E9
10.684659274224693 -0.5510619429709172	9.681566864174751 -0.9377899574000521	10.684659274224693 5.211276695113217E9	9.681566864174751 8.141846324770441E12	9.681566864174751 -0.010243012411340624	19.257531815716984 1.5005442826556683E9
10.690724723680912 -0.5478931613791351	9.687224499213334 -0.9385058313865278	10.690724723680912 4.82682350152347E9	9.687224499213334 8.406435989577938E12	9.687224499213334 -0.010243662007491827	19.26434954710014 1.5005342295611207E9
10.696764691599114 -0.5446611956137621	9.693320174123235 -0.9391929469470837	10.696764691599114 4.474403268587419E9	9.693320174123235 8.667592102806353E12	9.693320174123235 -0.010244194054740863	19.27116637789969 1.5005244454600422E9
10.702787586666751 -0.5413660456748071	9.699285328775682 -0.9398254856687229	10.702787586666751 4.154015996305062E9	9.699285328775682 8.913364669575695E12	9.699285328775682 -0.01024461066100013	19.27798232476511 1.5005149303524332E9
10.708801889181137 -0.5380077115622681	9.705122477793573 -0.9404034475514456	10.708801889181137 3.8656616846764E9	9.705122477793573 9.143753689885967E12	9.705122477793573 -0.010244911826268965	19.284797404352357 1.5005056842382934E9
10.715893673188518 -0.5340452077731639	9.71253876054347 -0.9410915773034256	10.715893673188518 3.5708114822846494E9	9.71253876054347 9.42483952986275E12	9.71253876054347 -0.010245162659015872	19.29118953706912 1.5004972301559002E9
10.722986149478647 -0.5300747696171113	9.719757777304501 -0.9417221769363779	10.722986149478647 3.3091563373209023E9	9.719757777304501 9.687462852733963E12	9.719757777304501 -0.010245290637241888	19.297580896156173 1.5004889757843597E9
10.730084129051317 -0.5260963970941122	9.726785675979189 -0.9422952464502936	10.730084129051317 3.0806962497851596E9	9.726785675979189 9.931623658499605E12	9.726785675979189 -0.01024529576094646	19.303971495317505 1.5004809211236715E9
10.737192411732197 -0.5221100902041611	9.735868939145462 -0.9429806766996949	10.737192411732197 2.88543121967742E9	9.735868939145462 1.0229877640857195E13	9.735868939145462 -0.010245140040205936	19.310361348261996 1.500473066173836E9
10.74532494463796 -0.5175899487769291	9.744659304905957 -0.9435953403735278	10.74532494463796 2.695501887007744E9	9.744659304905957 1.0501001421727969E13	9.744659304905957 -0.010244847779439237	19.316674065884545 1.5004654816068876E9
10.753443996585517 -0.5131471483151282	9.753172938801173 -0.944139237471787	10.753443996585517 2.5312161199107413E9	9.753172938801173 1.074499500111192E13	9.753172938801173 -0.010244418978646253	19.322986045005553 1.5004580602351422E9
10.761556752594728 -0.508781688818762	9.76426656847717 -0.9447734863142179	10.761556752594728 2.392573918386412E9	9.76426656847717 1.1032434609014654E13	9.76426656847717 -0.010243660950974176	19.329297298807045 1.5004508020586E9
10.769670414411499 -0.5044935702878286	9.774965576854425 -0.9453207895303484	10.769670414411499 2.2795752824347568E9	9.774965576854425 1.128056711186982E13	9.774965576854425 -0.01024276668257762	19.335607840475586 1.500443707077261E9
10.777648180678693 -0.5003960106169432	9.785312726495361 -0.9457811471201625	10.777648180678693 2.183983222426952E9	9.785312726495361 1.1489392509677416E13	9.785312726495361 -0.010241736173455696	19.34190338988324 1.500436774294643E9
10.785626521756678 -0.4963838579679587	9.797798631876384 -0.9462504460563279	10.785626521756678 2.1006244117140348E9	9.797798631876384 1.1698459291811176E13	9.797798631876384 -0.010240330026108024	19.348198220291767 1.500429977285767E9
10.793609807283314 -0.49245711234087697	9.809928778966594 -0.9466398988157207	10.793609807283314 2.0294988502960052E9	9.809928778966594 1.1867431373327248E13	9.809928778966594 -0.010238859423812974	19.35449234475834 1.500423316050633E9
10.801602398786908 -0.4886157737357033	9.821781398847468 -0.9469495053983303	10.801602398786908 1.9706065381728635E9	9.821781398847468 1.199630875422563E13	9.821781398847468 -0.010237324366570322	19.360785776344525 1.5004167905892406E9
10.810647535789375 -0.4843677789812597	9.835539098348583 -0.9472317559850163	10.810647535789375 1.9126265122395315E9	9.835539098348583 1.2104939544321799E13	9.835539098348583 -0.01023551820867541	19.367064204719988 1.5004104019087727E9
10.819680757838343 -0.4802038444369261	9.849121544623598 -0.9474575437133348	10.819680757838343 1.8620433090090919E9	9.849121544623598 1.2184792980382604E13	9.849121544623598 -0.010233768442181823	19.373341933169435 1.500404127455309E9
10.828708384516553 -0.47612397010270247	9.862622702260678 -0.9476268685832787	10.828708384516553 1.8188569284815445E9	9.862622702260678 1.2235869062408045E13	9.862622702260678 -0.010232075067089341	19.379618974626148 1.5003979672288492E9
10.837736747156523 -0.4721281559785888	9.878359416698764 -0.9477717056318697	10.837736747156523 1.7830673706568897E9	9.878359416698764 1.2269821533934238E13	9.878359416698764 -0.010230279367778206	19.385895342027652 1.5003919212293935E9
10.847444359245477 -0.46789845389442153	9.894079185833327 -0.9478842296611871	10.847444359245477 1.7492985808171244E9	9.894079185833327 1.2289453301065604E13	9.894079185833327 -0.010228675139689614	19.39215669598907 1.5003859931602654E9
10.857153010614816 -0.46373657163668813	9.90985749791099 -0.9479644406712238	10.857153010614816 1.7196485466461334E9	9.90985749791099 1.2294764363802133E13	9.90985749791099 -0.010227262382823121	19.398417368675542 1.500380163720495E9
10.86687274154039 -0.45964250920539573	9.925219418262975 -0.9480219596063053	10.86687274154039 1.6941172681439164E9	9.925219418262975 1.229285902845222E13	9.925219418262975 -0.010226140255427008	19.40467737289743 1.5003744329100819E9
10.876613558037597 -0.4556162666005408	9.940520049695277 -0.9480672974612299	10.876613558037597 1.6727047453104734E9	9.940520049695277 1.2287533975253814E13	9.940520049695277 -0.010225229916322687	19.410936721469206 1.5003688007290263E9
10.887364675332178 -0.45127077633694146	9.955782337282773 -0.9481004542359885	10.887364675332178 1.6523639174218493E9	9.955782337282773 1.227878920420691E13	9.955782337282773 -0.010224531365509715	19.41718104711127 1.50036327329832E9
10.898090117092913 -0.44706269480715566	9.968525872498427 -0.9481221930545471	10.898090117092913 1.634588805332425E9	9.968525872498427 1.2270662580262135E13	9.968525872498427 -0.01022412667422512	19.42342470971466 1.500357834122249E9
10.908803330822646 -0.4429920220111834	9.98109355702186 -0.9481400801641344	10.908803330822646 1.6193794090422015E9	9.98109355702186 1.2262115192856158E13	9.98109355702186 -0.010223860920031136	19.429667721967796 1.5003524832008128E9
10.919517810065704 -0.4390587579490264	9.993487477105521 -0.9481541155647539	10.919517810065704 1.6067357285511782E9	9.993487477105521 1.225314704198897E13	9.993487477105521 -0.010223734102927318	19.435910096563067 1.5003472205340118E9
10.941493835666297 -0.43192001740772223	10.004048228983454 -0.9481640359838215	10.941493835666297 1.5877494377363865E9	10.004048228983454 1.224528712235638E13	10.004048228983454 -0.010223740381083313	19.44213743949663 1.5003420539937344E9
10.963383195179748 -0.4248978018795624	10.014366081624221 -0.9481724444258779	10.963383195179748 1.57193899234919E9	10.014366081624221 1.2237116939065693E13	10.014366081624221 -0.010223830878817952	19.44836413722018 1.5003369692795737E9
10.9852725546932 -0.4179921113645486	10.024441209687046 -0.9481793408909267	10.9852725546932 1.5593043923895884E9	10.024441209687046 1.2228636492116908E13	10.024441209687046 -0.010224005596131125	19.454590202301194 1.50033196639153E9
11.007248580293792 -0.4112029458626738	10.033178372462755 -0.948184511944496	11.007248580293792 1.5498456378575819E9	10.033178372462755 1.2220628506376988E13	10.033178372462755 -0.010224230668531953	19.460815647310973 1.5003270453296032E9
11.023291093698015 -0.4060278366566168	10.041647590213644 -0.948188980399725	11.023291093698015 1.5432835659557576E9	10.041647590213644 1.2211872064332371E13	10.041647590213644 -0.010224499210688243	19.46702605270121 1.5003222150407255E9
11.039349200359345 -0.40064159285918155	10.049851858744855 -0.9481927462566118	11.039349200359345 1.5374505668215322E9	10.049851858744855 1.2202367165983049E13	10.049851858744855 -0.010224811222599883	19.473235830309658 1.5003174628071692E9
11.055445949007169 -0.39504421447036986	10.057064477292865 -0.9481956887931355	11.055445949007169 1.5323466404549062E9	10.057064477292865 1.2192676145961643E13	10.057064477292865 -0.010225128798347027	19.479444992583833 1.5003127886289346E9
11.071604223010857 -0.38923570149017817	10.064014906373894 -0.9481982597048733	11.071604223010857 1.5279717868558793E9	10.064014906373894 1.2181702369065516E13	10.064014906373894 -0.010225457796044335	19.485653551974952 1.5003081925060215E9
11.085596841586927 -0.38399355069253804	10.070711579090977 -0.9482004589918303	11.085596841586927 1.5244482233678963E9	10.070711579090977 1.2169445835294666E13	10.070711579090977 -0.010225798215692028	19.49184706457809 1.50030368381044E9
11.099571071918623 -0.3784708832385961	10.076639055728078 -0.9482022126334853	11.099571071918623 1.5212587279549894E9	10.076639055728078 1.2156455498488908E13	10.076639055728078 -0.010226114166417832	19.49803996643433 1.5002992509276898E9
11.113541978592082 -0.3726676991283506	10.08234125246503 -0.9482037519307616	11.113541978592082 1.5184033006171591E9	10.08234125246503 1.2141714937728314E13	10.08234125246503 -0.010226415090230145	19.504232269872237 1.5002948938577712E9
11.127524636935936 -0.3665839983618069	10.087834824882458 -0.948205076883645	11.127524636935936 1.5158819413544047E9	10.087834824882458 1.2125224153012879E13	10.087834824882458 -0.010226700987128967	19.510423987223948 1.5002906126006837E9
11.140582761113055 -0.3605844478958664	10.092661453539066 -0.9482061231890713	11.140582761113055 1.5137396269742138E9	10.092661453539066 1.210796963308034E13	10.092661453539066 -0.010226938083878978	19.516600651422586 1.5002864163766394E9
11.153600628669825 -0.35418237650954776	10.097338156532171 -0.9482070442074884	11.153600628669825 1.5117947416460814E9	10.097338156532171 1.2088682624873992E13	10.097338156532171 -0.010227141082956082	19.52277672152297 1.5002822943110979E9
11.166590346155944 -0.3473777842028509	10.101890462487379 -0.9482078399388927	11.166590346155944 1.5100472853700075E9	10.101890462487379 1.2067363128393836E13	10.101890462487379 -0.010227309984360167	19.528952209735717 1.500278246404059E9
11.179564098926672 -0.3401706709757777	10.10580141567984 -0.9482084447385679	11.179564098926672 1.5084972581459916E9	10.10580141567984 1.2046290231772816E13	10.10580141567984 -0.010227417931874316	19.535127128274894 1.5002742726555226E9
11.195950671928674 -0.32986140322871993	10.109662858731276 -0.9482089817852986	11.195950671928674 1.5067752084558902E9	10.109662858731276 1.2023209798468596E13	10.109662858731276 -0.010227485194812314	19.54128698811198 1.5002703816235366E9
11.212351203255993 -0.3190926888782366	10.113502157440049 -0.948209451079074	11.212351203255993 1.5053336754957252E9	10.113502157440049 1.1998121828481176E13	10.113502157440049 -0.010227511773173159	19.54744627012024 1.5002665628976793E9
11.228778992443095 -0.3078645279243224	10.117508894436932 -0.9482099135520974	11.228778992443095 1.504172659265496E9	10.117508894436932 1.197028091608171E13	10.117508894436932 -0.010227480150182267	19.55360498639335 1.500262816477951E9
11.245247272985472 -0.2961769203669773	10.121455187247063 -0.9482103528571466	11.245247272985472 1.5032921597652032E9	10.121455187247063 1.1941619754500865E13	10.121455187247063 -0.010227401360443533	19.559763149028313 1.5002591423643513E9
11.262957899810878 -0.28392469744691784	10.125352532562527 -0.9482107689942341	11.262957899810878 1.5026017751151063E9	10.125352532562527 1.1912138343738635E13	10.125352532562527 -0.010227275403956959	19.5659062482398 1.500255548038715E9
11.28065148239922 -0.2722630286864325	10.130212947701958 -0.9482112591523224	11.28065148239922 1.5020562240996978E9	10.130212947701958 1.187361074689283E13	10.130212947701958 -0.01022705156085335	19.572048785519634 1.500252023297225E9
11.298344638534887 -0.261191914085523	10.135043531019983 -0.9482117226274083	11.298344638534887 1.501655506718978E9	10.135043531019983 1.1833485453501355E13	10.135043531019983 -0.010226764055688564	19.578190772845574 1.500248568139882E9
11.316053987202773 -0.2507113536441947	10.139860639818092 -0.948212159419481	11.316053987202773 1.5013996229729466E9	10.139860639818092 1.179176246356421E13	10.139860639818092 -0.01022641288846271	19.584332222198594 1.5002451825666857E9
11.33206630200634 -0.2419916680056966	10.145755140343724 -0.9482126869279925	11.33206630200634 1.5011959018871915E9	10.145755140343724 1.173909367126129E13	10.145755140343724 -0.010225902989645874	19.59045860381416 1.5002418726956315E9
11.348040329796893 -0.23375771317325	10.151671160587867 -0.948213215927157	11.348040329796893 1.5010300681973548E9	10.151671160587867 1.168453828448408E13	10.151671160587867 -0.010225312823125332	19.596584439030018 1.5002386283404386E9
11.363988237834683 -0.2260094891468567	10.157623557388971 -0.9482137464169673	11.363988237834683 1.5009021219034367E9	10.157623557388971 1.1628096303232582E13	10.157623557388971 -0.010224642388900862	19.602709739709017 1.5002354495011067E9
11.37992225321543 -0.21874699592651137	10.164821382478474 -0.9482144393443273	11.37992225321543 1.5008120630054374E9	10.164821382478474 1.1559022911589688E13	10.164821382478474 -0.01022374986600294	19.608834517717117 1.5002323361776361E9
11.39272029598737 -0.2131802164889054	10.172068954893799 -0.9482151642285546	11.39272029598737 1.5007398836078746E9	10.172068954893799 1.1488003481651271E13	10.172068954893799 -0.0102227638471869	19.61494422774953 1.5002292929928734E9
11.405524900295319 -0.2077423523720432	10.179372188015579 -0.9482159210696475	11.405524900295319 1.5006769324676366E9	10.179372188015579 1.1415038013417332E13	10.179372188015579 -0.010221684332452297	19.62105340655524 1.5002263097235577E9
11.418340312344665 -0.20243340357592476	10.188242759463296 -0.9482169376189153	11.418340312344665 1.500623209584723E9	10.188242759463296 1.132617063424503E13	10.188242759463296 -0.010220290903672269	19.627162065883237 1.5002233863696885E9
11.431170767610421 -0.19725337010054655	10.197117288473786 -0.9482178877214826	11.431170767610421 1.500578714959134E9	10.197117288473786 1.1234304269521865E13	10.197117288473786 -0.01021877123904913	19.633270217485503 1.5002205229312663E9
11.442729543315219 -0.19264380933831315	10.205996341778045 -0.9482187713773387	11.442729543315219 1.5005394963643842E9	10.205996341778045 1.1139438919247842E13	10.205996341778045 -0.010217125338582767	19.639363305481506 1.5002177226329148E9
11.454287424848127 -0.18807731172973963	10.215393317095787 -0.9482195016158768	11.454287424848127 1.5005037713314953E9	10.215393317095787 1.1033856944649938E13	10.215393317095787 -0.010215218921304392	19.6454558770711 1.5002149753097086E9
11.465847528672152 -0.18355387727482597	10.224728035687377 -0.9482191588573281	11.465847528672152 1.5004715398604674E9	10.224728035687377 1.0903610044250242E13	10.224728035687377 -0.010212773963920951	19.651547943890478 1.5002122809616477E9
11.477412969453816 -0.1790735059735722	10.234033996121308 -0.9482177431016856	11.477412969453816 1.5004428019513009E9	10.234033996121308 1.0748698218048752E13	10.234033996121308 -0.010209790466432334	19.65763951757872 1.5002096395887325E9
11.488064174967699 -0.17498558478191928	10.242771208613956 -0.9482158645717016	11.488064174967699 1.5004177519572272E9	10.242771208613956 1.0588775935063584E13	10.242771208613956 -0.010206576737835094	19.663716032393353 1.500207053378498E9
11.498709756980166 -0.17096377682098218	10.25149873100222 -0.9482146707630852	11.498709756980166 1.5003946289517126E9	10.25149873100222 1.0444232763802516E13	10.25149873100222 -0.010203584373932206	19.669792045276107 1.500204512470531E9
11.50935214700397 -0.1670080820907609	10.26021678189892 -0.9482141616758364	11.50935214700397 1.5003734329347568E9	10.26021678189892 1.0315068704265541E13	10.26021678189892 -0.010200813374723228	19.67586756775144 1.5002020168648307E9
11.519993778739881 -0.16311850059125543	10.26989783080268 -0.9482138823860415	11.519993778739881 1.5003541639063604E9	10.26989783080268 1.0176693100854594E13	10.26989783080268 -0.010197762356294438	19.68194261134659 1.5001995665613973E9
11.53041642313423 -0.15940422457294812	10.279546055793903 -0.9482137219680089	11.53041642313423 1.5003366940727303E9	10.279546055793903 1.0039952854307828E13	10.279546055793903 -0.010194669540287471	19.6880026010945 1.500197163252937E9
11.54082913429625 -0.15583248269022487	10.28916443611923 -0.9482136804217367	11.54082913429625 1.5003207052254758E9	10.28916443611923 9.904847964625238E12	10.28916443611923 -0.010191534926702439	19.694062103046175 1.5001947977751145E9
11.551234184638957 -0.15240327494308747	10.300611342140169 -0.9482136078058163	11.551234184638957 1.5003061973645973E9	10.300611342140169 9.742655303571059E12	10.300611342140169 -0.010187678178489978	19.700121128615393 1.5001924701279294E9
11.561633851597234 -0.14911660133153593	10.312005815186744 -0.9482135395619915	11.561633851597234 1.5002931704900944E9	10.312005815186744 9.580830458111043E12	10.312005815186744 -0.010183730748977382	19.70617968921863 1.500190180311382E9
11.5718624265731 -0.1461263778803792	10.323364622309306 -0.9482134756902605	11.5718624265731 1.5002817704925954E9	10.323364622309306 9.419373428245186E12	10.323364622309306 -0.010179692638164428	19.71222320131246 1.5001879301496296E9
11.582099215221294 -0.14325547036296893	10.336379819762415 -0.9482132581547686	11.582099215221294 1.5002712368417983E9	10.336379819762415 9.232478995173176E12	10.336379819762415 -0.010174898024712498	19.71826623941362 1.5001857115775926E9
11.592349493903734 -0.14050387877930337	10.349415336532184 -0.948213080260115	11.592349493903734 1.5002615695377028E9	10.349415336532184 9.046752574297203E12	10.349415336532184 -0.01017001084702085	19.72430881482627 1.500183524595271E9
11.602618518188276 -0.13787160312938784	10.36252988699535 -0.9482129420062906	11.602618518188276 1.5002527685803096E9	10.36252988699535 8.862194165617262E12	10.36252988699535 -0.010165031105088818	19.730350938857175 1.500181369202665E9
11.612829419177393 -0.13533789995948542	10.376746847707741 -0.9482129234825534	11.612829419177393 1.500244543094002E9	10.376746847707741 8.666954053563789E12	10.376746847707741 -0.01015962644246371	19.736378020044757 1.5001792477937932E9
11.623038038162212 -0.13287214851059037	10.391044529370511 -0.9482132525239093	11.623038038162212 1.5002367939807854E9	10.391044529370511 8.477654305507375E12	10.391044529370511 -0.010154265698700815	19.742404640717872 1.5001771536416385E9
11.633249591917764 -0.13047434878269915	10.405505413866589 -0.948213929130346	11.633249591917764 1.50022952124066E9	10.405505413866589 8.294294921448016E12	10.405505413866589 -0.01014894887379969	19.748430812072133 1.5001750867462008E9
11.643469292724806 -0.12814450077581885	10.419870981781308 -0.9482150272823828	11.643469292724806 1.5002227248736253E9	10.419870981781308 8.1211229386692705E12	10.419870981781308 -0.0101438191194958	19.75445654530565 1.50017304710748E9
11.652199321793463 -0.12619241541201998	10.434133177844958 -0.9482165683949573	11.652199321793463 1.5002171628318613E9	10.434133177844958 7.956609563770882E12	10.434133177844958 -0.01013885796886016	19.760467241705967 1.5001710379639206E9
11.660921191440972 -0.12426945954151858	10.448362450458516 -0.9482185524680693	11.660921191440972 1.5002118200924122E9	10.448362450458516 7.800754796752847E12	10.448362450458516 -0.010134065421892546	19.766477490751324 1.5001690537974715E9
11.669638146267152 -0.12237563316430933	10.461876168096083 -0.9482208289923806	11.669638146267152 1.5002066966552784E9	10.461876168096083 7.659748417156641E12	10.461876168096083 -0.010129661015375602	19.772487303529825 1.5001670946081328E9
11.678353436361014 -0.120510936280394	10.47512098368772 -0.9482235317468186	11.678353436361014 1.5002017925204597E9	10.47512098368772 7.527624907307993E12	10.47512098368772 -0.010125479744755084	19.77849669113199 1.5001651603959043E9
11.685635015027067 -0.1189658437029868	10.488170121580126 -0.9482266607313727	11.685635015027067 1.5001978053255396E9	10.488170121580126 7.404384267206901E12	10.488170121580126 -0.010121521610030548	19.784491048269995 1.5001632551895318E9
11.69290715355252 -0.11743198828922008	10.501398946241107 -0.9482303522908451	11.69290715355252 1.5001939244065316E9	10.501398946241107 7.286555588154577E12	10.501398946241107 -0.010117694515384579	19.790484970900405 1.500161374422005E9
11.700171729732377 -0.11590937003909563	10.514425021440998 -0.9482347836255096	11.700171729732377 1.5001901497634356E9	10.514425021440998 7.177670553758198E12	10.514425021440998 -0.010114127793627636	19.796478470004875 1.5001595180933232E9
11.707430627230526 -0.11439798895261521	10.527339290522537 -0.9482399547353593	11.707430627230526 1.500186481396252E9	10.527339290522537 7.077729164017762E12	10.527339290522537 -0.010110821444759388	19.802471556567387 1.500157686203487E9
11.713610897200626 -0.1131328258065567	10.541578288058961 -0.9482468254626637	11.713610897200626 1.5001834578266356E9	10.541578288058961 6.977820221429769E12	10.541578288058961 -0.010107499429733435	19.808449619407657 1.500155883221731E9
11.719790729019719 -0.11185415464433657	10.555888826518014 -0.9482554423686347	11.719790729019719 1.500180451889968E9	10.555888826518014 6.886644667781902E12	10.555888826518014 -0.010104462472921738	19.81442726028205 1.500154105103289E9
11.725975796190014 -0.11056197546595303	10.570359351040947 -0.9482658054532598	11.725975796190014 1.5001774635862489E9	10.570359351040947 6.804202503074161E12	10.570359351040947 -0.010101710574323852	19.820404490066817 1.5001523518481605E9
11.732171757832054 -0.10925628827140788	10.587232598608798 -0.9482805860573036	11.732171757832054 1.500174492915478E9	10.587232598608798 6.721419612909752E12	10.587232598608798 -0.010098967162951222	19.82638131964046 1.5001506234563458E9
11.737888517381716 -0.10802582434829855	10.604439769800626 -0.9483000586424071	11.737888517381716 1.5001717299147089E9	10.604439769800626 6.648962140148324E12	10.604439769800626 -0.010096594742262321	19.832343132619734 1.5001489244229503E9
11.743596000110871 -0.10673470599405288	10.622053470603309 -0.9483242232085543	11.743596000110871 1.5001688792449834E9	10.622053470603309 6.586830084789876E12	10.622053470603309 -0.010094593312256706	19.83830453587561 1.5001472506057687E9
11.749298652233557 -0.10538293320867442	10.638492726257414 -0.948352158358202	11.749298652233557 1.5001659409063017E9	10.638492726257414 6.540286363410004E12	10.638492726257414 -0.010093150672758955	19.844265540179986 1.5001456020048018E9
11.755000931263467 -0.10397050599216673	10.655245922329895 -0.9483885901576334	11.755000931263467 1.5001629148986635E9	10.655245922329895 6.502973065731114E12	10.655245922329895 -0.010092040980107408	19.85022615630692 1.5001439786200492E9
11.759150016088286 -0.10282053030385274	10.672337377659916 -0.9484335186068416	11.759150016088286 1.50016048679893E9	10.672337377659916 6.474890191753207E12	10.672337377659916 -0.010091264234301622	19.85617176336554 1.5001423843789978E9
11.763299100913105 -0.10161547904648938	10.685957748390523 -0.948477378308799	11.763299100913105 1.5001579811120036E9	10.685957748390523 6.460359436299894E12	10.685957748390523 -0.010090922941002778	19.862116972650334 1.5001408146662598E9
11.767455473209138 -0.10035535222007841	10.699734930915724 -0.9485321909082858	11.767455473209138 1.5001553978378844E9	10.699734930915724 6.453088741774237E12	10.699734930915724 -0.010090812430312956	19.86806179482988 1.5001392694818347E9
11.771626382249453 -0.09904014982462339	10.713673706436719 -0.9485979564052931	11.771626382249453 1.5001527369765723E9	10.713673706436719 6.453078108176233E12	10.713673706436719 -0.010090932702232047	19.874006240574843 1.5001377488257227E9
11.775797291289756 -0.09767957860473775	10.724863377822443 -0.9486611850400033	11.775797291289756 1.5001500298061047E9	10.724863377822443 6.459290481901352E12	10.724863377822443 -0.010091213896320728	19.87993568518713 1.5001362556269903E9
11.779953663585776 -0.09628967512087261	10.736120790030837 -0.9487379943216725	11.779953663585776 1.5001473097260253E9	10.736120790030837 6.472211167409935E12	10.736120790030837 -0.010091667559592121	19.885864743688497 1.500134784876374E9
11.784102748410582 -0.09487043937302264	10.74744684244484 -0.9488283842502847	11.784102748410582 1.500144576736334E9	10.74744684244484 6.49184016470198E12	10.74744684244484 -0.010092293692045784	19.89179342664524 1.5001333365738742E9
11.788251833235389 -0.0934218713611914	10.7566200611249 -0.9489147614917508	11.788251833235389 1.5001418308370306E9	10.7566200611249 6.513776808758972E12	10.7566200611249 -0.010092942338845279	19.897721744625667 1.5001319107194908E9
11.794164216053618 -0.09131818184815987	10.765817827338532 -0.9490181175391585	11.794164216053618 1.500137921902239E9	10.765817827338532 6.542905264308197E12	10.765817827338532 -0.010093738342372038	19.903635069829246 1.5001305093415627E9
11.800093933453761 -0.08915466599291566	10.775040273524812 -0.9491384523925168	11.800093933453761 1.5001339999011216E9	10.775040273524812 6.579225531349654E12	10.775040273524812 -0.010094681702625952	19.909548020304307 1.5001291274972887E9
11.806057189253124 -0.08693132379546409	10.782567389239361 -0.9492558700856568	11.806057189253124 1.5001300648336785E9	10.782567389239361 6.616617355530673E12	10.782567389239361 -0.010095601338137805	19.9154606065159 1.5001277651866686E9
11.812069916125226 -0.08464815525580693	10.790099616190776 -0.9494037277062768	11.812069916125226 1.5001261166999094E9	10.790099616190776 6.666167411294934E12	10.790099616190776 -0.010096748541095546	19.921372838931017 1.5001264224097025E9
11.818035325072218 -0.08233133948352833	10.797636961162203 -0.9495820252543714	11.818035325072218 1.5001222135855749E9	10.797636961162203 6.727875698642433E12	10.797636961162203 -0.010098123311499174	19.927270087355115 1.5001251008094583E9
11.823985784772407 -0.07998866127435544	10.803610373870436 -0.9497516058841002	11.823985784772407 1.5001183590274632E9	10.803610373870436 6.787325617418792E12	10.803610373870436 -0.010099346804593012	19.93316697215868 1.5001237957711508E9
11.829937404923605 -0.07762012062829182	10.809630375166332 -0.9499313616590443	11.829937404923605 1.500114553025574E9	10.809630375166332 6.849953852732151E12	10.809630375166332 -0.010100531191925999	19.939063503706546 1.5001225072947803E9
11.83590628582764 -0.07522571754533569	10.81569696952409 -0.9501212925792055	11.83590628582764 1.5001107955799074E9	10.81569696952409 6.915760404582508E12	10.81569696952409 -0.010101676473498578	19.944959692365412 1.5001212353803468E9
11.842354237437425 -0.07263445364858878	10.820765750815735 -0.9502948441384946	11.842354237437425 1.5001068406568055E9	10.820765750815735 6.976193318318669E12	10.820765750815735 -0.010102658315982116	19.95084090625817 1.5001199816374264E9
11.84874538304062 -0.07011013175470016	10.825774568601453 -0.95048288656215	11.84874538304062 1.5001030720008287E9	10.825774568601453 7.042238840038976E12	10.825774568601453 -0.010103668770709007	19.95672176736996 1.5001187417126992E9
11.855099333413149 -0.06765275186367692	10.830724177897798 -0.950685419850168	11.855099333413149 1.500099489611977E9	10.830724177897798 7.113896969743425E12	10.830724177897798 -0.01010470783767925	19.962602285966426 1.500117515606166E9
11.861436044674361 -0.0652623139755173	10.83505711043823 -0.9508812658097492	11.861436044674361 1.500096093490251E9	10.83505711043823 7.183833219430071E12	10.83505711043823 -0.010105668159529735	19.968482472315 1.500116303317826E9
11.868687230617267 -0.0627651302202148	10.839282750816995 -0.9510904867909931	11.868687230617267 1.5000926314449472E9	10.839282750816995 7.259290854068146E12	10.839282750816995 -0.010106650276777929	19.974347693569804 1.500115106438884E9
11.875943522538929 -0.06034966452588275	10.843403228217454 -0.9513130827938996	11.875943522538929 1.5000893509153054E9	10.843403228217454 7.340269873657648E12	10.843403228217454 -0.01010765418942372	19.980212572620708 1.5001139206979942E9
11.883206563303158 -0.05801591689252117	10.847098010990857 -0.9515339935173932	11.883206563303158 1.500086251901325E9	10.847098010990857 7.421433596075787E12	10.847098010990857 -0.01010860957228954	19.986077119635176 1.500112746095157E9
11.890477991199383 -0.05576388732012827	10.850662399769774 -0.9517673614652749	11.890477991199383 1.5000833344030066E9	10.850662399769774 7.5081159552773955E12	10.850662399769774 -0.010109579048607653	19.9919413447824 1.5001115826303718E9
11.898696478411196 -0.05327278706263794	10.854100876513787 -0.952013186637541	11.898696478411196 1.5000801752118359E9	10.854100876513787 7.600316951262469E12	10.854100876513787 -0.010110562618377839	19.997790614963268 1.5001104317218838E9
11.906916738716104 -0.050830420255247866	10.857457686550413 -0.952285658836316	11.906916738716104 1.5000771427146115E9	10.857457686550413 7.703645370647572E12	10.857457686550413 -0.010111604719676204	20.003639553260633 1.5001092891722307E9
11.915141157670393 -0.04843678689795805	10.86065644471727 -0.9525827420877464	11.915141157670393 1.5000742369113336E9	10.86065644471727 7.817925191913021E12	10.86065644471727 -0.0101126928469637	20.0094881697448 1.5001081549814124E9
11.923372117214479 -0.04609188699076494	10.86370870166952 -0.9529044363918233	11.923372117214479 1.5000714578020022E9	10.86370870166952 7.943156415058815E12	10.86370870166952 -0.010113827000239883	20.01533647448773 1.500107029149429E9
11.933172260413826 -0.04335251799536177	10.867367905374442 -0.9532937600350868	11.933172260413826 1.5000682882688596E9	10.867367905374442 8.096965107456511E12	10.867367905374442 -0.010115110921562143	20.021169834853712 1.5001059130025547E9
11.942966860604445 -0.040668895575600494	10.870933556061232 -0.9536548692193341	11.942966860604445 1.5000652547901008E9	10.870933556061232 8.241145935552611E12	10.870933556061232 -0.010116244257893592	20.027002873405667 1.5001048025783136E9
11.952759945749646 -0.03804101973148466	10.874408361101885 -0.9539877639445722	11.952759945749646 1.5000623573657258E9	10.874408361101885 8.375698899347118E12	10.874408361101885 -0.010117227009234009	20.03283560011775 1.5001036978767061E9
11.96255554568171 -0.035468890463010716	10.878898155195026 -0.9544157181398019	11.96255554568171 1.5000595959957347E9	10.878898155195026 8.551003366343423E12	10.878898155195026 -0.010118419956728353	20.038668024965713 1.500102598897732E9
11.974383714269685 -0.0324262185560622	10.883254653245999 -0.9548358168036595	11.974383714269685 1.5000564180430374E9	10.883254653245999 8.7259529742321875E12	10.883254653245999 -0.010119532451183355	20.04448551719379 1.5001015071192327E9
11.986189736676337 -0.02945110691963837	10.887484667290138 -0.9552480599361433	11.986189736676337 1.5000533932087672E9	10.887484667290138 8.90054772301341E12	10.887484667290138 -0.01012056449259835	20.050302697431995 1.5001004190542688E9
11.99798064442809 -0.02654355555373744	10.892971214518475 -0.9557898876513837	11.99798064442809 1.500050521492924E9	10.892971214518475 9.134597064784826E12	10.892971214518475 -0.010121838998453425	20.056119575559332 1.5000993347028413E9
12.009763496110832 -0.02370356445835231	10.89829264183385 -0.9563222429222202	12.009763496110832 1.500047802895508E9	10.89829264183385 9.369619385695385E12	10.89829264183385 -0.010123020025645468	20.06193616145635 1.5000982540649495E9
12.021771911987617 -0.02083869588648657	10.903465123230621 -0.9568451257486421	12.021771911987617 1.5000451385176854E9	10.903465123230621 9.605614685745086E12	10.903465123230621 -0.01012410757417459	20.067737830969385 1.5000971789962513E9
12.033780502916503 -0.01803762079311877	10.91010619864027 -0.957515596416683	12.033780502916503 1.5000426042239459E9	10.91010619864027 9.916145407755646E12	10.91010619864027 -0.010125402591511623	20.07353919807654 1.500096106444034E9
12.045791570497986 -0.015300339178261346	10.916606244396338 -0.9581687119231921	12.045791570497986 1.5000402000142894E9	10.916606244396338 1.0226752041646078E13	10.916606244396338 -0.010126579751611353	20.0793402725627 1.500095036408298E9
12.057807414909377 -0.01262685104190897	10.92299468220088 -0.9588044722681586	12.057807414909377 1.500037925888716E9	10.92299468220088 1.053743458741638E13	10.92299468220088 -0.01012763905447378	20.08514106421423 1.500093968889043E9
12.070737475914216 -0.009828867873395986	10.930967596954433 -0.9595674101866782	12.070737475914216 1.5000356209561422E9	10.930967596954433 1.0921608920389088E13	10.930967596954433 -0.010128804059712615	20.090926957188863 1.5000929061159506E9
12.083662005867414 -0.007113735567492619	10.938914542159866 -0.9602997236348392	12.083662005867414 1.50003344831891E9	10.938914542159866 1.1300741728678197E13	10.938914542159866 -0.010129834440788077	20.0967125571069 1.5000918452820785E9
12.096583870753848 -0.00448145412419887	10.946863783281014 -0.9610014126126378	12.096583870753848 1.5000314079770193E9	10.946863783281014 1.1674833012283705E13	10.946863783281014 -0.01013073019770061	20.102497873660127 1.500090786387427E9
12.109505938331655 -0.0019320235435165154	10.956486373737365 -0.9617844540101013	12.109505938331655 1.50002949993047E9	10.956486373737365 1.2104324601683574E13	10.956486373737365 -0.010131632535583912	20.108282916541746 1.5000897294319963E9
12.125377053440074 0.0010996124912550078	10.96620964286359 -0.9625234725263327	12.125377053440074 1.500027316363439E9	10.96620964286359 1.2519079768261648E13	10.96620964286359 -0.010132397167697205	20.114053078562883 1.5000886768555365E9
12.141247919068986 0.003994683291751676	10.976039202076478 -0.9632184681613181	12.141247919068986 1.5000253025287726E9	10.976039202076478 1.291909851201793E13	10.976039202076478 -0.010133024094040044	20.11982295664751 1.500087625964762E9
12.157121018359556 0.0067531888579699375	10.987658494319804 -0.9639566686813934	12.157121018359556 1.5000234584264705E9	10.987658494319804 1.3350841027185453E13	10.987658494319804 -0.010133592419499515	20.125592560395315 1.5000865767596722E9
12.172998833404977 0.009375129189915121	10.99946752956174 -0.9646529598489133	12.172998833404977 1.5000217840565324E9	10.99946752956174 1.3762375058796502E13	10.99946752956174 -0.010134017937969975	20.13136189940736 1.5000855292402678E9
12.187281025322301 0.011612537796746203	11.011480066764097 -0.9653073416638618	12.187281025322301 1.500020405283293E9	11.011480066764097 1.4153700606851076E13	11.011480066764097 -0.010134300649450423	20.137116375495985 1.5000844860132082E9
12.201559401455732 0.013717066536272249	11.023202245734037 -0.9658953805602257	12.201559401455732 1.5000191473934886E9	11.023202245734037 1.4502421322751121E13	11.023202245734037 -0.010134431518447728	20.1428705765444 1.500083444459353E9
12.215835768381847 0.01568871540849326	11.03530529261069 -0.9664854705540167	12.215835768381847 1.5000180103871193E9	11.03530529261069 1.4853243760006523E13	11.03530529261069 -0.010134441597465571	20.148624512061204 1.5000824045787022E9
12.230111933439986 0.017527484413402128	11.04787165883038 -0.9670776116452275	12.230111933439986 1.500016994264185E9	11.04787165883038 1.5206167918617283E13	11.04787165883038 -0.010134330886503617	20.154378191556315 1.500081366371256E9
12.240781702297564 0.01876322823319132	11.059169577313117 -0.9676014018334778	12.240781702297564 1.5000163267109675E9	11.059169577313117 1.5517094157836062E13	11.059169577313117 -0.0101341302827882	20.160117026196463 1.5000803325509071E9
12.251482304704966 0.01995453597141239	11.071141341257146 -0.9681841444594648	12.251482304704966 1.5000156974096484E9	11.071141341257146 1.5873880996755584E13	11.071141341257146 -0.010133857257683343	20.16585559447424 1.5000793006529176E9
12.262246924994619 0.021101407628067115	11.083875302750078 -0.9688258395231832	12.262246924994619 1.5000151063602278E9	11.083875302750078 1.6276528435375844E13	11.083875302750078 -0.010133511811188822	20.17159390580816 1.5000782706772876E9
12.273108160733312 0.02220384320315727	11.099092525096918 -0.9696809472763865	12.273108160733312 1.5000145535627053E9	11.099092525096918 1.6846363410334508E13	11.099092525096918 -0.010133073928733971	20.17733196961799 1.5000772426240168E9
12.28314033207681 0.02320309215369587	11.113480233708781 -0.9705300058348749	12.28314033207681 1.5000140597151542E9	11.113480233708781 1.743672684578626E13	11.113480233708781 -0.010132587018606087	20.18305520678287 1.5000762193120508E9
12.293145865619161 0.024190218600499414	11.127039240498268 -0.9713730151986271	12.293145865619161 1.5000135809593096E9	11.127039240498268 1.8047618741731098E13	11.127039240498268 -0.010132051080804838	20.188778186050005 1.5000751984242618E9
12.303151399161512 0.025165222543566124	11.146167339655673 -0.9726211872336945	12.303151399161512 1.5000131172951713E9	11.146167339655673 1.9000874096980227E13	11.146167339655673 -0.010131145979337286	20.19450091674879 1.50007417996065E9
12.31318357050501 0.026128103982894224	11.163785541349329 -0.9738218773312814	12.31318357050501 1.5000126687227395E9	11.163785541349329 1.9970274060768805E13	11.163785541349329 -0.010130154556911242	20.200223408209844 1.500073163921215E9
12.324044806243707 0.027169088726137325	11.179894123558915 -0.9749750854913861	12.324044806243707 1.5000121913784406E9	11.179894123558915 2.0955818633096824E13	11.179894123558915 -0.01012907681352615	20.205931091387153 1.500072153237002E9
12.334809426533363 0.028218407119781297	11.1998723337258 -0.97650190871106	12.334809426533363 1.5000117201922762E9	11.1998723337258 2.235225104447633E13	11.1998723337258 -0.01012748330569424	20.21163852492326 1.5000711456880472E9
12.345510028940769 0.02927605916382614	11.218085566162406 -0.9779687184686638	12.345510028940769 1.5000112551642463E9	11.218085566162406 2.379199492898819E13	11.218085566162406 -0.010125751010187423	20.217345718059434 1.5000701412743504E9
12.356179797798353 0.03034204485827896	11.234547108297937 -0.9793755147641976	12.356179797798353 1.500010796294351E9	11.234547108297937 2.5275050286632406E13	11.234547108297937 -0.010123879927005475	20.223052680038116 1.5000691399959118E9
12.366827688264571 0.03146194155783366	11.250652762876047 -0.980847439110959	12.366827688264571 1.5000103225627766E9	11.250652762876047 2.6937986480845297E13	11.250652762876047 -0.010121689998932482	20.228744852254536 1.5000681448353655E9
12.377491003057036 0.03261430137802268	11.266379319732357 -0.982318863730753	12.377491003057036 1.5000098484729636E9	11.266379319732357 2.8713896997205836E13	11.266379319732357 -0.010119195989069074	20.23443678288328 1.5000671536245399E9
12.388176275230254 0.03379912431884069	11.281839372983967 -0.983789788623576	12.388176275230254 1.5000093740249124E9	11.281839372983967 3.060278183571402E13	11.281839372983967 -0.010116397897415252	20.240128481078454 1.5000661663634343E9
12.398889997671036 0.03501641038029124	11.298206199826868 -0.9853105273360265	12.398889997671036 1.500008899218623E9	11.298206199826868 3.2682208628214617E13	11.298206199826868 -0.010113061202659979	20.245819955995298 1.500065183052049E9
12.410971510182543 0.036419613554655506	11.314516923991416 -0.9867662672736879	12.410971510182543 1.5000083666926305E9	11.314516923991416 3.477609787084477E13	11.314516923991416 -0.010109467260883798	20.251496659840207 1.5000642066508174E9
12.423053826692453 0.037869208931085474	11.330866545189561 -0.9881570084365547	12.423053826692453 1.5000078394552882E9	11.330866545189561 3.688444956360445E13	11.330866545189561 -0.010105616072086154	20.257173129952914 1.50006323500734E9
12.435146418145806 0.039365196509581146	11.350715057279555 -0.9896943253763721	12.435146418145806 1.5000073175065963E9	11.350715057279555 3.9325331210945234E13	11.350715057279555 -0.010100772998335561	20.262849375401334 1.5000622681216173E9
12.447258731384903 0.040907576290140746	11.370548480069361 -0.991124515920867	12.447258731384903 1.5000068008465545E9	11.370548480069361 4.168879553879243E13	11.370548480069361 -0.010095753116487138	20.268525405254454 1.5000613059936492E9
12.459776670705038 0.042554618218752616	11.390390194322379 -0.992447580070027	12.459776670705038 1.5000062686160505E9	11.390390194322379 4.397484254714601E13	11.390390194322379 -0.010090556426540442	20.27418668290289 1.5000603515020828E9
12.472274580636943 0.04429447140541942	11.408250293483766 -0.9935481540757012	12.472274580636943 1.5000057437384834E9	11.408250293483766 4.592077599654024E13	11.408250293483766 -0.010085815276497212	20.279847734481432 1.500059402491028E9
12.484762893251999 0.04612713585014294	11.427739580947287 -0.9946596590664187	12.484762893251999 1.5000052262138534E9	11.427739580947287 4.79352254152861E13	11.427739580947287 -0.010080559197518046	20.285508568972748 1.5000584589604847E9
12.497252064671212 0.04805261155292495	11.448860459863688 -0.9957820950421743	12.497252064671212 1.50000471604216E9	11.448860459863688 5.0018190803383586E13	11.448860459863688 -0.01007478818960239	20.29116919536053 1.5000575209104528E9
12.508590699590867 0.04994111402283696	11.463928220181188 -0.9965244934432134	12.508590699590867 1.5000042347195878E9	11.463928220181188 5.141124103694797E13	11.463928220181188 -0.010070650284174976	20.296815088595384 1.5000565910975842E9
12.519897483282284 0.05217093284588348	11.479851771941046 -0.9972574320898717	12.519897483282284 1.500003741554982E9	11.479851771941046 5.279097339535345E13	11.479851771941046 -0.010066286412166892	20.30246076323428 1.5000556673603663E9
12.531180107463172 0.05474206802205739	11.496631301608181 -0.9979809109821369	12.531180107463172 1.5000032365483427E9	11.496631301608181 5.4157387878600016E13	11.496631301608181 -0.010061696573577805	20.308106228175575 1.5000547496987996E9
12.54244631333424 0.057654519551364025	11.509154186408201 -0.9984843233004446	12.54244631333424 1.5000027196996698E9	11.509154186408201 5.510110147406423E13	11.509154186408201 -0.010058302969764288	20.31375149231862 1.5000538381128836E9
12.553687648939817 0.06114858720639038	11.522158290202213 -0.9989712327811757	12.553687648939817 1.5000022373714561E9	11.522158290202213 5.599691248870986E13	11.522158290202213 -0.01005484143670532	20.319382356066257 1.5000529351706617E9
12.564978830061337 0.06469497012213044	11.535643630863406 -0.9994416394243233	12.564978830061337 1.5000018848254628E9	11.535643630863406 5.684482092253692E13	11.535643630863406 -0.010051311974401012	20.325013008484348 1.5000520387620654E9
12.576354799897688 0.06829366829858774	11.546900098438783 -0.9997985561742508	12.576354799897688 1.5000016620616899E9	11.546900098438783 5.7455985948398375E13	11.546900098438783 -0.010048463220277748	20.33064345838935 1.5000511488870947E9
12.587849728431307 0.07194468173576407	11.557392377944247 -1.0001101378725155	12.587849728431307 1.5000015690801375E9	11.557392377944247 5.796506184163186E13	11.557392377944247 -0.010045867310054302	20.336273714598676 1.5000502655457494E9
12.597993454215919 0.07535230215321942	11.567125840338166 -1.0003763845191154	12.597993454215919 1.5000015979152246E9	11.567125840338166 5.837204860223735E13	11.567125840338166 -0.01004352424373045	20.34204908931308 1.5000493664347355E9
12.60812725017113 0.07894372174045561	11.576396140756371 -1.0006130654932912	12.60812725017113 1.5000017831230385E9	11.576396140756371 5.870480884764683E13	11.576396140756371 -0.01004134145534652	20.34782424784753 1.500048474588788E9
12.618275912024117 0.08271894049747264	11.584985629924281 -1.000819467896373	12.618275912024117 1.5000021247035792E9	11.584985629924281 5.896928500853312E13	11.584985629924281 -0.010039358833571876	20.353599199702913 1.5000475900079064E9
12.628464126962305 0.08667795842427051	11.592904117982346 -1.0009955917283522	12.628464126962305 1.5000026226568468E9	11.592904117982346 5.916547708489621E13	11.592904117982346 -0.010037576378406077	20.359373954381127 1.5000467126920907E9
12.637620344223938 0.09044264649646205	11.600520202814428 -1.001154335722938	12.637620344223938 1.5000032490945268E9	11.600520202814428 5.931185723871205E13	11.600520202814428 -0.010035891971407529	20.365435039830057 1.5000457998585014E9
12.64673282645294 0.09437612379804161	11.607549906614445 -1.0012930413931693	12.64673282645294 1.5000040810067768E9	11.607549906614445 5.941421183620339E13	11.607549906614445 -0.010034358642864394	20.37149589383755 1.5000448953456917E9
12.655819362326474 0.09847839032900563	11.614011824360741 -1.0014117087390337	12.655819362326474 1.500005118393597E9	11.614011824360741 5.947254087737025E13	11.614011824360741 -0.010032976392776782	20.377556527371244 1.5000439991536613E9
12.664897893042601 0.10274944608935588	11.620200586790972 -1.0015195030309227	12.664897893042601 1.5000063612549868E9	11.620200586790972 5.949820021891298E13	11.620200586790972 -0.010031662727309265	20.38361695139997 1.5000431112824106E9
12.673305398060911 0.10689131009647657	11.625950908193552 -1.0016159991094353	12.673305398060911 1.50000774902208E9	11.625950908193552 5.9501881704704375E13	11.625950908193552 -0.010030446552995453	20.389977879566533 1.5000421884632125E9
12.68164874830342 0.11117505162134034	11.631294251441437 -1.0017011969745662	12.68164874830342 1.5000093847793424E9	11.631294251441437 5.948358533474444E13	11.631294251441437 -0.010029327869834459	20.3963385603895 1.5000412750539126E9
12.689941461307745 0.11560067066394364	11.636418529699675 -1.001781189325743	12.689941461307745 1.500011268526774E9	11.636418529699675 5.945248098263884E13	11.636418529699675 -0.010028251993722925	20.40269900652909 1.5000403710545106E9
12.698197303344854 0.12016816722429002	11.641305920848152 -1.001857484088478	12.698197303344854 1.5000134002643747E9	11.641305920848152 5.9419338844845375E13	11.641305920848152 -0.01002721956776198	20.409059230646942 1.5000394764650068E9
12.706167039207802 0.1248157495438269	11.645994338823023 -1.0019300812627678	12.706167039207802 1.5000157807379856E9	11.645994338823023 5.938415892136399E13	11.645994338823023 -0.010026230591950847	20.415734831693342 1.5000385477242458E9
12.714192646290442 0.12963782626871367	11.651167242939865 -1.0020127434610062	12.714192646290442 1.5000184960087996E9	11.651167242939865 5.935906520698964E13	11.651167242939865 -0.010025134697873361	20.42241016890482 1.500037629522783E9
12.722302053271934 0.13463439739895744	11.656292727932474 -1.0020993028480705	12.722302053271934 1.500021546076816E9	11.656292727932474 5.9356600921331414E13	11.656292727932474 -0.010024029557935243	20.42908525689472 1.5000367218606188E9
12.730522334736996 0.13980546293455465	11.661406729796514 -1.0021897594239606	12.730522334736996 1.5000249309420354E9	11.661406729796514 5.937676606438928E13	11.661406729796514 -0.010022915172136493	20.435760110278032 1.5000358247377527E9
12.738591859175447 0.14498499516526397	11.667511409686034 -1.0023087361689784	12.738591859175447 1.5000285970735624E9	11.667511409686034 5.946114064844196E13	11.667511409686034 -0.010021552004290668	20.442765946841554 1.5000348945094135E9
12.746661383613898 0.15021649966808415	11.673782175108697 -1.0024449135744407	12.746661383613898 1.5000325611188595E9	11.673782175108697 5.961584709281317E13	11.673782175108697 -0.010020081139190284	20.44977150256015 1.5000339760072494E9
12.75475871414587 0.1554999764430205	11.680231780591713 -1.0025982916403384	12.75475871414587 1.5000368230779266E9	11.680231780591713 5.984088539750291E13	11.680231780591713 -0.010018502576835009	20.456776794300815 1.5000330692312603E9
12.762911372356944 0.1608354254900748	11.68756375954078 -1.0027981270245307	12.762911372356944 1.500041382950764E9	11.68756375954078 6.02150576392564E13	11.68756375954078 -0.010016559987458873	20.463781838932448 1.5000321741814463E9
12.771064030568017 0.16617063333115478	11.69522642772107 -1.0030330537693706	12.771064030568017 1.5000462298782213E9	11.69522642772107 6.072036938846796E13	11.69522642772107 -0.01001432446837569	20.47113424215216 1.5000312473672562E9
12.77916136109999 0.1714484830709404	11.703221043321195 -1.0033030718748508	12.77916136109999 1.500051281540223E9	11.703221043321195 6.1356820645137586E13	11.703221043321195 -0.01001179601958535	20.478486347091085 1.5000303335459554E9
12.787230885538438 0.17666897470942633	11.710712508277926 -1.0035866716246984	12.787230885538438 1.5000565379367688E9	11.710712508277926 6.208206698399811E13	11.710712508277926 -0.010009146662047885	20.48583817321651 1.5000294327175443E9
12.795300409976887 0.18183210824662144	11.718585137699632 -1.003908784383353	12.795300409976887 1.500061999067859E9	11.718585137699632 6.294923383573634E13	11.718585137699632 -0.01000606285872685	20.49318973999795 1.5000285448820229E9
12.80352069144195 0.1869947144681765	11.726857417031525 -1.0042694101508074	12.80352069144195 1.500067739970685E9	11.726857417031525 6.3958321200352266E13	11.726857417031525 -0.010002544609622244	20.50090585178262 1.5000276269794545E9
12.811630098423441 0.19199164938811375	11.733239417807972 -1.0045649402885735	12.811630098423441 1.5000735372669525E9	11.733239417807972 6.481531344831452E13	11.733239417807972 -0.009999563831191605	20.5086216475434 1.5000267234552922E9
12.81965570550608 0.19682291300643318	11.739925402755496 -1.004884918676729	12.81965570550608 1.5000793909566612E9	11.739925402755496 6.576778440831018E13	11.739925402755496 -0.00999620352546704	20.51633714974779 1.500025834309536E9
12.827625441369028 0.20148850532313123	11.746929654569087 -1.0052293453152616	12.827625441369028 1.5000853010398116E9	11.746929654569087 6.681573408033921E13	11.746929654569087 -0.009992463692448217	20.524052380865854 1.5000249595421858E9
12.8351203608405 0.2056816367250276	11.752197568884757 -1.0054954942716465	12.8351203608405 1.5000908208042543E9	11.752197568884757 6.764443965572814E13	11.752197568884757 -0.009989446439941596	20.532150196469907 1.5000240568355947E9
12.842615852677602 0.20974623555824312	11.757675223023675 -1.0057781005064603	12.842615852677602 1.5000963575848002E9	11.757675223023675 6.854405023025193E13	11.757675223023675 -0.009986103654900824	20.540247678148734 1.5000231700631697E9
12.85012218564613 0.21368230182278314	11.763369009846189 -1.0060771640197084	12.85012218564613 1.5001019113814492E9	11.763369009846189 6.951456580391053E13	11.763369009846189 -0.009982435337326234	20.548344851831413 1.5000222992249103E9
12.857649584144083 0.21748983551864054	11.768772988548909 -1.0063720999956365	12.857649584144083 1.5001074821942015E9	11.768772988548909 7.049784927399919E13	11.768772988548909 -0.00997864032885365	20.55644174344997 1.500021444320817E9
12.865597607687901 0.22135163004694203	11.774369147235591 -1.0066735067697659	12.865597607687901 1.5001133416538098E9	11.774369147235591 7.151766655188792E13	11.774369147235591 -0.009974537008133555	20.56494014836667 1.5000205641499515E9
12.873522152540028 0.2250023671994379	11.78018945721851 -1.0069813843420823	12.873522152540028 1.500119049778499E9	11.78018945721851 7.25740176375767E13	11.78018945721851 -0.009970125375165506	20.573438201483725 1.500019701702557E9
12.88143525090744 0.2284420469761228	11.786799022800531 -1.0073135197236924	12.88143525090744 1.5001246065682688E9	11.786799022800531 7.372670539528216E13	11.786799022800531 -0.00996501311184006	20.581935932724026 1.500018856978634E9
12.889348987207695 0.23167066937700564	11.793668549304535 -1.0076406983051447	12.889348987207695 1.5001300120231197E9	11.793668549304535 7.487658857284022E13	11.793668549304535 -0.00995957161467631	20.590433372013862 1.5000180299781826E9
12.89607548086916 0.23408307882816626	11.800820375882882 -1.007962920086432	12.89607548086916 1.5001341433799531E9	11.800820375882882 7.602366717025083E13	11.800820375882882 -0.009953800883673813	20.599352185385598 1.500017181064193E9
12.902802125281793 0.23639290549032754	11.808967959727205 -1.0082998652033206	12.902802125281793 1.5001381827343895E9	11.808967959727205 7.72390335917509E13	11.808967959727205 -0.009947137478605206	20.608270629337003 1.5000163519751105E9
12.909541447427971 0.2386001493634895	11.81739723713382 -1.0086185641496117	12.909541447427971 1.5001421300864294E9	11.81739723713382 7.840406915909411E13	11.81739723713382 -0.009940102701027298	20.61718873839882 1.5000155427109346E9
12.91630590385739 0.24070481044764858	11.826123760386093 -1.0089190169253	12.91630590385739 1.500145985436072E9	11.826123760386093 7.951877387228044E13	11.826123760386093 -0.009932696550939757	20.62610654710568 1.5000147532716656E9
12.923152030969263 0.24279842512817584	11.836208752523408 -1.009222808964041	12.923152030969263 1.500149884665436E9	11.836208752523408 8.066532732819295E13	11.836208752523408 -0.009924000538432232	20.63546656752011 1.5000139461203017E9
12.92997241537375 0.2448746179706669	11.846549272570593 -1.0094901069655746	12.92997241537375 1.5001538364715621E9	11.846549272570593 8.169198524904633E13	11.846549272570593 -0.009914870414109767	20.644826201422607 1.500013161289363E9
12.936779969121048 0.24693338897511996	11.857157142178805 -1.0097209109298957	12.936779969121048 1.5001578408544505E9	11.857157142178805 8.259874763484055E13	11.857157142178805 -0.009905306177972029	20.654185488660207 1.5000123987788486E9
12.943587677268727 0.24897473814153503	11.869683580515066 -1.009929973382861	12.943587677268727 1.5001618978141005E9	11.869683580515066 8.344765977051838E13	11.869683580515066 -0.009893739037828309	20.663544469084368 1.5000116585887594E9
12.952762080407805 0.2518236955295263	11.882357616895002 -1.0100745611669035	12.952762080407805 1.5001676928143783E9	11.882357616895002 8.406710122416436E13	11.882357616895002 -0.009881644963991132	20.67336752253643 1.5000109059236948E9
12.961939535001347 0.2546817125658434	11.895189653815565 -1.010154674282016	12.961939535001347 1.5001736965398133E9	11.895189653815565 8.445707199577847E13	11.895189653815565 -0.009869023956459833	20.683190173245993 1.5000101785393527E9
12.971122312826953 0.25754878925048974	11.908422103991729 -1.0101592376186916	12.971122312826953 1.5001799089904053E9	11.908422103991729 8.457327591084612E13	11.908422103991729 -0.009855541392541078	20.693012467193775 1.5000094764357326E9
12.980312681714654 0.2604249255834601	11.921560408083304 -1.0100842319369923	12.980312681714654 1.5001863301661541E9	11.921560408083304 8.439946396942045E13	11.921560408083304 -0.009841574706750289	20.702834450365515 1.5000087996128347E9
12.990129062154054 0.2634838831255424	11.934611892622927 -1.0099296572369019	12.990129062154054 1.5001933879440577E9	11.934611892622927 8.393563617150145E13	11.934611892622927 -0.00982712389908691	20.713143440479822 1.5000081167714047E9
12.999943380473303 0.26652381851834317	11.946223048336362 -1.0097167362180341	12.999943380473303 1.5002006554237945E9	11.946223048336362 8.325036494850648E13	11.946223048336362 -0.009813675741766503	20.723452012880063 1.5000074626688085E9
13.00975841084838 0.2695447317618642	11.957549793347589 -1.0094356490203564	13.00975841084838 1.5002081326053643E9	11.957549793347589 8.232531392355136E13	11.957549793347589 -0.009799905751856297	20.73376022062391 1.5000068373050454E9
13.019576926851702 0.27254662285610376	11.968596601101812 -1.0090863956438598	13.019576926851702 1.5002158194887676E9	11.968596601101812 8.116048309663605E13	11.968596601101812 -0.009785813929355736	20.74406811677467 1.500006240680116E9
13.031290843974286 0.27609676427692786	11.97821730150753 -1.0087130052867854	13.031290843974286 1.500225271230926E9	11.97821730150753 7.991288150501095E13	11.97821730150753 -0.009772878204415192	20.7548870773894 1.500005645858386E9
13.04299243601955 0.2795955945935935	11.987452916201399 -1.008287111386493	13.04299243601955 1.500234997586566E9	11.987452916201399 7.849820298488997E13	11.987452916201399 -0.009759757314907636	20.765705607052865 1.5000050837009313E9
13.054686395393626 0.2830431138061025	11.996307002380032 -1.0078087139429703	13.054686395393626 1.5002449985556877E9	11.996307002380032 7.691644753627308E13	11.996307002380032 -0.00974645126083229	20.77652376698831 1.5000045542077518E9
13.066377423693185 0.28643932191445654	12.00431476217761 -1.0073044544393026	13.066377423693185 1.5002552741382911E9	12.00431476217761 7.526683805196597E13	12.00431476217761 -0.009733608031527119	20.787341618425266 1.5000040573788471E9
13.07847485887575 0.2898556134141872	12.011844678283454 -1.0067548751554325	13.07847485887575 1.5002660581137488E9	12.011844678283454 7.349568301632719E13	12.011844678283454 -0.009720592610645618	20.798695768648077 1.5000035716075234E9
13.090571287973308 0.29322876623771865	12.018901226670902 -1.0061599760913493	13.090571287973308 1.5002771932248466E9	12.018901226670902 7.160298242935669E13	12.018901226670902 -0.009707404998186897	20.810049476983075 1.5000031227796788E9
13.102682155329493 0.29655878038504735	12.025172349371806 -1.0055378688900989	13.102682155329493 1.5002886794715846E9	12.025172349371806 6.965697585229357E13	12.025172349371806 -0.009694419358745265	20.82140281407572 1.5000027108953133E9
13.114822850186739 0.29984565585618217	12.031187229647383 -1.0048737018281484	13.114822850186739 1.5003005168539622E9	12.031187229647383 6.7628012657562625E13	12.031187229647383 -0.009681221063617795	20.832755850578412 1.5000023359544265E9
13.126171032909808 0.30289406388754525	12.036983245779416 -1.0041674749054943	13.126171032909808 1.5003119694764297E9	12.036983245779416 6.551609284516382E13	12.036983245779416 -0.009667810112804154	20.84467165243753 1.50000198271095E9
13.137493147331787 0.3059099695280034	12.042394121419512 -1.0034447689934707	13.137493147331787 1.5003237945994058E9	12.042394121419512 6.341171269175954E13	12.042394121419512 -0.009654681278364219	20.856587004446766 1.5000016708481486E9
13.14880176545183 0.3088933727775496	12.047683687327293 -1.0026893811912734	13.14880176545183 1.50033599222289E9	12.047683687327293 6.127902315612621E13	12.047683687327293 -0.009641420579973192	20.868501988124663 1.5000014003660228E9
13.160109504284943 0.31184427363618905	12.052886203610337 -1.0019013114989006	13.160109504284943 1.5003485623468823E9	12.052886203610337 5.911802423826382E13	12.052886203610337 -0.009628028017631074	20.880416684997318 1.5000011712645726E9
13.170126060658266 0.3143951631175801	12.058361368710054 -1.0010265611699571	13.170126060658266 1.5003598238317678E9	12.058361368710054 5.680175127533753E13	12.058361368710054 -0.00961365372764822	20.892921903829098 1.5000009757245095E9
13.180164191287865 0.31696221237516564	12.0638110502371 -1.000120171818371	13.180164191287865 1.5003716260499508E9	12.0638110502371 5.449594037347685E13	12.0638110502371 -0.00959915383801313	20.90542666862511 1.5000008259140632E9
13.190247552461184 0.31954542140895104	12.069270148343056 -0.999182143444135	13.190247552461184 1.5003839690014315E9	12.069270148343056 5.2200591532681766E13	12.069270148343056 -0.009584528348726251	20.917931073452532 1.5000007218332336E9
13.20039948427853 0.3221447902189256	12.075539814087616 -0.9980824761093663	13.20039948427853 1.5003968526862094E9	12.075539814087616 4.963278066817375E13	12.075539814087616 -0.009567838181857358	20.930435212386666 1.5000006634820206E9
13.209616413675212 0.3245303125950203	12.081880274362716 -0.9969524161679404	13.209616413675212 1.5004090553620954E9	12.081880274362716 4.712683773654885E13	12.081880274362716 -0.00955105697891756	20.943558990130104 1.500000651551508E9
13.218815387843623 0.3269685731357024	12.08832701116193 -0.9957919636198591	13.218815387843623 1.5004220984089553E9	12.08832701116193 4.4682762737807055E13	12.08832701116193 -0.009534184739906526	20.956682314382295 1.5000006893786795E9
13.228014362012035 0.32945957184097363	12.095822660111939 -0.9944523220292885	13.228014362012035 1.5004359818267894E9	12.095822660111939 4.202900159537929E13	12.095822660111939 -0.009515115762730897	20.969805293694964 1.5000007769635358E9
13.237231291408717 0.3320033087108252	12.103470377803893 -0.9930947611096217	13.237231291408717 1.5004507056155975E9	12.103470377803893 3.950193803130172E13	12.103470377803893 -0.009496112392681999	20.982928036628394 1.5000009143060765E9
13.247383223226063 0.33488740401346195	12.111299581060187 -0.9917192808608606	13.247383223226063 1.5004678515080388E9	12.111299581060187 3.7101572045574336E13	12.111299581060187 -0.009477174629759721	20.996700974825465 1.5000011117046082E9
13.257466584399383 0.3379447503739703	12.120357754416988 -0.9901748433230617	13.257466584399383 1.5004872737424023E9	12.120357754416988 3.459946822419829E13	12.120357754416988 -0.009456238615750068	21.010473465944727 1.5000013624351597E9
13.267504715028984 0.3411753477923556	12.129586327650344 -0.9886423647113469	13.267504715028984 1.5005089723186884E9	12.129586327650344 3.228248300535393E13	12.129586327650344 -0.009435710082719484	21.02424563526045 1.5000016664977314E9
13.277521271402309 0.3445791962686142	12.139005299477985 -0.9871218450257109	13.277521271402309 1.5005329472368968E9	12.139005299477985 3.0150616389041246E13	12.139005299477985 -0.009415589030668081	21.038017608055682 1.500002023892323E9
13.287074585769686 0.3483265533122948	12.150058054987639 -0.9854239096154229	13.287074585769686 1.5005604826182227E9	12.150058054987639 2.79617843988333E13	12.150058054987639 -0.009393370177231741	21.052471818677354 1.5000024556497467E9
13.29664734413523 0.35233351558561754	12.161192011728364 -0.9837901161494473	13.29664734413523 1.5005927296883688E9	12.161192011728364 2.600191826243442E13	12.161192011728364 -0.009372169062180524	21.066925595869975 1.5000029438756876E9
13.30625454255248 0.3566000830885807	12.172418765844958 -0.9822204646277823	13.30625454255248 1.5006296884473352E9	12.172418765844958 2.4271017979844594E13	12.172418765844958 -0.009351985685514319	21.081379084218206 1.5000034885701458E9
13.31591101662493 0.36112625582118607	12.186091710685709 -0.9804432817196309	13.31591101662493 1.5006713588951218E9	12.186091710685709 2.2479480308332684E13	12.186091710685709 -0.009329324789576487	21.095832428315372 1.5000040897331214E9
13.32669908350561 0.3664070131181303	12.199519276371598 -0.9788121445816662	13.32669908350561 1.5007237372086203E9	12.199519276371598 2.0948939467949195E13	12.199519276371598 -0.00930866266727215	21.111001605587237 1.500004780291663E9
13.337469295205674 0.37182612712076146	12.212705451073376 -0.9773270532138865	13.337469295205674 1.5007840585555937E9	12.212705451073376 1.9679395458694133E13	12.212705451073376 -0.009289999318601194	21.126170371959326 1.5000055301693308E9
13.348242808069003 0.3773835978290814	12.228405977775926 -0.9757376309245407	13.348242808069003 1.500852322936042E9	12.228405977775926 1.8433576208874266E13	12.228405977775926 -0.009270189997112599	21.141338894320548 1.5000063393661253E9
13.359040759035661 0.38307942524308647	12.242947365038434 -0.9743829118733691	13.359040759035661 1.5009285303499658E9	12.242947365038434 1.7439226327370479E13	12.242947365038434 -0.009253411350916396	21.156507339567863 1.5000072078820465E9
13.370395128504097 0.38913366648967607	12.256331928150656 -0.9732628960603593	13.370395128504097 1.5010188371103108E9	12.256331928150656 1.669634581418277E13	12.256331928150656 -0.009239663380012031	21.172426836732445 1.500008181736698E9
13.381681528226279 0.39513330938932345	12.270321042179251 -0.9722256477289806	13.381681528226279 1.5011200223217468E9	12.270321042179251 1.6054069336126605E13	12.270321042179251 -0.009227061179004847	21.188345956398724 1.5000092177682614E9
13.392924003971837 0.40107835394202507	12.283702309708932 -0.9713055520221436	13.392924003971837 1.5012320859842744E9	12.283702309708932 1.551885244483123E13	12.283702309708932 -0.009215952190878451	21.204264891225442 1.5000103159767365E9
13.404146883844108 0.40696880014777737	12.29655887896517 -0.9705026089398379	13.404146883844108 1.5013550280978932E9	12.29655887896517 1.5090695140296645E13	12.29655887896517 -0.00920633641563251	21.22018383387805 1.5000114763621233E9
13.415567699032158 0.4127313354714195	12.30868181463471 -0.969775265304194	13.415567699032158 1.5014900876209006E9	12.30868181463471 1.4713404889828754E13	12.30868181463471 -0.00919764161715697	21.236890743904798 1.5000127593418741E9
13.42699218812008 0.4183599658951076	12.32051162261979 -0.9690828549284207	13.42699218812008 1.5016381567980998E9	12.32051162261979 1.436547407360162E13	12.32051162261979 -0.009189363669717343	21.253597323133366 1.5000141079497159E9
13.438424196539039 0.42385469141884524	12.332125139916855 -0.9684253778125038	13.438424196539039 1.5017992356294906E9	12.332125139916855 1.4046902691615232E13	12.332125139916855 -0.00918150257331285	21.270303794006608 1.500015522185648E9
13.449867562139806 0.4292155120426271	12.344748385919265 -0.96771286780577	13.449867562139806 1.5019733241150727E9	12.344748385919265 1.3702846821223785E13	12.344748385919265 -0.009172947698642742	21.287010378971708 1.5000170020496707E9
13.461267498071605 0.4344162425538327	12.357300037128425 -0.9669971695020285	13.461267498071605 1.5021619684490287E9	12.357300037128425 1.336142159651047E13	12.357300037128425 -0.009164321106809425	21.30454361968253 1.5000186240326097E9
13.472663466591955 0.4394600900491161	12.369861093412252 -0.9662782829012846	13.472663466591955 1.5023650813854618E9	12.369861093412252 1.302262701747529E13	12.369861093412252 -0.00915562279781279	21.322076592570607 1.5000203167111883E9
13.484059276713515 0.4443470545284791	12.384587666800282 -0.9654089802300012	13.484059276713515 1.502582662924372E9	12.384587666800282 1.2610153151630496E13	12.384587666800282 -0.009145041372186413	21.339609554516272 1.5000220800854063E9
13.495458737607718 0.4490771359919199	12.39946651815189 -0.964491878532935	13.495458737607718 1.5028147130657592E9	12.39946651815189 1.218075197575425E13	12.39946651815189 -0.009133831020184169	21.357142762400343 1.5000239141552641E9
13.506427405736165 0.4534583028145063	12.414574304780324 -0.9635269778100861	13.506427405736165 1.503052547961906E9	12.414574304780324 1.1734423489846545E13	12.414574304780324 -0.009121991741806279	21.37542569655011 1.5000259007962418E9
13.51738563827185 0.4576547119946399	12.432266339414937 -0.9623262799317969	13.51738563827185 1.503300570532312E9	12.432266339414937 1.11831836851568E13	12.432266339414937 -0.0091072086842382	21.393708449631237 1.5000279649738781E9
13.528336815460511 0.46166636353232615	12.450244701952704 -0.9610208620643652	13.528336815460511 1.5035587807769768E9	12.450244701952704 1.0606588162332957E13	12.450244701952704 -0.009091113095379355	21.41199131271423 1.5000301066881733E9
13.53928432408329 0.4654932574275632	12.468559936543265 -0.9596107242077805	13.53928432408329 1.5038271786959004E9	12.468559936543265 1.0004636921375008E13	12.468559936543265 -0.009073704975228747	21.430274576864324 1.5000323259391274E9
13.553263410963789 0.470012754564741	12.490059520722768 -0.9578139309037033	13.553263410963789 1.5041741103757992E9	12.490059520722768 9.269072044154957E12	12.490059520722768 -0.009051527145560234	21.448437691418654 1.5000346072589169E9
13.567245402848167 0.4743244187963631	12.511737772323213 -0.955841576726038	13.567245402848167 1.5045361934411802E9	12.511737772323213 8.523361353310509E12	12.511737772323213 -0.00902721779429283	21.466600750882257 1.5000369683079271E9
13.581233078630872 0.4784282501224295	12.533614409628358 -0.9536936616747758	13.581233078630872 1.5049134278920436E9	12.533614409628358 7.767504848841662E12	12.533614409628358 -0.00900077692142598	21.484764040533303 1.5000394090861588E9
13.595229213820783 0.4823242485429402	12.55787749044844 -0.951053678617158	13.595229213820783 1.5053058137283888E9	12.55787749044844 6.916565331117504E12	12.55787749044844 -0.008968366494714775	21.502927845639118 1.5000419295936115E9
13.608844363534034 0.4859876326451884	12.58183942811219 -0.9481482467457107	13.608844363534034 1.5057043269235587E9	12.58183942811219 6.094807658825446E12	12.58183942811219 -0.008932815832622287	21.520790634454073 1.5000444870406225E9
13.622457141780588 0.48955061873615957	12.605500293746722 -0.9449773660604288	13.622457141780588 1.506124079569992E9	12.605500293746722 5.302231831965486E12	12.605500293746722 -0.008894124935148295	21.538653490701726 1.5000471279311566E9
13.636070110031275 0.4930132068158537	12.627870707896506 -0.9415258797834243	13.636070110031275 1.5065650716676884E9	12.627870707896506 4.540531392704944E12	12.627870707896506 -0.00885217110591574	21.556516685718464 1.500049852265214E9
13.649685829649687 0.49637539688427434	12.649421586821212 -0.9371450133346064	13.649685829649687 1.5070273032166479E9	12.649421586821212 3.7524633498284336E12	12.649421586821212 -0.008799185639022489	21.574380490825238 1.5000526600427947E9
13.664692864113407 0.500003488389571	12.670177725963324 -0.9318347667139575	13.664692864113407 1.5075640545067682E9	12.670177725963324 2.9380277033359517E12	12.670177725963324 -0.00873516853446843	21.591947924752688 1.500055505278015E9
13.679690174127234 0.5035678780290214	12.689630174791747 -0.9265487695394752	13.679690174127234 1.5081370284425044E9	12.689630174791747 2.350035491321332E12	12.689630174791747 -0.008671898305342096	21.6095155391 1.5000584425407617E9
13.694681180594246 0.5070685658026326	12.707683190696411 -0.9221946151324092	13.694681180594246 1.5087462250238562E9	12.707683190696411 1.9274659196883806E12	12.707683190696411 -0.008619971549413297	21.627083592014916 1.5000614718310347E9
13.709669308733709 0.5105055517103976	12.724337841709525 -0.9187723034927524	13.709669308733709 1.509391644250824E9	12.724337841709525 1.6703189884370962E12	12.724337841709525 -0.008579388266681476	21.644652341625854 1.5000645931488342E9
13.724179139173943 0.5138059133026607	12.742204616115616 -0.9150622602141132	13.724179139173943 1.5100596787223635E9	12.742204616115616 1.4183150684390774E12	12.742204616115616 -0.008535540016951781	21.661929308523273 1.500067757772737E9
13.738690801475796 0.5170663852138402	12.758592985381634 -0.9114842604003774	13.738690801475796 1.5107723456751251E9	12.758592985381634 1.2102636684430857E12	12.758592985381634 -0.008493368877653396	21.67920656038812 1.5000710292645397E9
13.75320601972695 0.5202869674439325	12.773502970191524 -0.908038304051531	13.75320601972695 1.5115296451091092E9	12.773502970191524 1.0461647884491211E12	12.773502970191524 -0.008452874848786096	21.69648434288517 1.5000744076242423E9
13.767726516748441 0.5234676599929413	12.788632997509698 -0.9041912308247815	13.767726516748441 1.5123315770243154E9	12.788632997509698 8.844169689150646E11	12.788632997509698 -0.00840776650280417	21.713762901656562 1.5000778928518445E9
13.779650444971118 0.5260463220088658	12.802537356390363 -0.9002638645352201	13.779650444971118 1.5130274603105025E9	12.802537356390363 7.451779386733041E11	12.802537356390363 -0.008361808293424589	21.730754210967234 1.5000814329509883E9
13.79157369805546 0.5285826757576695	12.815222109719242 -0.8962562051828362	13.79157369805546 1.5137522181466236E9	12.815222109719242 6.284476977238391E11	12.815222109719242 -0.008315000220646795	21.74774590229798 1.5000851006858523E9
13.803497231624991 0.5310767212393541	12.828558591999355 -0.8914023992777436	13.803497231624991 1.5145058505326786E9	12.828558591999355 5.096583201322568E11	12.828558591999355 -0.00825839987169863	21.764738209492243 1.5000888960564363E9
13.815422001235802 0.5335284584539233	12.8412769673172 -0.8861497886459881	13.815422001235802 1.5152883574686677E9	12.8412769673172 4.0706020515405945E11	12.8412769673172 -0.008197250257019117	21.781731366368057 1.50009281906274E9
13.825247070683815 0.5355084965012091	12.85343301712617 -0.8804983732875664	13.825247070683815 1.5159540396898932E9	12.85343301712617 3.20653352789247E11	12.85343301712617 -0.00813155137660826	21.798441753829035 1.5000968125824018E9
13.83507061323109 0.5374377609000147	12.864817964169148 -0.8745877223634286	13.83507061323109 1.516629070683193E9	12.864817964169148 2.4988535510053247E11	12.864817964169148 -0.008062934551837486	21.815152613679416 1.5001009594810922E9
13.844893163113992 0.5393162516503365	12.87669769028627 -0.8680146591624842	13.844893163113992 1.517313450448567E9	12.87669769028627 1.8995829225945013E11	12.87669769028627 -0.007986749725023334	21.8318641685622 1.5001052597588115E9
13.85471525473086 0.5411439687521797	12.889138401032506 -0.8607791836847172	13.85471525473086 1.518007178986015E9	12.889138401032506 1.408721642659999E11	12.889138401032506 -0.007902996896164916	21.848576641092603 1.5001097134155595E9
13.86290806915704 0.542619466385827	12.900592926982243 -0.8540303371268694	13.86290806915704 1.518587432973987E9	12.900592926982243 1.0730355358253853E11	12.900592926982243 -0.007825003229222527	21.865010766061662 1.5001142562047567E9
13.871099202316755 0.5440287997299835	12.913095551659831 -0.8468566347417132	13.871099202316755 1.519153997968742E9	12.913095551659831 8.018874717437201E10	12.913095551659831 -0.007742239079923664	21.881445447801298 1.5001189840353932E9
13.879288963857293 0.545371968784651	12.926666894619599 -0.8392580765292399	13.879288963857293 1.5197068739702792E9	12.926666894619599 5.952774504150031E10	12.926666894619599 -0.007654704448267658	21.897880898336847 1.5001238969074686E9
13.887477663581546 0.5466489735498312	12.939174088221145 -0.8327360108585831	13.887477663581546 1.5202460609785993E9	12.939174088221145 4.635380037755852E10	12.939174088221145 -0.007579712509214632	21.9143173296639 1.5001289948209832E9
13.894618310971993 0.547651475837589	12.952800755922466 -0.826365381882602	13.894618310971993 1.5206694370611372E9	12.952800755922466 3.611726122778282E10	12.952800755922466 -0.007506594605063422	21.930479750165155 1.5001342053562653E9
13.90175603802643 0.5486177269938812	12.967550809820967 -0.8201461896012843	13.90175603802643 1.5210809202959878E9	12.967550809820967 2.8818127592173206E10	12.967550809820967 -0.007435350735813807	21.9466428064219 1.5001396421170635E9
13.908916056087014 0.5495477270187079	12.981451478373984 -0.8151532111430422	13.908916056087014 1.521480510683151E9	12.981451478373984 2.4034775731163773E10	12.981451478373984 -0.007378292537848608	21.962806700388224 1.5001453051033778E9
13.916123342575515 0.5504414759120655	12.996428279127224 -0.811284783592467	13.916123342575515 1.521868208222627E9	12.996428279127224 2.079819647117486E10	12.996428279127224 -0.0073342775439467775	21.97897163398683 1.5001511943152084E9
13.922491316359793 0.5512186192090445	13.012481823217943 -0.8085409069495535	13.922491316359793 1.522207289452763E9	13.012481823217943 1.910838981220645E10	13.012481823217943 -0.007303305754108314	21.994866832903956 1.5001572284872868E9
13.928822337228928 0.5519844992872782	13.028551832964213 -0.8059980016242401	13.928822337228928 1.5225448025906487E9	13.028551832964213 1.7393056386913307E10	13.028551832964213 -0.007274591854457669	22.01076274166972 1.5001635439256644E9
13.935133659315884 0.5527391161467703	13.044634904166996 -0.8022206672389958	13.935133659315884 1.5228807476362836E9	13.044634904166996 1.5327565927030796E10	13.044634904166996 -0.007231664996660837	22.02665955268055 1.5001701406303408E9
13.94144269837401 0.55348246978751	13.060750370903579 -0.7972089037938117	13.94144269837401 1.523215124589668E9	13.060750370903579 1.2911918432558907E10	13.060750370903579 -0.0071745251807173735	22.042557458300113 1.5001770186013162E9
13.946480532181525 0.5540711629161352	13.07636957049577 -0.7917471305857324	13.946480532181525 1.5234812536729746E9	13.07636957049577 1.0817393228755426E10	13.07636957049577 -0.007112253642424294	22.0581898504106 1.5001840857128816E9
13.9515291480738 0.5546656796915768	13.091973796591567 -0.785835698462173	13.9515291480738 1.523753443859352E9	13.091973796591567 8.978955883192535E9	13.091973796591567 -0.007044909064304662	22.073823021999985 1.5001915055579615E9
13.95660036848907 0.5552660201138329	13.107566599717522 -0.7794746074231336	13.95660036848907 1.5240316951488008E9	13.107566599717522 7.3966063958702345E9	13.107566599717522 -0.006972491446358365	22.08945715639026 1.5001992781365564E9
13.961705858836702 0.5558721841829017	13.12416979203765 -0.7722800201932243	13.961705858836702 1.524316007541321E9	13.12416979203765 6.050334523026649E9	13.12416979203765 -0.006890684394647018	22.10509243686955 1.500207403448666E9
13.966341327548706 0.5564289230804613	13.14067172367631 -0.76486328817023	13.966341327548706 1.5245801574045105E9	13.14067172367631 4.964071170147481E9	13.14067172367631 -0.006806477280059898	22.12046637112107 1.5002157746846986E9
13.970967822614305 0.5569974635018964	13.157072613320391 -0.75722441135414	13.970967822614305 1.524855084478287E9	13.157072613320391 4.1378163372327285E9	13.157072613320391 -0.006719870102596449	22.13584115038245 1.500224588168799E9
13.975594317679906 0.5575778054472069	13.175331447340392 -0.7484166009642932	13.975594317679906 1.5251407887626503E9	13.175331447340392 3.4416621151818953E9	13.175331447340392 -0.006620190995636822	22.15121694935632 1.5002338439009671E9
13.980229786391911 0.5581699489163894	13.193354558172388 -0.7396113393229937	13.980229786391911 1.5254372702576003E9	13.193354558172388 2.9139135854636016E9	13.193354558172388 -0.006520726911160014	22.166593942710552 1.5002435418812037E9
13.985335276739542 0.5588391569749129	13.211158316156505 -0.7308086264302274	13.985335276739542 1.525777332383232E9	13.211158316156505 2.554570748077846E9	13.211158316156505 -0.006421477849165692	22.1817137040994 1.500253555839029E9
13.990406497154815 0.5595402002479917	13.229215942944673 -0.721782581442926	13.990406497154815 1.526145803208131E9	13.229215942944673 2.27742062182643E9	13.229215942944673 -0.006319924097835884	22.19683437223749 1.5002641221962466E9
13.995455113047091 0.5602730787356291	13.247035435836702 -0.713007135616702	13.995455113047091 1.5265426827322972E9	13.247035435836702 2.0725265282461355E9	13.247035435836702 -0.006221379090028623	22.21195611363695 1.5002752409528565E9
14.000492946854608 0.56103779243782	13.264689283937711 -0.7044822889515432	14.000492946854608 1.5269679709557307E9	13.264689283937711 1.9398884673369617E9	13.264689283937711 -0.006125842825743689	22.227079094774474 1.5002869121088588E9
14.006407078508708 0.5620339842944668	13.279590418010436 -0.6974755776619928	14.006407078508708 1.527540331627153E9	13.279590418010436 1.8483417461164994E9	13.279590418010436 -0.006047475723118368	22.24194890600003 1.50029898460546E9
14.01232186671209 0.5630959669822042	13.294529080049093 -0.6907381057805493	14.01232186671209 1.5281785013362286E9	13.294529080049093 1.778132934948217E9	13.294529080049093 -0.0059722469513421314	22.256819682182662 1.5003117440613327E9
14.01823740021974 0.5642237405010304	13.30959939836449 -0.6842698733072075	14.01823740021974 1.5288824800829577E9	13.30959939836449 1.7292620338321145E9	13.30959939836449 -0.005900156510414646	22.271691582048533 1.5003251904764767E9
14.024153767753097 0.565417304850949	13.323319102527094 -0.6787041694080953	14.024153767753097 1.52965226786734E9	13.323319102527094 1.6917567090894258E9	13.323319102527094 -0.0058382462856679815	22.28656476428782 1.5003393238508923E9
14.031247091107044 0.5669222900758824	13.337381710053325 -0.6733317981871219	14.031247091107044 1.530647360561721E9	13.337381710053325 1.661535859568533E9	13.337381710053325 -0.005778595894866957	22.301188771130004 1.5003539614937587E9
14.038341052462517 0.5685053178367658	13.351879513540268 -0.668152759644296	14.038341052462517 1.531755686715293E9	13.351879513540268 1.6385994852694352E9	13.351879513540268 -0.005721205338011793	22.315813797823086 1.5003694497136543E9
14.045435804937286 0.5701663881336048	13.365769241473977 -0.6635287378703802	14.045435804937286 1.5329772463280554E9	13.365769241473977 1.6201476715131552E9	13.365769241473977 -0.005670083250815195	22.33043999568857 1.500385788510579E9
14.05253150159791 0.5719055009663938	13.380277635543633 -0.6589688349897314	14.05253150159791 1.534312039400009E9	13.380277635543633 1.6044795509250839E9	13.380277635543633 -0.005619786248873938	22.34506751601161 1.500402977884533E9
14.061039993155157 0.5740884144898706	13.395477597291059 -0.6544730510023511	14.061039993155157 1.5360392132914398E9	13.395477597291059 1.5915951235052216E9	13.395477597291059 -0.005570314332187799	22.359449764304202 1.500420794752471E9
14.069548874053037 0.5763756379254934	13.408402186118783 -0.6508365456586107	14.069548874053037 1.538003282919351E9	13.408402186118783 1.5821274185344288E9	13.408402186118783 -0.005530407740011346	22.373833084206783 1.50043966124757E9
14.078058408493103 0.5787671712732605	13.421934135426971 -0.6471069743287154	14.078058408493103 1.5402042482837434E9	13.421934135426971 1.5735301842454045E9	13.421934135426971 -0.005489585598586034	22.388217619995213 1.50045957736983E9
14.086568860616044 0.5812630145331701	13.436106312040415 -0.6432843370126546	14.086568860616044 1.5426421093846161E9	13.436106312040415 1.5658034206381485E9	13.436106312040415 -0.005447847907911197	22.40260351590877 1.5004805431192508E9
14.09677576769928 0.5843881672664386	13.447973030746299 -0.6400602619082312	14.09677576769928 1.5458268086438131E9	13.447973030746299 1.5599251205431254E9	13.447973030746299 -0.005412743960128586	22.416747986562317 1.50050228225364E9
14.106982323100665 0.5876492185785951	13.459089137687904 -0.636975902735414	14.106982323100665 1.5495651940211544E9	13.459089137687904 1.5547851976032686E9	13.459089137687904 -0.005379230341886699	22.430893577604333 1.5005253158213708E9
14.117188982725649 0.5910461684696413	13.469481004460018 -0.6340312594941926	14.117188982725649 1.55385726551664E9	13.469481004460018 1.5503836518185775E9	13.469481004460018 -0.00534730705318487	22.445040426604297 1.500549643822443E9
14.127396202465713 0.5945790169395755	13.479190095420858 -0.6311701676695476	14.127396202465713 1.55870302313027E9	13.479190095420858 1.5464307529933414E9	13.479190095420858 -0.005316351262215747	22.459188671094985 1.500575266256857E9
14.139419866168048 0.5989013289707659	13.488322009620274 -0.6283704643328578	14.139419866168048 1.5650597322900407E9	13.488322009620274 1.5428701355294273E9	13.488322009620274 -0.005286109802700834	22.473504847982046 1.5006026228277736E9
14.151441552316527 0.6033705832750025	13.496915204949719 -0.6256321494841055	14.151441552316527 1.5727700505756724E9	13.496915204949719 1.5397017994268346E9	13.496915204949719 -0.005256582674639799	22.487822257400428 1.5006316784185586E9
14.163462005632729 0.6079867798522818	13.504823851136692 -0.6230027498591708	14.163462005632729 1.581833977987165E9	13.504823851136692 1.5368784780939622E9	13.504823851136692 -0.0052282736945477035	22.502141042353387 1.500662433029212E9
14.175481971067379 0.6127499187026002	13.512368841233128 -0.620414582088519	14.175481971067379 1.5922515145245183E9	13.512368841233128 1.534300943402229E9	13.512368841233128 -0.005200442953535612	22.516461345802973 1.5006948866597338E9
14.18731704190317 0.6175524186718837	13.519596117369074 -0.6178676461721517	14.18731704190317 1.6039634238635688E9	13.519596117369074 1.531969195351635E9	13.519596117369074 -0.0051730904516034135	22.53161406831696 1.5007312048841746E9
14.199148776881051 0.6224284229180865	13.52638014392527 -0.6154273082126425	14.199148776881051 1.6180875122491174E9	13.52638014392527 1.5298881145737786E9	13.52638014392527 -0.005146914531193981	22.546768266387552 1.5007699937414067E9
14.210977885720357 0.6273779314412087	13.532996212001358 -0.6130301955043231	14.210977885720357 1.6346237796811635E9	13.532996212001358 1.5279782050213406E9	13.532996212001358 -0.005121227400557316	22.561924110050466 1.50081125323143E9
14.222805078613185 0.6324009442412502	13.53948864948222 -0.6106763080471884	14.222805078613185 1.653572226159708E9	13.53948864948222 1.5262394666943202E9	13.53948864948222 -0.005096029059693642	22.57708176928603 1.500854983354245E9
14.235813223606119 0.6379462799879638	13.546442247529392 -0.6081931478646618	14.235813223606119 1.6772796436590517E9	13.546442247529392 1.5245303342518613E9	13.546442247529392 -0.0050694767766419355	22.59312826293205 1.500904153189786E9
14.248823558044805 0.6435052451359473	13.553379106092686 -0.6057709591161045	14.248823558044805 1.7062130126624818E9	13.553379106092686 1.5229702678999102E9	13.553379106092686 -0.005043603202910863	22.60917652869202 1.5009569968753703E9
14.261838810370824 0.6490778396852006	13.560344532379643 -0.6034097418015181	14.261838810370824 1.7403723331699984E9	13.560344532379643 1.5215592676384664E9	13.560344532379643 -0.005018408338500314	22.625226769117553 1.5010135144109979E9
14.274861705934697 0.6546640636357326	13.568469715821532 -0.600807852358451	14.274861705934697 1.7797576051816015E9	13.568469715821532 1.5201142743983488E9	13.568469715821532 -0.004990683004733266	22.641279186685516 1.5010737057966685E9
14.287325272684605 0.6599948804219045	13.576742783331927 -0.5983034600161217	14.287325272684605 1.8234173747839704E9	13.576742783331927 1.51881306742383E9	13.576742783331927 -0.004964033611712494	22.658272143475283 1.5011417035875802E9
14.29978605784873 0.6652951948353989	13.585204251972772 -0.5958965647745247	14.29978605784873 1.8757220215774155E9	13.585204251972772 1.5176556467149093E9	13.585204251972772 -0.004938460159437775	22.675267233471047 1.5012152997118433E9
14.312246455542592 0.6705650068762194	13.59495810016995 -0.5933667555224433	14.312246455542592 1.9366715455619373E9	13.59495810016995 1.5165229691221454E9	13.59495810016995 -0.0049116343714109565	22.692264698030954 1.5012944941694572E9
14.324708860105025 0.6758043165443661	13.60498878494036 -0.5909691568894404	14.324708860105025 2.006265946737536E9	13.60498878494036 1.5155145568467042E9	13.60498878494036 -0.0048862638682493085	22.709264778412013 1.501379286960422E9
14.335713288079743 0.6803975652257099	13.615319128385112 -0.5887037688755088	14.335713288079743 2.0766659161845942E9	13.615319128385112 1.5146304098885853E9	13.615319128385112 -0.00486234864995272	22.72725999669626 1.5014755682577517E9
14.346712257220117 0.6849909258862157	13.627158602874268 -0.5863833338645259	14.346712257220117 2.1597410219099607E9	13.627158602874268 1.5137813238737185E9	13.627158602874268 -0.0048379322275550205	22.745257789073765 1.501580603680857E9
14.357707412409262 0.6895843985258798	13.639315353767849 -0.5842214405449146	14.357707412409262 2.255491263913636E9	13.639315353767849 1.5130333995543625E9	13.639315353767849 -0.0048152643031863515	22.76325844323616 1.5016943932297375E9
14.368700400242341 0.694177983144713	13.651795820956647 -0.5822180889166679	14.368700400242341 2.3639166421956205E9	13.651795820956647 1.5123866369305162E9	13.651795820956647 -0.00479434487684638	22.78126224673789 1.5018169369043934E9
14.378126260093747 0.698231946277871	13.664947996706603 -0.5803391162185365	14.378126260093747 2.473497314520506E9	13.664947996706603 1.5118106554949784E9	13.664947996706603 -0.004774833063990292	22.800318723728154 1.5019568429465883E9
14.387555157509162 0.7022858500607638	13.67832918553088 -0.5786091674718117	14.387555157509162 2.6004280288339424E9	13.67832918553088 1.511304470149103E9	13.67832918553088 -0.004756976898775079	22.81937831461633 1.5021108075198884E9
14.39699091824417 0.7063396944933933	13.69193941651419 -0.577028242676481	14.39699091824417 2.7447087851359296E9	13.69193941651419 1.5108680808928893E9	13.69193941651419 -0.0047407763811999635	22.838441362432853 1.5022788306242945E9
14.406437359715538 0.7103934795757629	13.704148531898715 -0.5757518996435502	14.406437359715538 2.9063395834264684E9	13.704148531898715 1.5105282109476771E9	13.704148531898715 -0.004727813444539986	22.85750821002158 1.5024609122598064E9
14.414260880905957 0.7137285397878435	13.716452462669453 -0.5745729946533595	14.414260880905957 3.056220250230295E9	13.716452462669453 1.5102252206037772E9	13.716452462669453 -0.004715949047411684	22.877688371457037 1.502669968266828E9
14.42208213212005 0.7170431005783398	13.72885600664703 -0.573491527705893	14.42208213212005 3.224286207190774E9	13.72885600664703 1.5099591098611884E9	13.72885600664703 -0.004705183189814389	22.897872309565397 1.5029022377465768E9
14.429903291795629 0.7203371619472536	13.73897817538612 -0.5726820600649942	14.429903291795629 3.4105374543079042E9	13.73897817538612 1.5097649107207882E9	13.73897817538612 -0.004697226422720303	22.918060433495643 1.503157720699053E9
14.43772653844697 0.7236107238945833	13.749134984669157 -0.571925354158199	14.43772653844697 3.6149739915816865E9	13.749134984669157 1.509588223717463E9	13.749134984669157 -0.00468987786424302	22.938253152142313 1.5034364171242568E9
14.446843699284482 0.7274004325882766	13.759334666361081 -0.5712214099855109	14.446843699284482 3.8768916666529527E9	13.759334666361081 1.509429048851212E9	13.759334666361081 -0.004683137514382763	22.959623092063797 1.5037582455518196E9
14.455950910036993 0.7311799056614765	13.767693687758667 -0.5706831635804663	14.455950910036993 4.1788819184710035E9	13.767693687758667 1.509309909593942E9	13.767693687758667 -0.004678065476755645	22.980997624720437 1.504119552117528E9
14.46505160310683 0.7349491431141812	13.776078436629295 -0.5701748349497455	14.46505160310683 4.520944747035839E9	13.776078436629295 1.5091999429353068E9	13.776078436629295 -0.004673349105574377	23.002377238289245 1.504520336821382E9
14.47414921827341 0.7387081449463979	13.784497234567768 -0.5696964240933431	14.47414921827341 4.90308015234746E9	13.784497234567768 1.509099148875306E9	13.784497234567768 -0.004668988400839403	23.023762420599276 1.504960599663382E9
14.48266429398759 0.7422604767594949	13.791390067278757 -0.5693273066452234	14.48266429398759 5.307563025886707E9	13.791390067278757 1.5090229859021912E9	13.791390067278757 -0.004665689658015505	23.046392136764624 1.5054719495307028E9
14.491184970936688 0.7458254240322537	13.798312487610627 -0.5689768801781421	14.491184970936688 5.774462272542346E9	13.798312487610627 1.508952269120749E9	13.798312487610627 -0.0046626216542038365	23.069027453284633 1.506052584502448E9
14.499718477035312 0.7494029867646761	13.805271101773839 -0.5686451446920797	14.499718477035312 6.303777892314377E9	13.805271101773839 1.5088869985309782E9	13.805271101773839 -0.0046597843894037325	23.091668952827963 1.5067025045786183E9
14.508272007675425 0.7529931649567638	13.810954534734318 -0.5683895135864718	14.508272007675425 6.8955098852028E9	13.810954534734318 1.5088378861854486E9	13.810954534734318 -0.004657656822799506	23.11431721758606 1.5074217097592132E9
14.516441531932147 0.7564275357873393	13.816669978959858 -0.5681482985191169	14.516441531932147 7.530659990268455E9	13.816669978959858 1.5087927812044663E9	13.816669978959858 -0.004655713606466328	23.138280864388058 1.508261891001098E9
14.524603535123124 0.7598637454908337	13.822421950181253 -0.5679214994900255	14.524603535123124 8.2578930422598E9	13.822421950181253 1.508751683588031E9	13.822421950181253 -0.004653954740404421	23.162251359094846 1.5092277812157786E9
14.532764338448118 0.7633017940672451	13.827196672738859 -0.5677477883277371	14.532764338448118 9.077209041176834E9	13.827196672738859 1.5087215148801546E9	13.827196672738859 -0.004652686817925412	23.186229397390992 1.5103193804032555E9
14.540930265893326 0.7667416815165753	13.832002880764385 -0.5675961413757404	14.540930265893326 9.98860798701956E9	13.832002880764385 1.50869739026674E9	13.832002880764385 -0.004651726307502769	23.210215674304692 1.511536688563528E9
14.547929220159096 0.7696898245886077	13.83684353427331 -0.5674665586340337	14.547929220159096 1.0858934766977634E10	13.83684353427331 1.5086793097477875E9	13.83684353427331 -0.004651073209136159	23.235591617682005 1.512967060949919E9
14.55491475236651 0.7726219020614566	13.841250233578718 -0.5673578628262055	14.55491475236651 1.1831395398472952E10	13.841250233578718 1.5086656373963664E9	13.841250233578718 -0.004650616986534573	23.26097595750158 1.5146335011992977E9
14.561890810185517 0.7755379139351257	13.845750550218217 -0.5672295204036777	14.561890810185517 1.2905989881505516E10	13.845750550218217 1.5086475160987933E9	13.845750550218217 -0.0046499230770167274	23.286369524629546 1.5165360093116639E9
14.568861357383133 0.7784378602096096	13.850367299673243 -0.5670815313664503	14.568861357383133 1.4082718216075325E10	13.850367299673243 1.508624945855069E9	13.850367299673243 -0.00464899148058251	23.311773149026664 1.5186745852870178E9
14.57679445870618 0.7816759195814891	13.855507414438154 -0.5669022823851622	14.57679445870618 1.5514989063685669E10	13.855507414438154 1.5085962852649012E9	13.855507414438154 -0.004647759134185026	23.33864415535929 1.521203034866005E9
14.584729514268481 0.7848994500348185	13.860837974757093 -0.5666992784748226	14.584729514268481 1.715204052197724E10	13.860837974757093 1.5085628091596053E9	13.860837974757093 -0.004646274895963588	23.365525484785742 1.5241902293234248E9
14.592667126812827 0.7881084515696015	13.866372968757682 -0.5664725196354228	14.592667126812827 1.8993872590950035E10	13.866372968757682 1.5085245175391812E9	13.866372968757682 -0.004644538765917972	23.392418129849492 1.5276361686592774E9
14.60060789849975 0.7913029241858327	13.872511860194987 -0.566198363786218	14.60060789849975 2.1040485270604053E10	13.872511860194987 1.5084769731677408E9	13.872511860194987 -0.004642340404279578	23.41932308184169 1.5315408528735628E9
14.610391386289837 0.7952330845156164	13.878908326367014 -0.5658856311291887	14.610391386289837 2.3791742528619373E10	13.878908326367014 1.5084218857372148E9	13.878908326367014 -0.004639738636294411	23.44774486591833 1.5361874466864004E9
14.620175584920187 0.7991580307313546	13.885568215175539 -0.5655343216643223	14.620175584920187 2.70781431981128E10	13.885568215175539 1.5083592552476025E9	13.885568215175539 -0.004636733461961807	23.476179347488298 1.5417517728939278E9
14.629961623927446 0.803077762833051	13.892940761549871 -0.5651093076509008	14.629961623927446 3.0899687279084335E10	13.892940761549871 1.508282469340766E9	13.892940761549871 -0.00463299592714106	23.504627708435788 1.548233831496145E9
14.639750632211188 0.8069922808207055	13.900614067543192 -0.5646260026555217	14.639750632211188 3.525637477153397E10	13.900614067543192 1.5081950229528644E9	13.900614067543192 -0.004628651712302979	23.533091128916062 1.555633622493052E9
14.65134265843318 0.8116176553318626	13.908589303716397 -0.5640844066781652	14.65134265843318 4.101818049300791E10	13.908589303716397 1.5080969160838976E9	13.908589303716397 -0.004623700817447341	23.562063792003798 1.5641910198867369E9
14.662931929726502 0.8162262585077125	13.917455043904267 -0.5634276600099577	14.662931929726502 4.814393321663368E10	13.917455043904267 1.507977822061006E9	13.917455043904267 -0.004617596757160448	23.591051016412294 1.5744989145580332E9
14.674520321816523 0.8208180903482605	13.926657870597825 -0.5626872612534468	14.674520321816523 5.663363294241127E10	13.926657870597825 1.507845162296339E9	13.926657870597825 -0.004610625546815684	23.62005406181008 1.5865573065069413E9
14.686109710855503 0.8253931508535066	13.936197847835716 -0.5618632104086361	14.686109710855503 6.648727967034069E10	13.936197847835716 1.5076989367898965E9	13.936197847835716 -0.0046027871864128276	23.64907418580547 1.6003661957334614E9
14.698410367324627 0.8302262231155089	13.946849996916088 -0.560865789578588	14.698410367324627 7.84433633517922E10	13.946849996916088 1.5075239924228094E9	13.946849996916088 -0.004593204892365922	23.67808629110241 1.6161115567618217E9
14.710703448156025 0.8350525714975481	13.95788546437332 -0.5597537418707352	14.710703448156025 9.34818544147827E10	13.95788546437332 1.5073339731505158E9	13.95788546437332 -0.004582441293461193	23.70711449126471 1.6351169802210293E9
14.72299118962208 0.8398721959996207	13.969307086243274 -0.5585270672850653	14.72299118962208 1.1160275285931216E11	13.969307086243274 1.5071288789730148E9	13.969307086243274 -0.0045704963896984205	23.7361600584354 1.6573824661110845E9
14.735275830911075 0.844685096621725	13.982077963479473 -0.557055045442449	14.735275830911075 1.3280605868538062E11	13.982077963479473 1.506889192679806E9	13.982077963479473 -0.0045560803076385445	23.765224262477034 1.6829080144319868E9
14.746074904977657 0.8489623833095452	13.995309336366496 -0.5554352767492903	14.746074904977657 1.546557565104766E11	13.995309336366496 1.5066362536985712E9	13.995309336366496 -0.00454015648039341	23.794275593255286 1.712042632049376E9
14.756883807864357 0.8532599148056379	14.009011948836847 -0.5536677612055785	14.756883807864357 1.8178750828158795E11	14.009011948836847 1.5063700620293097E9	14.009011948836847 -0.00452272490796224	23.823344650334292 1.747271014148961E9
14.76770830310198 0.8575776911100048	14.024277080329899 -0.5515856177428597	14.76770830310198 2.142013139987147E11	14.024277080329899 1.506070076446402E9	14.024277080329899 -0.004502134445131923	23.8524327177905 1.788593160730742E9
14.778554129363785 0.861915712222646	14.040140025849688 -0.5493265536204008	14.778554129363785 2.5189717366185678E11	14.040140025849688 1.5057632631229305E9	14.040140025849688 -0.004479768528112383	23.8815410771845 1.8360090717947187E9
14.789719541958531 0.8663988660958486	14.056625494139462 -0.5468905688381893	14.789719541958531 2.966327580289926E11	14.056625494139462 1.5054496220588946E9	14.056625494139462 -0.0044556271569029535	23.910631504775733 1.8901658166568754E9
14.800882757313683 0.8709106077723616	14.074819211991105 -0.5441000538235885	14.800882757313683 3.531708839138481E11	14.074819211991105 1.5051126892425041E9	14.074819211991105 -0.004427961765031242	23.939741388168468 1.9557290676049187E9
14.812050104375482 0.8754509372521797	14.093837493736265 -0.5411099251192679	14.812050104375482 4.215115513164232E11	14.093837493736265 1.50477834007409E9	14.093837493736265 -0.004398347039128559	23.968872022684078 2.0326988246388483E9
14.82322790507197 0.8800198545353011	14.113722630923732 -0.5379201827252151	14.82322790507197 5.01654760236718E11	14.113722630923732 1.5044465745536506E9	14.113722630923732 -0.004366782979194129	23.998024700877874 2.1210750877586644E9
14.833050248847723 0.884070272715296	14.134877196034562 -0.5344645457657426	14.833050248847723 5.843537967720743E11	14.134877196034562 1.5041158494843678E9	14.134877196034562 -0.004332644568985967	24.027154242335293 2.2220580610595217E9
14.842862319281517 0.8881627007204331	14.157124288399032 -0.5307886677556874	14.842862319281517 6.872288433002314E11	14.157124288399032 1.503794904515407E9	14.157124288399032 -0.004296429543911629	24.05630506650984 2.3443952546526084E9
14.852668400990197 0.8922971385507124	14.180516585554116 -0.5268925486950407	14.852668400990197 8.102798998211892E11	14.180516585554116 1.5034837396467688E9	14.180516585554116 -0.004258137903970894	24.085478479135368 2.488086668537925E9
14.862472786442014 0.8964735862061373	14.200995953391084 -0.5234475831307419	14.862472786442014 9.535069663349476E11	14.200995953391084 1.503232708940701E9	14.200995953391084 -0.004224379009768132	24.114675782915203 2.6531323027154703E9
14.870787202708188 0.9000659081722455	14.22243324942728 -0.5198016045957052	14.870787202708188 1.0948348260129536E12	14.22243324942728 1.5029895240687773E9	14.22243324942728 -0.0041887628295563814	24.14384437434673 2.8417790881541624E9
14.879089066058514 0.9037309981890269	14.244860044368131 -0.5159546130899146	14.879089066058514 1.2699042568057686E12	14.244860044368131 1.5027541850309978E9	14.244860044368131 -0.0041512893633349765	24.173036170897042 3.0703768031410666E9
14.887380966694963 0.9074688562564814	14.263991081904178 -0.512623204111649	14.887380966694963 1.4787152587133923E12	14.263991081904178 1.5025677104971104E9	14.263991081904178 -0.004118930093561791	24.20225248770325 3.3389254476761823E9
14.895665504164185 0.9112794823746055	14.28388359062077 -0.5091026571956929	14.895665504164185 1.7212678317358252E12	14.28388359062077 1.5023861222480388E9	14.28388359062077 -0.00408483199609433	24.23149463659415 3.6474250217595096E9
14.90332897880508 0.9149990271674495	14.304554109638959 -0.5053929723420358	14.90332897880508 1.9913201791655742E12	14.304554109638959 1.5022094202837827E9	14.304554109638959 -0.0040489950709318165	24.260702155462265 4.0002217211768813E9
14.911012709859895 0.9188056672315215	14.325473370273185 -0.5015842758008313	14.911012709859895 2.330551607329427E12	14.325473370273185 1.5020451701415706E9	14.325473370273185 -0.004012331777372592	24.289934894357025 4.427562668401428E9
14.918738920409798 0.9226994025668231	14.344470911418304 -0.49799328871193804	14.918738920409798 2.7389621162273823E12	14.344470911418304 1.5019011046516929E9	14.344470911418304 -0.0039777761767823	24.319194176635264 4.929447863433149E9
14.92652947001735 0.9266802331733528	14.361546739107862 -0.49462001107534537	14.92652947001735 3.2165517058594414E12	14.361546739107862 1.5017772238141499E9	14.361546739107862 -0.003945328269160387	24.348481322055683 5.505877306272045E9
14.933591652724614 0.9303178676589416	14.378873603891066 -0.4909455574522239	14.933591652724614 3.726621904357058E12	14.378873603891066 1.501651819143927E9	14.378873603891066 -0.003909900561626657	24.377727670891655 6.165781383481728E9
14.940636992428777 0.9339565652117932	14.394824429428981 -0.4873747364380021	14.940636992428777 4.3396603533249775E12	14.394824429428981 1.5015387645605674E9	14.394824429428981 -0.0038754296680666442	24.407001343238015 6.963696650378071E9
14.94768233213294 0.937596325831902	14.40942195387368 -0.4839075480326622	14.94768233213294 5.055667052763199E12	14.40942195387368 1.5014380600640705E9	14.40942195387368 -0.003841915588479573	24.43630366932719 7.899623106961078E9
14.954744514840202 0.9412371495192735	14.423302794949636 -0.48041090550670074	14.954744514840202 5.874642002671724E12	14.423302794949636 1.501343325526998E9	14.423302794949636 -0.003808063671241869	24.465635975493235 8.973560753230745E9
14.962535064447755 0.9452199155249774	14.437089350734107 -0.4768922941488656	14.962535064447755 6.922716348606529E12	14.437089350734107 1.5012550869581723E9	14.437089350734107 -0.0037740407941915253	24.494558566438318 1.0189029333655148E10
14.97026127499766 0.9491175004902503	14.450873810239441 -0.47335171395915143	14.97026127499766 8.160976475493699E12	14.450873810239441 1.5011733443575926E9	14.450873810239441 -0.0037398469573285418	24.523509943931316 1.164984411672447E10
14.977945006052476 0.9529299044150923	14.464295117611508 -0.4699934031937767	14.977945006052476 9.589422383333232E12	14.464295117611508 1.5011013409381733E9	14.464295117611508 -0.0037075138726896393	24.552491394499857 1.3356005102438715E10
14.985608480693372 0.9566571272994979	14.478883818429743 -0.4665493173548674	14.985608480693372 1.1208054072125129E13	14.478883818429743 1.5010330032318442E9	14.478883818429743 -0.0036745569746391435	24.58150420067094 1.530751229079788E10
14.996091201398306 0.9615210901219493	14.49470262576738 -0.4630194564424288	14.996091201398306 1.3743972843908117E13	14.49470262576738 1.500968331238605E9	14.49470262576738 -0.0036409762631766105	24.609692060036327 1.7480543050422325E10
15.006579428296522 0.9662055482257204	14.510298974719912 -0.45984704215060024	15.006579428296522 1.6770857837428715E13	14.510298974719912 1.5009146393953755E9	14.510298974719912 -0.003611089922462175	24.637909259607365 2.0066425799996838E10
15.017096767480885 0.9707105016108057	14.527667052344531 -0.4566666807509927	15.017096767480885 2.028870905268692E13	14.527667052344531 1.5008646416898887E9	14.527667052344531 -0.003581577869209763	24.66615698879038 2.306516053952141E10
15.027666629993188 0.975035950277209	14.54682230088172 -0.4534783722435902	15.027666629993188 2.429752648968274E13	14.54682230088172 1.500818338122144E9	14.54682230088172 -0.003552440103419153	24.694436433139565 2.647674726899605E10
15.040713959864343 0.9800485744374035	14.563760267607234 -0.45108170915721235	15.040713959864343 3.013419903383719E13	14.563760267607234 1.5007863637496238E9	14.563760267607234 -0.0035312814381082145	24.72190784810228 3.025805113008773E10
15.053681432437097 0.9846711365516976	14.580685466602224 -0.44891461992941384	15.053681432437097 3.657077805909915E13	14.580685466602224 1.5007591802889078E9	14.580685466602224 -0.0035127584870486847	24.749409023985155 3.471207479964385E10
15.066612979242239 0.9889036366200843	14.597629757091951 -0.44697710456018225	15.066612979242239 4.360726356546861E13	14.597629757091951 1.5007367877399962E9	14.597629757091951 -0.0034968712502397867	24.77694105904549 3.983881827766441E10
15.079552897723902 0.9927460746425707	14.61261480498724 -0.4454207647001889	15.079552897723902 5.124365555294558E13	14.61261480498724 1.500719975717447E9	14.61261480498724 -0.0034847848101716714	24.804505047851936 4.563828156414942E10
	14.62655068416361 -0.4440514631560175		14.62655068416361 1.5007059840674949E9	14.62655068416361 -0.0034745910426369217	24.831278350500366 5.2031175773298615E10
	14.63950728154125 -0.4428691999276646		14.63950728154125 1.5006948127901387E9	14.63950728154125 -0.0034662899476353157	24.858081706838785 5.9485466073968666E10
	14.652971263420016 -0.44167470953815435		14.652971263420016 1.5006839947667873E9	14.652971263420016 -0.0034582409556663815	24.884916129786955 6.800115246615957E10
	14.666206824613594 -0.44050981101569153		14.666206824613594 1.5006738567047498E9	14.666206824613594 -0.003450595579554517	24.911782628750824 7.757823494987132E10
	14.679298497205636 -0.43937450436026904		14.679298497205636 1.5006643986040251E9	14.679298497205636 -0.0034433538192996114	24.937875615557928 8.807307257525993E10
	14.693764864530165 -0.43807601914885996		14.693764864530165 1.5006535985259597E9	14.693764864530165 -0.003434943508981437	24.963998826047096 1.0019266050188245E11
	14.709041089984625 -0.4366807037783387		14.709041089984625 1.500642244455331E9	14.709041089984625 -0.003425906634708654	24.990153193375598 1.1393699872973889E11
	14.725153061567923 -0.4351885582486874		14.725153061567923 1.500630336392139E9	14.725153061567923 -0.003416243196480818	25.01633964736988 1.2930608725882927E11
	14.739874726240886 -0.433792594940015		14.739874726240886 1.5006193400853732E9	14.739874726240886 -0.003407097761667811	25.041769619615533 1.46046595590995E11
	14.755755611437602 -0.43234215321385516		14.755755611437602 1.5006084820894547E9	14.755755611437602 -0.003397983501816527	25.067229869063677 1.6520658680569907E11
	14.772795816663757 -0.4308372330701955		14.772795816663757 1.5005977624043827E9	14.772795816663757 -0.003388900416926078	25.0927212544512 1.867860609029414E11
	14.786111940129114 -0.42974533002844684		14.786111940129114 1.5005906836832213E9	14.786111940129114 -0.003382940869585128	25.11824463137227 2.1078501788272208E11
	14.800277296466824 -0.42880461625289623		14.800277296466824 1.5005862644933605E9	14.800277296466824 -0.0033797333594504106	25.14302873661267 2.3676499296291794E11
	14.815294544402153 -0.42801509174354724		14.815294544402153 1.5005845048348002E9	14.815294544402153 -0.003379277886521593	25.167843064065572 2.6626139427880716E11
	14.828432475534685 -0.42742495138168035		14.828432475534685 1.5005846537939265E9	14.828432475534685 -0.0033807538236497745	25.192688403186498 2.992742218303898E11
	14.840709450570534 -0.42676397474601213		14.840709450570534 1.5005832563791492E9	14.840709450570534 -0.0033805673894893315	25.21756554047858 3.358034756176657E11
	14.852212743299388 -0.4260321618365337		14.852212743299388 1.5005803125904684E9	14.852212743299388 -0.003378718584039931	25.241980873186627 3.7551391357087946E11
	14.865256389418843 -0.4251142816941327		14.865256389418843 1.500575653427281E9	14.865256389418843 -0.0033752844965735393	25.266426924811757 4.203501907985059E11
	14.877835861625094 -0.4241168674665312		14.877835861625094 1.5005698547042549E9	14.877835861625094 -0.003370557801835484	25.290904444157185 4.7031230730054517E11
	14.890022704646515 -0.42303991915373107		14.890022704646515 1.5005629164213903E9	14.890022704646515 -0.003364538499825321	25.31541417714199 5.254002630769971E11
	14.903799820253234 -0.4215980198390801		14.903799820253234 1.5005524721623373E9	14.903799820253234 -0.0033549384648803313	25.341318512286307 5.896397762374476E11
	14.917540703067793 -0.41990476352251616		14.917540703067793 1.5005397429376786E9	14.917540703067793 -0.003342498286169505	25.36725897458272 6.624558323278074E11
	14.931245640589173 -0.4179601502040251		14.931245640589173 1.5005247287474136E9	14.931245640589173 -0.003327217963691954	25.393236450621377 7.438484313480763E11
	14.943441499612334 -0.4158919911839023		14.943441499612334 1.500508589494035E9	14.943441499612334 -0.003309999552018273	25.41925182320818 8.338175732982545E11
	14.955959182565937 -0.41351148198306387		14.955959182565937 1.5004905532108505E9	14.955959182565937 -0.003289691334984136	25.447120545729902 9.403775625210911E11
	14.968862566405377 -0.4108186226015169		14.968862566405377 1.500470619897859E9	14.968862566405377 -0.003266293312589653	25.47503298189468 1.0616664513911797E12
	14.979994977598144 -0.40827024178351135		14.979994977598144 1.500452519043754E9	14.979994977598144 -0.0032438477420027043	25.50299022414634 1.1976842399085205E12
	14.991813109278866 -0.405455329754175		14.991813109278866 1.5004334951142688E9	14.991813109278866 -0.003218995953297555	25.530993359684846 1.3484309280731133E12
	15.004401864020052 -0.40237388651349004		15.004401864020052 1.5004135481094024E9	15.004401864020052 -0.0031917379464733173	25.560974286799286 1.5274094634462136E12
	15.01817894949679 -0.39900226838530717		15.01817894949679 1.5003932199103715E9	15.01817894949679 -0.0031620262279234987	25.59100815876919 1.7315056763570483E12
	15.031917493964364 -0.39571923690601185		15.031917493964364 1.5003745201381822E9	15.031917493964364 -0.003133346381960612	25.62109631837983 1.9607195668056167E12
	15.04568631460306 -0.3925247920755881		15.04568631460306 1.5003574487928329E9	15.04568631460306 -0.003105698408583769	25.65124010116159 2.2150511347919194E12
	15.06367189799524 -0.38877775975854423		15.06367189799524 1.5003391067927878E9	15.06367189799524 -0.003074261568610904	25.683492584968253 2.5174344433337515E12
	15.081005908843673 -0.38537350036849194		15.081005908843673 1.5003234458572617E9	15.081005908843673 -0.0030463373209924658	25.71580924266068 2.861818361098894E12
	15.0976923392494 -0.3823120139054117		15.0976923392494 1.500310465986255E9	15.0976923392494 -0.003021925665727788	25.748191720027194 3.248202888087347E12
	15.118063023766526 -0.37883214451645575		15.118063023766526 1.5002967125007038E9	15.118063023766526 -0.0029951516605717385	25.78064165284144 3.676588024299111E12
	15.137874232716426 -0.37561211851464105		15.137874232716426 1.5002847559087815E9	15.137874232716426 -0.00297110679113144	25.81533628303578 4.185757626085619E12
	15.157189434359438 -0.37265193589995516		15.157189434359438 1.5002745962104886E9	15.157189434359438 -0.0029497910574058936	25.850108729402518 4.762609942922132E12
	15.176695981234182 -0.3698082583628741		15.176695981234182 1.5002653289806287E9	15.176695981234182 -0.002930081911399541	25.884961002206882 5.40714497480865E12
	15.196531839661407 -0.36692597502920865		15.196531839661407 1.5002563607890074E9	15.196531839661407 -0.0029102739185402635	25.91989509793339 6.119362721745174E12
	15.216861262132158 -0.36400508589895164		15.216861262132158 1.5002476916356244E9	15.216861262132158 -0.0028903670788272837	25.955852720567957 6.931298210356226E12
	15.236034165427881 -0.3611949676912998		15.236034165427881 1.5002395137699854E9	15.236034165427881 -0.002870988068940817	25.9918979237596 7.838580761780511E12
	15.256465561468433 -0.35796527427166946		15.256465561468433 1.500230358184501E9	15.256465561468433 -0.0028477538205777817	26.028032894789465 8.84121037601803E12
	15.278281564129575 -0.3543160056400607		15.278281564129575 1.5002202248791707E9	15.278281564129575 -0.0028206643337382884	26.06425980467891 9.93918705306878E12
	15.296512718436196 -0.35088650406250554		15.296512718436196 1.5002109097163696E9	15.296512718436196 -0.002793810981391865	26.099651090574795 1.1113419659865611E13
	15.315566900022036 -0.3472039556515236		15.315566900022036 1.5002013766000288E9	15.315566900022036 -0.002764735515054962	26.135131075961528 1.2398833853393422E13
	15.335458173962454 -0.3432683604071114		15.335458173962454 1.5001916255301478E9	15.335458173962454 -0.002733437934727579	26.170701792089826 1.379542963365221E13
	15.35118664147544 -0.340176608290629		15.35118664147544 1.5001843979861314E9	15.35118664147544 -0.002708942007654481	26.20636525470741 1.530320700064198E13
	15.367004073884951 -0.33710780690335707		15.367004073884951 1.5001775192941437E9	15.367004073884951 -0.0026847501255476977	26.241187899781067 1.6888643279443719E13
	15.382911601773957 -0.3340619562452902		15.382911601773957 1.500170989454184E9	15.382911601773957 -0.0026608622884072295	26.276099939992964 1.8591364839744633E13
	15.396383797276727 -0.3315478083768246		15.396383797276727 1.5001658342828114E9	15.396383797276727 -0.0026413310275366095	26.311103256009694 2.0411371681544723E13
	15.40967236429107 -0.3291312656747758		15.40967236429107 1.5001610493798404E9	15.40967236429107 -0.0026227408823104046	26.34619971382464 2.2348663804843992E13
	15.422777310824536 -0.3268123281391331		15.422777310824536 1.5001566347452705E9	15.422777310824536 -0.0026050918527282816	26.38046284232233 2.435240024495959E13
	15.434262982902432 -0.3248503373851639		15.434262982902432 1.5001530264054873E9	15.434262982902432 -0.0025903761241827814	26.414815712896267 2.646772398072594E13
	15.445426709450459 -0.32300828158215555		15.445426709450459 1.5001497370958004E9	15.445426709450459 -0.002576767959486915	26.449260063537107 2.8694635012143047E13
	15.456268748975184 -0.3212861607301063		15.456268748975184 1.5001467668162088E9	15.456268748975184 -0.0025642673586405715	26.483797618425193 3.1033133339210902E13
	15.46606866927386 -0.3197973719755245		15.46606866927386 1.5001442736554031E9	15.46606866927386 -0.0025537031240648886	26.518204339750856 3.3478331721265484E13
	15.475447022685879 -0.3184322258040888		15.475447022685879 1.500142048062408E9	15.475447022685879 -0.002544243150652604	26.552471608875738 3.600039590337925E13
	15.48440501821433 -0.3171907222158028		15.48440501821433 1.5001400900372229E9	15.48440501821433 -0.0025358874384039396	26.58660320372113 3.8599325885552195E13
	15.49316240469287 -0.31604476746765986		15.49316240469287 1.50013833918799E9	15.49316240469287 -0.0025284846838798955	26.620602947435163 4.127512166778433E13
	15.501329525438088 -0.31503371876984954		15.501329525438088 1.5001368418440022E9	15.501329525438088 -0.002522241749234545	26.6547721169693 4.402893377012014E13
	15.508911281062012 -0.3141575761223594		15.508911281062012 1.5001355980052595E9	15.508911281062012 -0.0025171586344678873	26.68883394788321 4.681791061091916E13
	15.516565233547583 -0.31332234886448607		15.516565233547583 1.5001344529152074E9	15.516565233547583 -0.002512620993532556	26.7227917952146 4.9642052190181375E13
	15.523664104150557 -0.31257690568197116		15.523664104150557 1.5001334570405433E9	15.523664104150557 -0.0025087506564831505	26.756649044913523 5.250135850790679E13
	15.53022377656611 -0.31192124657480047		15.53022377656611 1.5001326103812664E9	15.53022377656611 -0.0025055476233188942	26.79058422209876 5.538068699247874E13
	15.536502733672382 -0.31131908883940707		15.536502733672382 1.5001318551073062E9	15.536502733672382 -0.0025027920987792393	26.8244425675157 5.824987186112005E13
	15.542343645532073 -0.3107760912435298		15.542343645532073 1.5001311900799456E9	15.542343645532073 -0.0025004320346795348	26.858226930652425 6.11089131138307E13
	15.547771354296321 -0.31029225378715974		15.547771354296321 1.5001306152991834E9	15.547771354296321 -0.0024984674310197805	26.89194017975627 6.39578107506107E13
	15.552909259262986 -0.309843596133077		15.552909259262986 1.5001300896591575E9	15.552909259262986 -0.002496707984587677	26.92501963025081 6.67166536875213E13
	15.55776783135634 -0.309421417688708		15.55776783135634 1.5001295968803875E9	15.55776783135634 -0.0024950546305090313	26.958051851846445 6.942480300549486E13
	15.562377036719509 -0.3090257184540546		15.562377036719509 1.5001291369628735E9	15.562377036719509 -0.0024935073687836215	26.991039028808647 7.208225870453139E13
	15.567194517859722 -0.30860525620477386		15.567194517859722 1.5001286374748745E9	15.567194517859722 -0.002491752392672298	27.023983354362493 7.468902078463089E13
	15.571865898886962 -0.3081825670122216		15.571865898886962 1.5001281221032195E9	15.571865898886962 -0.002489837279486929	27.055473041945145 7.710934592059586E13
	15.57642239986049 -0.3077576508763906		15.57642239986049 1.5001275908479078E9	15.57642239986049 -0.0024877620292272926	27.08694068391925 7.945415648213917E13
	15.581859497102442 -0.3072124459614871		15.581859497102442 1.5001268739750748E9	15.581859497102442 -0.0024847417929319	27.118387770942746 8.172345246926086E13
	15.58727960245781 -0.30661676373814917		15.58727960245781 1.500126061613959E9	15.58727960245781 -0.0024810859341192213	27.14981579659839 8.39172338819609E13
	15.592704335306935 -0.3059706042063679		15.592704335306935 1.5001251537645602E9	15.592704335306935 -0.0024767944527881456	27.17981317226564 8.592425424236722E13
	15.599168926947153 -0.3050882538264039		15.599168926947153 1.5001238643891873E9	15.599168926947153 -0.002470375098109213	27.209806697291274 8.784600233198961E13
	15.605724508486091 -0.3040652528567991		15.605724508486091 1.5001223489426842E9	15.605724508486091 -0.002462481281193197	27.239797346839804 8.96824781508281E13
	15.612371593975633 -0.3029016012975445		15.612371593975633 1.5001206074250507E9	15.612371593975633 -0.002453113002039876	27.269786096356256 9.143368169888269E13
	15.619204714767228 -0.30150167675201534		15.619204714767228 1.500118497220069E9	15.619204714767228 -0.0024413919390475778	27.298939313349564 9.304578378458928E13
	15.626200108461472 -0.2998887174678062		15.626200108461472 1.5001160962129989E9	15.626200108461472 -0.0024276033729605526	27.328101926928937 9.457018007378095E13
	15.633379924051905 -0.2980627234449136		15.633379924051905 1.5001134044038398E9	15.633379924051905 -0.0024117473037788004	27.35727458030127 9.600687056645772E13
	15.639734137378518 -0.29625246940198036		15.639734137378518 1.5001107777027588E9	15.639734137378518 -0.0023958262529980576	27.386457916009604 9.735585526261956E13
	15.64637484432898 -0.2942390669530708		15.64637484432898 1.50010792656054E9	15.64637484432898 -0.0023780263138923905	27.41507697550045 9.859090061324723E13
	15.653347064930184 -0.29202251609817953		15.653347064930184 1.5001048509771836E9	15.653347064930184 -0.002358347486461688	27.4437159153788 9.973900343810392E13
	15.659972074135876 -0.2898215975838374		15.659972074135876 1.5001018750362473E9	15.659972074135876 -0.0023387534057200962	27.47237514385693 1.0080016373718966E14
	15.667056325830082 -0.28743336981473444		15.667056325830082 1.5000987419759479E9	15.667056325830082 -0.002317494677361643	27.501055068280802 1.017743815105044E14
	15.674641704372243 -0.2848578327908706		15.674641704372243 1.500095451796285E9	15.674641704372243 -0.0022945713013863287	27.52949616642681 1.0265500561095731E14
	15.682508045274902 -0.2822023097444939		15.682508045274902 1.5000921661445875E9	15.682508045274902 -0.002270971081909657	27.557966198322138 1.0344731935782275E14
	15.691040585485574 -0.27937766001386155		15.691040585485574 1.5000887907787914E9	15.691040585485574 -0.00224594907321063	27.586465407370017 1.0415132275110073E14
	15.700271796185849 -0.2763838835989718		15.700271796185849 1.5000853256988964E9	15.700271796185849 -0.002219505275289025	27.61499403622688 1.0476701579079125E14
	15.709773429739634 -0.27341232978116725		15.709773429739634 1.50008201053842E9	15.709773429739634 -0.002193377119396157	27.64468144306234 1.0531568325642803E14
	15.720086004830742 -0.27032768253669825		15.720086004830742 1.5000786917882752E9	15.720086004830742 -0.002166423051666145	27.674409489669078 1.0576293695576402E14
	15.731229922806317 -0.2671299418655577		15.731229922806317 1.500075369448461E9	15.731229922806317 -0.002138643072098324	27.704178316869395 1.0610877688879923E14
	15.74282876860543 -0.2639918789194349		15.74282876860543 1.5000722352399707E9	15.74282876860543 -0.0021116052722262033	27.73398806490764 1.0635320305553366E14
	15.755357440372395 -0.2608311273028532		15.755357440372395 1.5000691908475451E9	15.755357440372395 -0.002084680567023823	27.765568849676097 1.0650236194966006E14
	15.768828662838889 -0.257647687015802		15.768828662838889 1.5000662362711844E9	15.768828662838889 -0.002057868956490628	27.79720529961017 1.0652778285296923E14
	15.78253140890763 -0.25465897216126887		15.78253140890763 1.500063575047743E9	15.78253140890763 -0.0020330682181359814	27.828897472533278 1.0642946576546117E14
	15.795442038373194 -0.2520166766326293		15.795442038373194 1.5000612874745324E9	15.795442038373194 -0.0020114305293120758	27.86064542596437 1.0620741068713589E14
	15.807571913578013 -0.24972080042988676		15.807571913578013 1.500059373551552E9	15.807571913578013 -0.001992955890018578	27.8971955921262 1.0579536272034789E14
	15.819173844386155 -0.24772044166080054		15.819173844386155 1.5000577542758253E9	15.819173844386155 -0.0019772608098503905	27.933833329760457 1.0517710716372795E14
	15.830121950766044 -0.24598182104563104		15.830121950766044 1.5000563849747562E9	15.830121950766044 -0.00196398810943288	27.970558643778354 1.0435264401727606E14
	15.840419021266582 -0.24450493858437827		15.840419021266582 1.5000552656483448E9	15.840419021266582 -0.001953137788766158	28.007371539056034 1.0332197328099225E14
	15.849940801052913 -0.2432806614861489		15.849940801052913 1.5000543670565817E9	15.849940801052913 -0.0019446233733255722
	15.858958384946149 -0.24221961038228645		15.858958384946149 1.5000536140606887E9	15.858958384946149 -0.0019376550539955692
	15.867472707732245 -0.24132178527279446		15.867472707732245 1.5000530066606655E9	15.867472707732245 -0.001932232830775927
	15.87522925976583 -0.24058929672165075		15.87522925976583 1.5000525356634614E9	15.87522925976583 -0.0019283260028919455
	15.882650260539103 -0.2399424972933213		15.882650260539103 1.500052139471045E9	15.882650260539103 -0.001925269542684572
	15.889752332780551 -0.23938138698781497		15.889752332780551 1.5000518180834157E9	15.889752332780551 -0.0019230634501534736
	15.895966560580923 -0.2389296162150556		15.895966560580923 1.5000515773676648E9	15.895966560580923 -0.0019216941364254012
	15.902082976776736 -0.23850495617519574		15.902082976776736 1.5000513620741353E9	15.902082976776736 -0.001920643317165239
	15.908139655662424 -0.2381074068682354		15.908139655662424 1.5000511722028272E9	15.908139655662424 -0.0019199109923735422
	15.913671219781532 -0.2377555166660299		15.913671219781532 1.5000510109229133E9	15.913671219781532 -0.0019194209362598533
	15.919338651878535 -0.23739414429573014		15.919338651878535 1.5000508456526341E9	15.919338651878535 -0.0019189222939294268
	15.925183398896625 -0.23702328975733433		15.925183398896625 1.5000506763919888E9	15.925183398896625 -0.0019184150653819296
	15.931238198636603 -0.23663225562463186		15.931238198636603 1.5000504929122016E9	15.931238198636603 -0.0019177693345293631
	15.937664999967586 -0.2361983528819378		15.937664999967586 1.5000502795456119E9	15.937664999967586 -0.001916819139611393
	15.944498656296512 -0.23572158152924683		15.944498656296512 1.5000500362922182E9	15.944498656296512 -0.0019155644806275749
	15.95173285005567 -0.23519095076008067		15.95173285005567 1.5000497518306363E9	15.95173285005567 -0.0019138464013925835
	15.959544004472924 -0.23457800081105962		15.959544004472924 1.5000494075249949E9	15.959544004472924 -0.0019114599800005303
	15.967953197920947 -0.23388273168217122		15.967953197920947 1.5000490033752935E9	15.967953197920947 -0.001908405216450749
	15.97675911442888 -0.23310703933799548		15.97675911442888 1.5000485363728454E9	15.97675911442888 -0.0019045766470920942
	15.986276572600143 -0.23220134685399696		15.986276572600143 1.5000479746451204E9	15.986276572600143 -0.0018996136390586624
	15.99651607257871 -0.23116565423016677		15.99651607257871 1.5000473181921182E9	15.99651607257871 -0.0018935161923501207
	16.007623712238473 -0.22992546287833182		16.007623712238473 1.5000465118563125E9	16.007623712238473 -0.0018855182397684586
	16.017997622479907 -0.22871401582122441		16.017997622479907 1.500045720856763E9	16.017997622479907 -0.0018774393835924172
	16.027640957832944 -0.22753131305883567		16.027640957832944 1.500044945193469E9	16.027640957832944 -0.0018692796238209972
	16.037762714985433 -0.22626970645471456		16.037762714985433 1.5000441233783379E9	16.037762714985433 -0.0018604758804204877
	16.047114197326838 -0.22510405379031173		16.047114197326838 1.5000433699479883E9	16.047114197326838 -0.0018523182774723432
	16.05569836649343 -0.22403435506561298		16.05569836649343 1.50004268490242E9	16.05569836649343 -0.0018448068149757866
	16.06406113301502 -0.22301910051638085		16.06406113301502 1.5000420435089014E9	16.06406113301502 -0.0018377558573680073
	16.071755188146447 -0.2221143484628465		16.071755188146447 1.50004147929079E9	16.071755188146447 -0.0018315639093634548
	16.078781228578226 -0.22132009890500814		16.078781228578226 1.5000409922480862E9	16.078781228578226 -0.0018262309709620181
	16.085641646869583 -0.22059149322467153		16.085641646869583 1.5000405549087646E9	16.085641646869583 -0.0018215285818505853
	16.091969925022607 -0.21995502838488878		16.091969925022607 1.5000401802411344E9	16.091969925022607 -0.0018175723287052756
	16.09776772395829 -0.21941070438565813		16.09776772395829 1.500039868245195E9	16.09776772395829 -0.0018143622115265332
	16.103263558552197 -0.21893490082325595		16.103263558552197 1.5000396044142146E9	16.103263558552197 -0.001811782822923603
	16.10848145611468 -0.21850461083184403		16.10848145611468 1.500039371089678E9	16.10848145611468 -0.0018095742402522994
	16.113443215437503 -0.21811983441140992		16.113443215437503 1.5000391682715847E9	16.113443215437503 -0.001807736463511734
	16.117932285025585 -0.21778612343322745		16.117932285025585 1.5000389958049574E9	16.117932285025585 -0.0018062327413140853
	16.122499017428023 -0.217444459133584		16.122499017428023 1.5000388183578825E9	16.122499017428023 -0.0018046531450740541
	16.127180304118667 -0.2170948415124725		16.127180304118667 1.5000386359303594E9	16.127180304118667 -0.0018029976747910856
	16.13170519274829 -0.21674659590418077		16.13170519274829 1.5000384500267494E9	16.13170519274829 -0.001801224958103754
	16.136579219440367 -0.21634808262905114		16.136579219440367 1.5000382315842927E9	16.136579219440367 -0.0017990083882608596
	16.141824581941474 -0.21589930168707294		16.141824581941474 1.500037980602989E9	16.141824581941474 -0.0017963479652621803
	16.147231240005606 -0.2154046939028662		16.147231240005606 1.500037696464051E9	16.147231240005606 -0.0017931879134256432
	16.153163580697345 -0.21481516017611657		16.153163580697345 1.5000373515005908E9	16.153163580697345 -0.0017891705737075334
	16.159630200702015 -0.2141307005068258		16.159630200702015 1.5000369457126076E9	16.159630200702015 -0.001784295946108184
	16.166234401125877 -0.2133757897065438		16.166234401125877 1.500036491569961E9	16.166234401125877 -0.001778681370206315
	16.173449521918528 -0.21247651896789055		16.173449521918528 1.5000359483255098E9	16.173449521918528 -0.0017717440968368922
	16.181278091454242 -0.21143288829085183		16.181278091454242 1.5000353159792526E9	16.181278091454242 -0.0017634841259988052
	16.1893754438237 -0.21026505809270812		16.1893754438237 1.5000346054304929E9	16.1893754438237 -0.0017540134911403502
	16.19814799719173 -0.20888071469099057		16.19814799719173 1.5000337703704755E9	16.19814799719173 -0.001742542485888122
	16.2075964111155 -0.2072798580856814		16.2075964111155 1.5000328107992005E9	16.2075964111155 -0.0017290711102416765
	16.217537129918725 -0.20544628196315795		16.217537129918725 1.5000317174182422E9	16.217537129918725 -0.001713411846976932
	16.228229279981306 -0.20324753731515255		16.228229279981306 1.5000304355739303E9	16.228229279981306 -0.0016943666188112836
	16.2396729887178 -0.2006836241416563		16.2396729887178 1.5000289652662642E9	16.2396729887178 -0.0016719354257442873
	16.25244609577299 -0.19734276029807507		16.25244609577299 1.500027093484747E9	16.25244609577299 -0.0016423478697709113
	16.26522371070803 -0.19362419102496187		16.26522371070803 1.500025099206568E9	16.26522371070803 -0.0016092176317021875
	16.27806710660389 -0.1895279163223078		16.27806710660389 1.5000229824317274E9	16.27806710660389 -0.00157254471153745
	16.29149537502982 -0.18490893792909713		16.29149537502982 1.5000207191999874E9	16.29149537502982 -0.001531077325335529
	16.304793526820937 -0.18006860766368238		16.304793526820937 1.5000184936886446E9	16.304793526820937 -0.0014875398961479167
	16.318033766193114 -0.17500692552606		16.318033766193114 1.5000163058976986E9	16.318033766193114 -0.0014419324239743911
	16.329903452319304 -0.17027525084399908		16.329903452319304 1.5000144093975322E9	16.329903452319304 -0.0013992543555803047
	16.341586421125697 -0.16547635558412122		16.341586421125697 1.5000126280648093E9	16.341586421125697 -0.0013559400591856017
	16.353150868741967 -0.16061023974642108		16.353150868741967 1.5000109618995287E9	16.353150868741967 -0.0013119895347897268
	16.36295446584471 -0.1563755544843941		16.36295446584471 1.5000096360887592E9	16.36295446584471 -0.0012737255523994637
	16.372621625255597 -0.15212326884708371		16.372621625255597 1.5000084186461515E9	16.372621625255597 -0.0012352934410903025
	16.38221254184849 -0.14785338283447924		16.38221254184849 1.5000073095717056E9	16.38221254184849 -0.001196693200861688
	16.39046751621644 -0.1441171201768343		16.39046751621644 1.500006435903527E9	16.39046751621644 -0.0011629122010129453
	16.398675559090442 -0.14036971522665187		16.398675559090442 1.500005650135831E9	16.398675559090442 -0.001129031098301648
	16.406889694837037 -0.13661116798393014		16.406889694837037 1.5000049522686179E9	16.406889694837037 -0.001095049892727463
	16.41438328984822 -0.13316584267577003		16.41438328984822 1.5000043934655914E9	16.41438328984822 -0.0010639031824259968
	16.42192552508732 -0.12970596546222257		16.42192552508732 1.500003910580777E9	16.42192552508732 -0.0010326325988085925
	16.42956523981136 -0.12623153634328776		16.42956523981136 1.5000035036141734E9	16.42956523981136 -0.001001238141874917
	16.43722519543103 -0.12278379353406432		16.43722519543103 1.5000031783411312E9	16.43722519543103 -9.700954716623808E-4
	16.44504972492326 -0.11931835464045282		16.44504972492326 1.500002929946261E9	16.44504972492326 -9.388109022597799E-4
	16.453089591608986 -0.11583521966245147		16.453089591608986 1.5000027584295623E9	16.453089591608986 -9.073844336667811E-4
	16.46186532895216 -0.1121612776786689		16.46186532895216 1.5000026660018167E9	16.46186532895216 -8.742637340444235E-4
	16.470983615125835 -0.10850831282501705		16.470983615125835 1.5000026591114311E9	16.470983615125835 -8.413780557139381E-4
	16.480501470621835 -0.10487632510149059		16.480501470621835 1.5000027377584043E9	16.480501470621835 -8.087273986751029E-4
	16.490015513312652 -0.10147797943541281		16.490015513312652 1.5000028938160162E9	16.490015513312652 -7.782397155665652E-4
	16.499446925891615 -0.09825952380944525		16.499446925891615 1.5000031028624709E9	16.499446925891615 -7.494181934413211E-4
	16.508823114254405 -0.09522095822358079		16.508823114254405 1.5000033648977673E9	16.508823114254405 -7.222628322990374E-4
	16.519677446997346 -0.09196942021644094		16.519677446997346 1.5000037130072987E9	16.519677446997346 -6.93295610933121E-4
	16.53055326476744 -0.08896379590451264		16.53055326476744 1.5000040855298352E9	16.53055326476744 -6.666305362735834E-4
	16.54147405620027 -0.08620408528779766		16.54147405620027 1.5000044824653761E9	16.54147405620027 -6.422676083203136E-4
	16.554145112559112 -0.08337056466348347		16.554145112559112 1.500004938452372E9	16.554145112559112 -6.174525214326385E-4
	16.566931117270478 -0.08083062782354045		16.566931117270478 1.5000053795834074E9	16.566931117270478 -5.954474592926315E-4
	16.579843145665702 -0.07858427476796503		16.579843145665702 1.500005805858482E9	16.579843145665702 -5.762524219000706E-4
	16.59458474211397 -0.07640034142786245		16.59458474211397 1.500006242846106E9	16.59458474211397 -5.580146409484019E-4
	16.609482171968217 -0.0745072938211182		16.609482171968217 1.5000066332571945E9	16.609482171968217 -5.427152636626751E-4
	16.624535656134807 -0.07290513194772164		16.624535656134807 1.500006977091746E9	16.624535656134807 -5.303542900426681E-4
	16.640626855043912 -0.07149494574230975		16.640626855043912 1.500007277498191E9	16.640626855043912 -5.203184788399326E-4
	16.65687484408157 -0.07032017663131906		16.65687484408157 1.5000075192943864E9	16.65687484408157 -5.130086043760871E-4
	16.673291399278018 -0.0693808246147336		16.673291399278018 1.500007702480332E9	16.673291399278018 -5.084246666504652E-4
	16.68759821227083 -0.06874274600370622		16.68759821227083 1.5000078043959389E9	16.68759821227083 -5.06907138246083E-4
	16.70207974926702 -0.06829832737651831		16.70207974926702 1.5000078336958997E9	16.70207974926702 -5.088321272124227E-4
	16.716766945817618 -0.06804756873316986		16.716766945817618 1.500007790380215E9	16.716766945817618 -5.141996335500396E-4
	16.732084598607244 -0.06776563720159334		16.732084598607244 1.5000077414170272E9	16.732084598607244 -5.20215593378893E-4
	16.7472974685311 -0.06727311760712684		16.7472974685311 1.5000077652058294E9	16.7472974685311 -5.230314867190619E-4
	16.762405654333673 -0.06657000994975615		16.762405654333673 1.5000078617466211E9	16.762405654333673 -5.226473135699914E-4
	16.77964757480148 -0.0656176235107031		16.77964757480148 1.5000080166312215E9	16.77964757480148 -5.205361429287967E-4
	16.796723783784525 -0.06456157145265795		16.796723783784525 1.500008205281123E9	16.796723783784525 -5.172910693007635E-4
	16.81364203517398 -0.06340185377560825		16.81364203517398 1.5000084276963246E9	16.81364203517398 -5.129120926854478E-4
	16.829188365228926 -0.06228708941616201		16.829188365228926 1.500008650377053E9	16.829188365228926 -5.084232247645213E-4
	16.84461550658047 -0.061136804159160896		16.84461550658047 1.5000088894619472E9	16.84461550658047 -5.03494293994212E-4
	16.859946617697855 -0.05995099800461379		16.859946617697855 1.5000091449510074E9	16.859946617697855 -4.981253003742978E-4
	16.87304377700002 -0.05892193545929647		16.87304377700002 1.5000093731347558E9	16.87304377700002 -4.933355497478429E-4
	16.88613032047679 -0.057868546179750346		16.88613032047679 1.500009614678025E9	16.88613032047679 -4.8820454853382237E-4
	16.899236007583077 -0.05679083016597897		16.899236007583077 1.500009869580814E9	16.899236007583077 -4.827322967320144E-4
	16.91017836699557 -0.055876340060541985		16.91017836699557 1.5000100924128883E9	16.91017836699557 -4.77912295278827E-4
	16.92120276523145 -0.05492912294414953		16.92120276523145 1.5000103311157398E9	16.92120276523145 -4.726763415504606E-4
	16.932334376066642 -0.05394917881679451		16.932334376066642 1.5000105856893668E9	16.932334376066642 -4.6702443554658216E-4
	16.941498917077972 -0.05312232822914975		16.941498917077972 1.5000108071251035E9	16.941498917077972 -4.6205587534642404E-4
	16.95078777943469 -0.052255207190161634		16.95078777943469 1.5000110467887363E9	16.95078777943469 -4.5661946015096514E-4
	16.96021726939107 -0.051347815699821275		16.96021726939107 1.5000113046802657E9	16.96021726939107 -4.507151899603165E-4
	16.967919447039794 -0.050582625527545666		16.967919447039794 1.5000115283316414E9	16.967919447039794 -4.4555860416539776E-4
	16.97574605824591 -0.049774425894200114		16.97574605824591 1.5000117710887063E9	16.97574605824591 -4.399328593408533E-4
	16.983706135979116 -0.048923216799777514		16.983706135979116 1.5000120329514592E9	16.983706135979116 -4.3383795548668306E-4
	16.990196732926023 -0.04820329337947182		16.990196732926023 1.5000122598138692E9	16.990196732926023 -4.285468884824847E-4
	16.996792125129346 -0.047440501222344444		16.996792125129346 1.5000125057635674E9	16.996792125129346 -4.22808929775976E-4
	17.00349696987537 -0.04663484032839538		17.00349696987537 1.5000127708005533E9	17.00349696987537 -4.166240793671569E-4
	17.009141220190987 -0.04592825616942964		17.009141220190987 1.5000130081189647E9	17.009141220190987 -4.11095855062272E-4
	17.014871667268174 -0.04517503613836826		17.014871667268174 1.5000132662316563E9	17.014871667268174 -4.050988329883384E-4
	17.020690880771753 -0.04437518023521658		17.020690880771753 1.5000135451386285E9	17.020690880771753 -3.98633013145023E-4
	17.0264949713418 -0.04352237997241115		17.0264949713418 1.5000138492967525E9	17.0264949713418 -3.9161472780791044E-4
	17.031846291914462 -0.04269794550484196		17.031846291914462 1.5000141483267987E9	17.031846291914462 -3.847571624492349E-4
	17.03674484396529 -0.04190187683249835		17.03674484396529 1.5000144422287672E9	17.03674484396529 -3.780603170686633E-4
	17.04157926497128 -0.04107814771209828		17.04157926497128 1.500014751468828E9	17.04157926497128 -3.7107206260078655E-4
	17.045968730825702 -0.040297974761510424		17.045968730825702 1.5000150484769583E9	17.045968730825702 -3.6441052164426583E-4
	17.049913249995353 -0.03956135798072591		17.049913249995353 1.500015333253158E9	17.049913249995353 -3.580756941987681E-4
	17.053972240846115 -0.038764063526664394		17.053972240846115 1.5000156458651009E9	17.053972240846115 -3.5117766626791084E-4
	17.057566385175512 -0.03802537581059706		17.057566385175512 1.5000159391267214E9	17.057566385175512 -3.447570765443561E-4
	17.060695886492432 -0.03734529483252391		17.060695886492432 1.5000162130380192E9	17.060695886492432 -3.3881392502754874E-4
	17.063638617080205 -0.03666610179241214		17.063638617080205 1.5000164893234198E9	17.063638617080205 -3.3285181133391265E-4
	17.066580489009407 -0.03594671855050269		17.066580489009407 1.5000167857613916E9	17.066580489009407 -3.265127131190101E-4
	17.06952442847705 -0.035187145106786666		17.06952442847705 1.5000171023519347E9	17.06952442847705 -3.197966303826191E-4
	17.07213280413257 -0.034449842172445067		17.07213280413257 1.5000174136402388E9	17.07213280413257 -3.1324830600754165E-4
	17.07472845561431 -0.03370241413770092		17.07472845561431 1.500017732564903E9	17.07472845561431 -3.0660587814113153E-4
	17.077339655631743 -0.03294486100254712		17.077339655631743 1.5000180591259274E9	17.077339655631743 -2.998693467836108E-4
	17.080180897688823 -0.03218232200704474		17.080180897688823 1.5000183908090448E9	17.080180897688823 -2.9311323930902936E-4
	17.083021793589158 -0.031449081945212676		17.083021793589158 1.5000187125528681E9	17.083021793589158 -2.8662943565127633E-4
	17.085862521913327 -0.030745140817043826		17.085862521913327 1.5000190243573973E9	17.085862521913327 -2.8041793581046274E-4
	17.089332539094336 -0.029914475256854978		17.089332539094336 1.5000193950753577E9	17.089332539094336 -2.7310079090192644E-4
	17.09280174770613 -0.0290815712476844		17.09280174770613 1.5000197715159748E9	17.09280174770613 -2.657596591808539E-4
	17.09627164813078 -0.028246428789526767		17.09627164813078 1.5000201536792474E9	17.09627164813078 -2.5839454064735616E-4
	17.100005763821507 -0.02733164627645923		17.100005763821507 1.500020574796764E9	17.100005763821507 -2.5031455533708417E-4
	17.104242846712545 -0.026246130074643936		17.104242846712545 1.5000210848896456E9	17.104242846712545 -2.4069468137144585E-4
	17.10898396739989 -0.024989880184070223		17.10898396739989 1.5000216839578912E9	17.10898396739989 -2.2953491875010807E-4
	17.113656414007966 -0.023667010439825553		17.113656414007966 1.5000223216909842E9	17.113656414007966 -2.177410824403267E-4
	17.118822193317172 -0.021788243221076975		17.118822193317172 1.5000232574703438E9	17.118822193317172 -2.0085837735317553E-4
	17.124481980792776 -0.01935357852781383		17.124481980792776 1.5000244912959695E9	17.124481980792776 -1.788868034878774E-4
	17.13064997731936 -0.016789749958863176		17.13064997731936 1.5000258445124185E9	17.13064997731936 -1.5575712424809125E-4
	17.13670745247567 -0.014663610258655702		17.13670745247567 1.5000269848292456E9	17.13670745247567 -1.3666587326244346E-4
	17.142654430133483 -0.012975159427184302		17.142654430133483 1.500027912246451E9	17.142654430133483 -1.2161305053026788E-4
	17.149917666093945 -0.011107076080659972		17.149917666093945 1.5000289538660953E9	17.149917666093945 -1.0504248379295061E-4
	17.15701690005844 -0.009376527388973876		17.15701690005844 1.5000299342649195E9	17.15701690005844 -8.975396971389132E-5
	17.163952159178127 -0.007783513352113581		17.163952159178127 1.5000308534429226E9	17.163952159178127 -7.574750829264592E-5
	17.172776329698348 -0.00584341589128723		17.172776329698348 1.5000319918654842E9	17.172776329698348 -5.875995753024193E-5
	17.18133721344531 -0.0040267030229026455		17.18133721344531 1.5000330750784676E9	17.18133721344531 -4.291069844686384E-5
	17.189634828205513 -0.002333374746947393		17.189634828205513 1.5000341030818722E9	17.189634828205513 -2.8199731041734504E-5
	17.20040804180772 -2.0041299129491903E-4		17.20040804180772 1.5000354228409784E9	17.20040804180772 -9.732745654856539E-6
	17.21074418798024 0.0017945155296574802		17.21074418798024 1.50003667897505E9	17.21074418798024 7.49263366117609E-6
	17.22064327285555 0.003651410815920463		17.22064327285555 1.5000378714840858E9	17.22064327285555 2.347640690669645E-5
	17.233773609139988 0.00606635792310417		17.233773609139988 1.5000394566744144E9	17.233773609139988 4.422852120877702E-5
	17.246160810762564 0.008306396354449852		17.246160810762564 1.5000409574376323E9	17.246160810762564 6.346246157107244E-5
	17.25780582229944 0.010371526109962836		17.25780582229944 1.5000423737737389E9	17.25780582229944 8.117822799391578E-5
	17.270991292316058 0.01269467912166089		17.270991292316058 1.5000440034350348E9	17.270991292316058 1.0113296003244538E-4
	17.283308371953648 0.014848659644877138		17.283308371953648 1.5000455465094264E9	17.283308371953648 1.1966044059374876E-4
	17.294767556490548 0.016833467679615133		17.294767556490548 1.5000470029969132E9	17.294767556490548 1.3676066967815897E-4
	17.305588942841926 0.018711164983638007		17.305588942841926 1.500048408240221E9	17.305588942841926 1.5298366959248715E-4
	17.315828308331362 0.020471059715348794		17.315828308331362 1.5000497489710438E9	17.315828308331362 1.682081564714491E-4
	17.325521268635228 0.0221131518747546		17.325521268635228 1.5000510251893816E9	17.325521268635228 1.8243413031571092E-4
	17.334392234401903 0.023592478684464346		17.334392234401903 1.5000521925688345E9	17.334392234401903 1.9526147923354303E-4
	17.34309896852401 0.024996066770769154		17.34309896852401 1.50005331501291E9	17.34309896852401 2.0741318604777708E-4
	17.3516981490708 0.02632391613367968		17.3516981490708 1.5000543925216074E9	17.3516981490708 2.1888925075841308E-4
	17.3603679852993 0.02758104753231283		17.3603679852993 1.500055423792179E9	17.3603679852993 2.2970848683556615E-4
	17.369296953130462 0.028783138414486764		17.369296953130462 1.500056418409763E9	17.369296953130462 2.3997641120465567E-4
	17.378542054337284 0.029930188780201483		17.378542054337284 1.5000573763743594E9	17.378542054337284 2.496930238657927E-4
	17.3885487691063 0.031038945131698803		17.3885487691063 1.5000583070815868E9	17.3885487691063 2.5894983069840646E-4
	17.399249839136026 0.03209752068659544		17.399249839136026 1.5000591965488834E9	17.399249839136026 2.6760263814362613E-4
	17.410681001219984 0.03310591544489494		17.410681001219984 1.5000600447762487E9	17.410681001219984 2.756514462012297E-4
	17.42262677437832 0.03402022864580889		17.42262677437832 1.500060808784631E9	17.42262677437832 2.8267425502281814E-4
	17.43554311876145 0.03488519427724679		17.43554311876145 1.5000615210229416E9	17.43554311876145 2.889660015342735E-4
	17.44944278643979 0.03570081233921041		17.44944278643979 1.5000621814911807E9	17.44944278643979 2.9452668573603987E-4
	17.46388892179262 0.03642813591612626		17.46388892179262 1.5000627512541316E9	17.46388892179262 2.9898538232697643E-4
	17.479469953296157 0.0371032549017416		17.479469953296157 1.5000632518935337E9	17.479469953296157 3.02467570165387E-4
	17.49618916579819 0.03772616929606709		17.49618916579819 1.500063683409386E9	17.49618916579819 3.049732492517157E-4
	17.512322600640854 0.03823492165394615		17.512322600640854 1.5000639961534395E9	17.512322600640854 3.0616143353745436E-4
	17.529537897339225 0.03869435028129242		17.529537897339225 1.500064224493005E9	17.529537897339225 3.060912701087207E-4
	17.547835485295522 0.03910445517811656		17.547835485295522 1.5000643684280827E9	17.547835485295522 3.0476275896629187E-4
	17.564658991426338 0.03940885947483341		17.564658991426338 1.500064389788242E9	17.564658991426338 3.020029215694545E-4
	17.58060027779299 0.0396579260920733		17.58060027779299 1.5000643380379653E9	17.58060027779299 2.983013527392267E-4
	17.595678202281174 0.039851655029843336		17.595678202281174 1.5000642131772525E9	17.595678202281174 2.936580524757196E-4
	17.60951330730992 0.04000578111201225		17.60951330730992 1.500064038928976E9	17.60951330730992 2.8839902074162456E-4
	17.622591927459382 0.040134463518024965		17.622591927459382 1.500063826105692E9	17.622591927459382 2.825891025910457E-4
	17.634940177573732 0.04023770224789569		17.634940177573732 1.5000635747073991E9	17.634940177573732 2.762282980246492E-4
	17.646244026277724 0.04032099875447148		17.646244026277724 1.5000632997374682E9	17.646244026277724 2.695637994919445E-4
	17.65693125705314 0.04039155187586463		17.65693125705314 1.5000630039911127E9	17.65693125705314 2.6257251499750474E-4
	17.667038437311472 0.040449361612082235		17.667038437311472 1.500062687468332E9	17.667038437311472 2.55254444541774E-4
	17.67621592941415 0.04049643681734327		17.67621592941415 1.5000623665037193E9	17.67621592941415 2.4792705659892807E-4
	17.68494691245843 0.040537283050006145		17.68494691245843 1.5000620361485834E9	17.68494691245843 2.4043634544057473E-4
	17.693279471060507 0.04057190031006552		17.693279471060507 1.5000616964029236E9	17.693279471060507 2.3278231106671404E-4
	17.700746179587732 0.040600463168474654		17.700746179587732 1.5000613707946393E9	17.700746179587732 2.254652723632225E-4
	17.707961150720752 0.04062645317582092		17.707961150720752 1.500061042737291E9	17.707961150720752 2.1809373739978182E-4
	17.7149772560101 0.0406498703321132		17.7149772560101 1.5000607122308776E9	17.7149772560101 2.1066770617716917E-4
	17.72146506661057 0.04067067722603657		17.72146506661057 1.5000603985307217E9	17.72146506661057 2.0360601490065826E-4
	17.727871364192115 0.04069094958967501		17.727871364192115 1.5000600859124482E9	17.727871364192115 1.965469988309812E-4
	17.73424669887643 0.04071068742303385		17.73424669887643 1.5000597743760562E9	17.73424669887643 1.8949065796858205E-4
	17.740805398012572 0.040731198448889394		17.740805398012572 1.5000594583909497E9	17.740805398012572 1.8230024121545978E-4
	17.747429777987136 0.040752746183016164		17.747429777987136 1.5000591459392033E9	17.747429777987136 1.7514998819867427E-4
	17.754170808029322 0.04077533062542127		17.754170808029322 1.500058837020816E9	17.754170808029322 1.680398989181145E-4
	17.761733722085456 0.040802173398863495		17.761733722085456 1.5000585080676045E9	17.761733722085456 1.6040847428477805E-4
	17.7695363955285 0.040832401295751275		17.7695363955285 1.5000581866394978E9	17.7695363955285 1.528806555085574E-4
	17.777630366713456 0.04086601431608816		17.777630366713456 1.500057872736496E9	17.777630366713456 1.4545644259011863E-4
	17.7867586470822 0.0409075062212656		17.7867586470822 1.5000575470244005E9	17.7867586470822 1.3765127567921725E-4
	17.796309494150243 0.040956377701520275		17.796309494150243 1.5000572349811068E9	17.796309494150243 1.3004981019371003E-4
	17.806326428744125 0.04101262875685574		17.806326428744125 1.500056936606614E9	17.806326428744125 1.2265204613348595E-4
	17.817445432241637 0.04108220417457087		17.817445432241637 1.5000566419589055E9	17.817445432241637 1.1517021388651655E-4
	17.82913506758841 0.041165724436630136		17.82913506758841 1.500056369225381E9	17.82913506758841 1.0802086914984883E-4
	17.84142746058382 0.04126318954304953		17.84142746058382 1.5000561184060395E9	17.84142746058382 1.0120401192448198E-4
	17.85502954641088 0.04138444827794441		17.85502954641088 1.500055884071238E9	17.85502954641088 9.44952012605907E-5
	17.8693215989364 0.041531021418067304		17.8693215989364 1.5000556842448606E9	17.8693215989364 8.830325424713432E-5
	17.88432707907535 0.041702908963434204		17.88432707907535 1.5000555189269066E9	17.88432707907535 8.262817088444591E-5
	17.898525761876073 0.04188563341886553		17.898525761876073 1.5000554058562617E9	17.898525761876073 7.80473869512735E-5
	17.913309845465506 0.04210086353423481		17.913309845465506 1.500055332690163E9	17.913309845465506 7.404670735011638E-5
	17.928690916072785 0.042348599309561585		17.928690916072785 1.5000552994286096E9	17.928690916072785 7.06261320818627E-5
	17.941339244137176 0.04256790585038939		17.941339244137176 1.5000552983731873E9	17.941339244137176 6.826112646529576E-5
	17.95397576356284 0.04280291431882599		17.95397576356284 1.5000553222148893E9	17.95397576356284 6.630815532437857E-5
	17.966627665121713 0.0430536247148785		17.966627665121713 1.5000553709537153E9	17.966627665121713 6.476721865933316E-5
	17.977062198220626 0.04327300775508913		17.977062198220626 1.500055432101766E9	17.977062198220626 6.385017577858949E-5
	17.987481424436094 0.04351401448905623		17.987481424436094 1.500055522741938E9	17.987481424436094 6.338643434400299E-5
	17.99791657415773 0.043776644916788676		17.99791657415773 1.5000556428742316E9	17.99791657415773 6.337599435601777E-5
	18.007140791409793 0.04404173635550901		18.007140791409793 1.500055789718524E9	18.007140791409793 6.395664132863216E-5
	18.01579895360253 0.0443234969961841		18.01579895360253 1.50005596365472E9	18.01579895360253 6.497869096000392E-5
	18.023892301269157 0.044621926838817494		18.023892301269157 1.5000561646828191E9	18.023892301269157 6.644214325035509E-5
	18.031073151977274 0.044932852217365316		18.031073151977274 1.500056389728822E9	18.031073151977274 6.831634547887961E-5
	18.03836279882438 0.04528420545574452		18.03836279882438 1.500056653120765E9	18.03836279882438 7.062151041825532E-5
	18.04579469962061 0.04567598655395688		18.04579469962061 1.5000569548586476E9	18.04579469962061 7.33576380683712E-5
	18.05300200220101 0.046091346788965204		18.05300200220101 1.5000572811930492E9	18.05300200220101 7.63762287603323E-5
	18.060186077759457 0.04652533497423672		18.060186077759457 1.5000576259680517E9	18.060186077759457 7.958263961760276E-5
	18.067389410389136 0.046977951109783866		18.067389410389136 1.5000579891836545E9	18.067389410389136 8.297687064118182E-5
	18.07583294878945 0.04751407470004754		18.07583294878945 1.5000584212243965E9	18.07583294878945 8.699134761835842E-5
	18.084263746106704 0.04805747703032903		18.084263746106704 1.5000588620242496E9	18.084263746106704 9.107030182819915E-5
	18.09270349397577 0.048608158100626575		18.09270349397577 1.5000593115832124E9	18.09270349397577 9.521373327003785E-5
	18.101970845404374 0.049209788453732806		18.101970845404374 1.5000598042786446E9	18.101970845404374 9.972022210291615E-5
	18.11219919961843 0.049870080373945136		18.11219919961843 1.500060348246979E9	18.11219919961843 1.046516089800989E-4
	18.123397889946112 0.05058903386126712		18.123397889946112 1.500060943488215E9	18.123397889946112 1.1000789390225225E-4
	18.135269952872996 0.05132850320441573		18.135269952872996 1.500061557772498E9	18.135269952872996 1.1545873108575939E-4
	18.14697861655774 0.052067334519388275		18.14697861655774 1.5000621790704577E9	18.14697861655774 1.2097063749150123E-4
	18.158528319766276 0.05280552780619541		18.158528319766276 1.5000628073820932E9	18.158528319766276 1.265436131196998E-4
	18.169880538686435 0.05356298847894703		18.169880538686435 1.5000634636282852E9	18.169880538686435 1.3240538201630874E-4
	18.180992309329806 0.05433080375623778		18.180992309329806 1.5000641396165009E9	18.180992309329806 1.3846156774555057E-4
	18.19186422043887 0.05510897363807832		18.19186422043887 1.500064835346739E9	18.19186422043887 1.4471217030786936E-4
	18.201365379358418 0.05582229458227683		18.201365379358418 1.500065483330362E9	18.201365379358418 1.505496105632656E-4
	18.210624512990826 0.05653943696116759		18.210624512990826 1.500066143181292E9	18.210624512990826 1.564891875728272E-4
	18.21965249932838 0.057260400774761244		18.21965249932838 1.5000668148995285E9	18.21965249932838 1.6253090133677622E-4
	18.22754015321597 0.057913309941338476		18.22754015321597 1.5000674306357522E9	18.22754015321597 1.6805961355770198E-4
	18.23525185950241 0.05856127132141342		18.23525185950241 1.500068047536309E9	18.23525185950241 1.7357856361710416E-4
	18.242814411552946 0.05920428491499674		18.242814411552946 1.5000686656011987E9	18.242814411552946 1.7908775151520478E-4
	18.249312134762533 0.059762767391853266		18.249312134762533 1.500069207091384E9	18.249312134762533 1.8389396340800972E-4
	18.25575751424845 0.06031029020750278		18.25575751424845 1.5000697413674343E9	18.25575751424845 1.8861144517501232E-4
	18.26218634465311 0.060846853361945286		18.26218634465311 1.5000702684293494E9	18.26218634465311 1.9324019681654563E-4
	18.267936257843203 0.06131440908777197		18.267936257843203 1.500070730236766E9	18.267936257843203 1.9727229446175803E-4
	18.273759602481775 0.06176800001190497		18.273759602481775 1.5000711798570867E9	18.273759602481775 2.0117262978624955E-4
	18.27969165497102 0.0622076261343425		18.27969165497102 1.5000716172903104E9	18.27969165497102 2.049412027905753E-4
	18.28574392918713 0.06262586644671497		18.28574392918713 1.5000720344333625E9	18.28574392918713 2.085057715435204E-4
	18.29201267070956 0.06302508311239041		18.29201267070956 1.500072432637608E9	18.29201267070956 2.1187654357079837E-4
	18.298534179867083 0.06340527613137059		18.298534179867083 1.5000728119030461E9	18.298534179867083 2.1505351887296436E-4
	18.30565936069156 0.06377288876919973		18.30565936069156 1.500073177471347E9	18.30565936069156 2.1807223706715644E-4
	18.313189696345656 0.06411132935455921		18.313189696345656 1.5000735110718699E9	18.313189696345656 2.2077334915582197E-4
	18.321159470470757 0.06442059788745613		18.321159470470757 1.5000738127046134E9	18.321159470470757 2.231568551388499E-4
	18.330763436716676 0.06472733499283212		18.330763436716676 1.500074105212608E9	18.330763436716676 2.2537410637402027E-4
	18.340088603682226 0.06498616403134871		18.340088603682226 1.5000743471137118E9	18.340088603682226 2.2714097818821082E-4
	18.349142235913142 0.06519708500301125		18.349142235913142 1.5000745384079247E9	18.349142235913142 2.284574705816436E-4
	18.360905509871746 0.06542161228349475		18.360905509871746 1.5000747329618444E9	18.360905509871746 2.2967901939896423E-4
	18.372254806896937 0.06560033827472811		18.372254806896937 1.5000748786574557E9	18.372254806896937 2.3047372087780987E-4
	18.38320870979768 0.06573326297671489		18.38320870979768 1.5000749754947574E9	18.38320870979768 2.3084157501862462E-4
	18.39749321012657 0.0658617318372583		18.39749321012657 1.5000750513096948E9	18.39749321012657 2.30860919033459E-4
	18.411223108160737 0.06595638350571509		18.411223108160737 1.5000750901915357E9	18.411223108160737 2.305546509863135E-4
	18.424443238113774 0.06601721798209059		18.424443238113774 1.5000750921402793E9	18.424443238113774 2.2992277087763218E-4
	18.44151827960293 0.06606816750862965		18.44151827960293 1.50007505977395E9	18.44151827960293 2.287554356832358E-4
	18.45800114135589 0.0661029575774359		18.45800114135589 1.5000750055095258E9	18.45800114135589 2.273544495204885E-4
	18.47397281570805 0.06612158818853242		18.47397281570805 1.5000749293470047E9	18.47397281570805 2.257198123896123E-4
	18.49265615281644 0.06613464557133053		18.49265615281644 1.500074817744833E9	18.49265615281644 2.234832777004972E-4
	18.51091389529356 0.06614285230257888		18.51091389529356 1.5000746855432925E9	18.51091389529356 2.2091222002917826E-4
	18.528801848736773 0.0661462083822899		18.528801848736773 1.500074532742383E9	18.528801848736773 2.1800663937632163E-4
	18.54680906805889 0.06614722375203197		18.54680906805889 1.500074348584901E9	18.54680906805889 2.1453693361317332E-4
	18.564488289734253 0.06614673083081524		18.564488289734253 1.5000741324069245E9	18.564488289734253 2.1047250730199445E-4
	18.58184148844082 0.06614472961865392		18.58184148844082 1.5000738842084537E9	18.58184148844082 2.058133604431181E-4
	18.597384129840464 0.0661418130278788		18.597384129840464 1.500073615240064E9	18.597384129840464 2.0076206908547971E-4
	18.612653378468842 0.06613798037272023		18.612653378468842 1.5000733029455845E9	18.612653378468842 1.9487685900421075E-4
	18.627672099051054 0.06613323165319063		18.627672099051054 1.5000729473250146E9	18.627672099051054 1.8815773019975528E-4
	18.640345883409093 0.06612823589255701		18.640345883409093 1.5000725894072568E9	18.640345883409093 1.8137491687697432E-4
	18.652962752848524 0.0661222848199392		18.652962752848524 1.500072175167092E9	18.652962752848524 1.734781644071584E-4
	18.665590008827643 0.06611537843535142		18.665590008827643 1.5000717046045206E9	18.665590008827643 1.6446747279130674E-4
	18.676675805690138 0.0661078007015421		18.676675805690138 1.5000711960713284E9	18.676675805690138 1.546896137142309E-4
	18.688000115701833 0.06609736160014723		18.688000115701833 1.5000705086051679E9	18.688000115701833 1.413400850951421E-4
	18.699643867752464 0.06608406113117393		18.699643867752464 1.5000696422060382E9	18.699643867752464 1.2441888693415142E-4
	18.7117036749204 0.06607056763171659		18.7117036749204 1.5000687761255198E9	18.7117036749204 1.0725623211993358E-4
	18.72376327518268 0.06605977829333565		18.72376327518268 1.5000680832716076E9	18.72376327518268 9.34415644672218E-5
	18.73582301181732 0.06605169311604175		18.73582301181732 1.5000675636443002E9	18.73582301181732 8.297488397634917E-5
	18.748799527120514 0.06604417563390985		18.748799527120514 1.5000670761804626E9	18.748799527120514 7.311486973138243E-5
	18.762564835375873 0.066036855732313		18.762564835375873 1.500066596696869E9	18.762564835375873 6.335258644296544E-5
	18.777119188962864 0.06602973341126184		18.777119188962864 1.5000661251935182E9	18.777119188962864 5.3688034111875344E-5
	18.790289219199668 0.06602371401195217		18.790289219199668 1.5000657209593258E9	18.790289219199668 4.5358426809637703E-5
	18.80369590319256 0.06601788065348035		18.80369590319256 1.500065324846947E9	18.80369590319256 3.715293466466291E-5
	18.81733952896491 0.06601223333585171		18.81733952896491 1.5000649368563814E9	18.81733952896491 2.907155767739506E-5
	18.82852971716708 0.06600775628896027		18.82852971716708 1.5000646268162901E9	18.82852971716708 2.2584471064178996E-5
	18.839670715592973 0.06600338398979044		18.839670715592973 1.500064323407342E9	18.839670715592973 1.6210258289683094E-5
	18.850762808799825 0.06599911643834933		18.850762808799825 1.5000640266295366E9	18.850762808799825 9.948919354351444E-6
	18.860141414400957 0.06599553523971569		18.860141414400957 1.5000637783136182E9	18.860141414400957 4.6910904347710665E-6
	18.86935806299446 0.06599201305442559		18.86935806299446 1.5000635356773853E9	18.86935806299446 -4.6320903401924657E-7
	18.87841307528259 0.06598854988249503		18.87841307528259 1.5000632987208376E9	18.87841307528259 -5.513979051464385E-6
	18.886250164982936 0.06598552350971776		18.886250164982936 1.5000630937102098E9	18.886250164982936 -9.896746060334688E-6
	18.893874820162914 0.06598253943009613		18.893874820162914 1.500062893801919E9	18.893874820162914 -1.4181918127077192E-5
	18.90128744345215 0.06597959764364258		18.90128744345215 1.500062698995964E9	18.90128744345215 -1.836949525135883E-5
	18.907835373966705 0.06597694646204832		18.907835373966705 1.5000625256568456E9	18.907835373966705 -2.2104905342158193E-5
	18.914142975428323 0.06597433546596942		18.914142975428323 1.5000623570705214E9	18.914142975428323 -2.5746199708743528E-5
	18.920210816493338 0.06597176465540944		18.920210816493338 1.5000621932369912E9	18.920210816493338 -2.929337835033768E-5
	18.925694420434294 0.06596937294276284		18.925694420434294 1.5000620428093445E9	18.925694420434294 -3.2557351600238365E-5
	18.930912367164055 0.06596702628136963		18.930912367164055 1.5000618970261333E9	18.930912367164055 -3.5726912618994904E-5
	18.935865600847123 0.06596472467124581		18.935865600847123 1.5000617558873565E9	18.935865600847123 -3.880206140627423E-5
	18.94048915310657 0.06596248146088879		18.94048915310657 1.5000616200900478E9	18.94048915310657 -4.1766529929599666E-5
	18.944805354235573 0.06596029076376286		18.944805354235573 1.500061489040438E9	18.944805354235573 -4.463277127675441E-5
	18.948816247423952 0.06595815257986803		18.948816247423952 1.5000613627385259E9	18.948816247423952 -4.740078544751641E-5
	18.95246724834312 0.0659560248611113		18.95246724834312 1.5000612386769576E9	18.95246724834312 -5.012394804071534E-5
	18.956115380398472 0.06595354672877551		18.956115380398472 1.5000610965960915E9	18.956115380398472 -5.324987329524771E-5
	18.959768753975716 0.06595071818285358		18.959768753975716 1.5000609364959278E9	18.959768753975716 -5.677856121100249E-5
	18.96346590464262 0.06594811819412438		18.96346590464262 1.5000607897245188E9	18.96346590464262 -6.002364494950368E-5
	18.96709732403657 0.06594601429589897		18.96709732403657 1.5000606696043804E9	18.96709732403657 -6.268349815652468E-5
	18.970663178340885 0.06594440648817557		18.970663178340885 1.5000605761355116E9	18.970663178340885 -6.47581208320655E-5
	18.97503276228531 0.06594270720752338		18.97503276228531 1.5000604758222504E9	18.97503276228531 -6.698815863326407E-5
	18.97930410551458 0.06594119781597474		18.97930410551458 1.5000603855324185E9	18.97930410551458 -6.899836505691675E-5
	18.983477573932845 0.06593987831352965		18.983477573932845 1.5000603052660148E9	18.983477573932845 -7.078874010335661E-5
	18.988789638016947 0.06593835777608259		18.988789638016947 1.5000602111456075E9	18.988789638016947 -7.28915656246229E-5
	18.993944037443732 0.0659370113513047		18.993944037443732 1.5000601262629507E9	18.993944037443732 -7.479083785577683E-5
	18.99894172293655 0.06593583903919242		18.99894172293655 1.500060050618044E9	18.99894172293655 -7.648655679692944E-5
	19.00542105723733 0.06593447489273441		19.00542105723733 1.5000599603039153E9	19.00542105723733 -7.851473515663259E-5
	19.01164069469592 0.06593329641629087		19.01164069469592 1.5000598800678196E9	19.01164069469592 -8.031940065389514E-5
	19.01760344814753 0.06593230360987778		19.01760344814753 1.5000598099097571E9	19.01760344814753 -8.190055328838402E-5
	19.02554179851228 0.06593115798052818		19.02554179851228 1.500059725279055E9	19.02554179851228 -8.381164381643463E-5
	19.03304143354298 0.06593022152681716		19.03304143354298 1.5000596525085666E9	19.03304143354298 -8.545770286205817E-5
	19.04011233228111 0.06592949424876249		19.04011233228111 1.5000595915982907E9	19.04011233228111 -8.683873042469952E-5
	19.048659792733705 0.06592879212217628		19.048659792733705 1.500059526919089E9	19.048659792733705 -8.830831781459019E-5
	19.056640904005572 0.06592827489712416		19.056640904005572 1.5000594732177243E9	19.056640904005572 -8.95307828898692E-5
	19.064084155477268 0.06592794257361678		19.064084155477268 1.5000594304941952E9	19.064084155477268 -9.050612565031451E-5
	19.07173757126706 0.06592774039468186		19.07173757126706 1.5000593933271594E9	19.07173757126706 -9.13567612594876E-5
	19.0789499868789 0.06592766072803702		19.0789499868789 1.5000593629264147E9	19.0789499868789 -9.205431394165935E-5
	19.08576566589397 0.06592770357369115		19.08576566589397 1.5000593392919612E9	19.08576566589397 -9.259878369616364E-5
	19.092911043893903 0.06592787522668875		19.092911043893903 1.500059319316079E9	19.092911043893903 -9.306109462603545E-5
	19.09981187877121 0.06592816044794692		19.09981187877121 1.5000593032193043E9	19.09981187877121 -9.343567252528911E-5
	19.106515900140362 0.06592855923747276		19.106515900140362 1.500059291001638E9	19.106515900140362 -9.372251739403564E-5
	19.11449137224904 0.06592922362130071		19.11449137224904 1.5000592801892815E9	19.11449137224904 -9.398010554317964E-5
	19.122415090968637 0.06593011849498875		19.122415090968637 1.5000592719438803E9	19.122415090968637 -9.41809362015053E-5
	19.130319360923394 0.06593124385854576		19.130319360923394 1.500059266265434E9	19.130319360923394 -9.432500936901261E-5
	19.139627375191573 0.0659330242017715		19.139627375191573 1.5000592621520717E9	19.139627375191573 -9.443982336754336E-5
	19.149038046492496 0.06593550072234944		19.149038046492496 1.5000592599249792E9	19.149038046492496 -9.451831700158036E-5
	19.158551646503756 0.06593867342028137		19.158551646503756 1.500059259584156E9	19.158551646503756 -9.45604902705685E-5
	19.16792003359435 0.06594297030462304		19.16792003359435 1.5000592611711903E9	19.16792003359435 -9.456993304757327E-5
	19.177494072138273 0.06594918303393182		19.177494072138273 1.50005926496713E9	19.177494072138273 -9.454917988416328E-5
	19.187308950307468 0.0659573116082095		19.187308950307468 1.500059270971974E9	19.187308950307468 -9.449823077978341E-5
	19.195726625044653 0.06596695823941001		19.195726625044653 1.5000592788221915E9	19.195726625044653 -9.442165603712554E-5
	19.20451816738155 0.06598081339825423		19.20451816738155 1.5000592906137633E9	19.20451816738155 -9.430117807318699E-5
	19.21374261329146 0.06599887708475105		19.21374261329146 1.5000593063466892E9	19.21374261329146 -9.413679688774573E-5
	19.223216579003928 0.06602440483141425		19.223216579003928 1.5000593288932817E9	19.223216579003928 -9.389929159375837E-5
	19.23266147518579 0.06605878623570671		19.23266147518579 1.5000593594921288E9	19.23266147518579 -9.357708811930182E-5
	19.242131201976385 0.06610202129764087		19.242131201976385 1.50005939814323E9	19.242131201976385 -9.317018646415403E-5
	19.252096353070886 0.06616499919390773		19.252096353070886 1.5000594545696764E9	19.252096353070886 -9.257789596717275E-5
	19.261808101707018 0.06624960181291772		19.261808101707018 1.500059530550274E9	19.261808101707018 -9.17840599474759E-5
	19.271329823418252 0.06635582915467975		19.271329823418252 1.5000596260850224E9	19.271329823418252 -9.07886784046194E-5
	19.280230766793466 0.06648737608502042		19.280230766793466 1.500059744434253E9	19.280230766793466 -8.95606105997268E-5
	19.28892368669637 0.06665115230613683		19.28892368669637 1.5000598920551353E9	19.28892368669637 -8.803605540341846E-5
	19.29746207583082 0.06684715781803963		19.29746207583082 1.5000600689476693E9	19.29746207583082 -8.621501281525029E-5
	19.305327050077675 0.06707025559809043		19.305327050077675 1.500060270608416E9	19.305327050077675 -8.414669675216396E-5
	19.313015529442787 0.06732971856903713		19.313015529442787 1.500060505833747E9	19.313015529442787 -8.17448440291199E-5
	19.32057487422502 0.06762554673089038		19.32057487422502 1.5000607746236613E9	19.32057487422502 -7.900945464600711E-5
	19.327290280843012 0.06793043167385537		19.327290280843012 1.500061052480266E9	19.327290280843012 -7.619332317743226E-5
	19.333874521125367 0.06826569276031957		19.333874521125367 1.500061359170725E9	19.333874521125367 -7.309888285034288E-5
	19.340368587485347 0.06863132999028476		19.340368587485347 1.5000616946950388E9	19.340368587485347 -6.972613366462793E-5
	19.34609121843889 0.06898640788919064		19.34609121843889 1.5000620218132951E9	19.34609121843889 -6.64525990592421E-5
	19.351736530654478 0.0693622302288146		19.351736530654478 1.5000623694787438E9	19.351736530654478 -6.298921182135236E-5
	19.35734016038397 0.06975879700916376		19.35734016038397 1.5000627376913836E9	19.35734016038397 -5.933597195118073E-5
	19.362405210374746 0.07013797055285576		19.362405210374746 1.5000630912797391E9	19.362405210374746 -5.5844162036634276E-5
	19.367447065392177 0.07052842427683625		19.367447065392177 1.5000634569369054E9	19.367447065392177 -5.2249440577468436E-5
	19.372497858706854 0.07093015818109993		19.372497858706854 1.5000638346628816E9	19.372497858706854 -4.8551807574016275E-5
	19.377304445510156 0.07132117308699559		19.377304445510156 1.5000642039392242E9	19.377304445510156 -4.4953791792035896E-5
	19.382143158800456 0.0717167216274488		19.382143158800456 1.5000645790922308E9	19.382143158800456 -4.131496937942541E-5
	19.387044900335148 0.07211680380247376		19.387044900335148 1.5000649601219013E9	19.387044900335148 -3.7635340335851746E-5
	19.39206213964631 0.07251987087039868		19.39206213964631 1.5000653457250226E9	19.39206213964631 -3.392934994539492E-5
	19.39718034914847 0.07292038122821953		19.39718034914847 1.500065730506358E9	19.39718034914847 -3.0248010497225524E-5
	19.40243231225029 0.07331833487594164		19.40243231225029 1.5000661144659064E9	19.40243231225029 -2.659132199089947E-5
	19.408179853948937 0.07373096530688716		19.408179853948937 1.5000665144119883E9	19.408179853948937 -2.2801422885133365E-5
	19.41413198744966 0.07413095575375994		19.41413198744966 1.5000669036842618E9	19.41413198744966 -1.9129550260400246E-5
	19.420325715167188 0.0745183062165653		19.420325715167188 1.5000672822827265E9	19.420325715167188 -1.5575704116367045E-5
	19.427180701855505 0.07490442005269227		19.427180701855505 1.5000676612924287E9	19.427180701855505 -1.2036140124572486E-5
	19.43437598761473 0.07526539506957075		19.43437598761473 1.5000680168224182E9	19.43437598761473 -8.73060677530984E-6
	19.44194925126888 0.07560123126720608		19.44194925126888 1.5000683488726945E9	19.44194925126888 -5.659104068579108E-6
	19.449975350104573 0.07590267036090115		19.449975350104573 1.5000686478134446E9	19.449975350104573 -2.9075027517819156E-6
	19.45845512071555 0.07617109463969829		19.45845512071555 1.5000689145119746E9	19.45845512071555 -4.635779597980619E-7
	19.46741927514832 0.07640650410359573		19.46741927514832 1.500069148968283E9	19.46741927514832 1.672670307594498E-6
	19.475536451850243 0.07657789741090415		19.475536451850243 1.5000693197232268E9	19.475536451850243 3.22042678624263E-6
	19.484059206407263 0.07672620763088656		19.484059206407263 1.5000694674190688E9	19.484059206407263 4.551806485507964E-6
	19.49300307553728 0.0768514347635394		19.49300307553728 1.5000695920558088E9	19.49300307553728 5.666809405501521E-6
	19.50171225476182 0.07694583663453347		19.50171225476182 1.500069685704743E9	19.50171225476182 6.49691446419271E-6
	19.510584221913142 0.07702123645181214		19.510584221913142 1.5000697601030865E9	19.510584221913142 7.148776868581013E-6
	19.519662913001856 0.07707763421537894		19.519662913001856 1.5000698152508397E9	19.519662913001856 7.622396618888477E-6
	19.53030496486006 0.07712344244798519		19.53030496486006 1.5000698591576612E9	19.53030496486006 7.986663631775199E-6
	19.541170531241534 0.07715828893602339		19.541170531241534 1.5000698914509723E9	19.541170531241534 8.239613168758159E-6
	19.55227469291787 0.07718217367948998		19.55227469291787 1.5000699121307733E9	19.55227469291787 8.381245229726337E-6
	19.564959928455742 0.07720083278375167		19.564959928455742 1.5000699260046186E9	19.564959928455742 8.444650724691866E-6
	19.577735737043383 0.07721470740449288		19.577735737043383 1.5000699329760964E9	19.577735737043383 8.423570912573792E-6
	19.590602135914747 0.07722379754173492		19.590602135914747 1.5000699330452058E9	19.590602135914747 8.318005793927225E-6
	19.603183904589454 0.07723016078732403		19.603183904589454 1.5000699269098556E9	19.603183904589454 8.119280899498155E-6
	19.61564543635671 0.07723495727735408		19.61564543635671 1.5000699134439726E9	19.61564543635671 7.790605040302329E-6
	19.6280097601435 0.07723818701183038		19.6280097601435 1.5000698926475558E9	19.6280097601435 7.331978217116902E-6
	19.638373571581685 0.07724016754425111		19.638373571581685 1.5000698662910311E9	19.638373571581685 6.7753574592979755E-6
	19.648634651020668 0.0772415993772837		19.648634651020668 1.500069830069954E9	19.648634651020668 6.024348923271699E-6
	19.658848662191676 0.07724248251093169		19.658848662191676 1.5000697839843242E9	19.658848662191676 5.078952609260117E-6
	19.667418469671976 0.07724285831895639		19.667418469671976 1.5000697336569426E9	19.667418469671976 4.052057342106846E-6
	19.676047836157633 0.07724293871422727		19.676047836157633 1.5000696722337956E9	19.676047836157633 2.8007597998583373E-6
	19.684801485522296 0.07724272369674079		19.684801485522296 1.500069599714883E9	19.684801485522296 1.3250599825145923E-6
	19.693040758852504 0.0772422516783342		19.693040758852504 1.5000695196989732E9	19.693040758852504 -3.0341791412785174E-7
	19.70154105734756 0.07724153204395723		19.70154105734756 1.500069427135108E9	19.70154105734756 -2.190105051647901E-6
	19.71036753799012 0.07724056479360986		19.71036753799012 1.5000693220232866E9	19.71036753799012 -4.335001429712488E-6
	19.719785543307037 0.07723930862595285		19.719785543307037 1.5000691999484868E9	19.719785543307037 -6.831043082967387E-6
	19.729750292531246 0.0772377733763312		19.729750292531246 1.5000690628015604E9	19.729750292531246 -9.644667880338292E-6
	19.74032687144432 0.07723595904474667		19.74032687144432 1.5000689105825076E9	19.74032687144432 -1.2775875821825205E-5
	19.751681331325404 0.077233835331044		19.751681331325404 1.5000687414815567E9	19.751681331325404 -1.6267189340225246E-5
	19.76387765335939 0.07723134611013283		19.76387765335939 1.5000685549914823E9	19.76387765335939 -2.013851519999748E-5
	19.776966122712132 0.07722849138201848		19.776966122712132 1.5000683511122844E9	19.776966122712132 -2.438985340080884E-5
	19.78965715467075 0.07722542027004042		19.78965715467075 1.5000681438930683E9	19.78965715467075 -2.873793460855894E-5
	19.80324353221304 0.07722133638705575		19.80324353221304 1.5000678896070077E9	19.80324353221304 -3.412404745106817E-5
	19.81775113461819 0.07721623973307512		19.81775113461819 1.5000675882541022E9	19.81775113461819 -4.0548191928447546E-5
	19.83068848459551 0.07721187790072381		19.83068848459551 1.5000673387518365E9	19.83068848459551 -4.595629395032302E-5
	19.843079328737726 0.0772086987092715		19.843079328737726 1.5000671504443004E9	19.843079328737726 -5.006593755152527E-5
	19.855007196529527 0.07720670215871817		19.855007196529527 1.5000670233314924E9	19.855007196529527 -5.287712273149919E-5
	19.866823333380108 0.07720522242276484		19.866823333380108 1.5000669208204904E9	19.866823333380108 -5.516431464414134E-5
	19.878371736637288 0.07720410909959785		19.878371736637288 1.5000668328659143E9	19.878371736637288 -5.7140602237605026E-5
	19.889728676839567 0.07720336218921897		19.889728676839567 1.5000667594677632E9	19.889728676839567 -5.880598551144616E-5
	19.902900018946035 0.07720293226647623		19.902900018946035 1.5000666887764766E9	19.902900018946035 -6.042557811469867E-5
	19.915984681483106 0.07720299829851474		19.915984681483106 1.5000666287377236E9	19.915984681483106 -6.181486483236658E-5
	19.929059255019922 0.07720356028534159		19.929059255019922 1.5000665793515034E9	19.929059255019922 -6.297384566411684E-5
	19.943990249856245 0.07720493296714981		19.943990249856245 1.500066534244115E9	19.943990249856245 -6.405121961294918E-5
	19.958925571998773 0.07720749674621086		19.958925571998773 1.5000664975989316E9	19.958925571998773 -6.495048174526368E-5
	19.973910289806188 0.07721125162253895		19.973910289806188 1.500066469415952E9	19.973910289806188 -6.56716320602832E-5
	19.988191412387653 0.07721653243757753		19.988191412387653 1.5000664500197964E9	19.988191412387653 -6.620756428543733E-5
	20.00236837544746 0.07722475800999273		20.00236837544746 1.5000664373921328E9	20.00236837544746 -6.662393294865148E-5
	20.016448240537507 0.0772359283397952		20.016448240537507 1.5000664315329602E9	20.016448240537507 -6.69207380497036E-5
	20.0283872996336 0.07724943223667413		20.0283872996336 1.5000664328987827E9	20.0283872996336 -6.707684944484787E-5
	20.04010966961896 0.07726895742927642		20.04010966961896 1.5000664418970416E9	20.04010966961896 -6.713416597381532E-5
	20.05161551988465 0.07729450391761628		20.05161551988465 1.500066458527737E9	20.05161551988465 -6.709268763593983E-5
	20.061568668266634 0.077325266249475		20.061568668266634 1.5000664824122312E9	20.061568668266634 -6.69500291539124E-5
	20.07125746668132 0.0773674419702699		20.07125746668132 1.5000665183129022E9	20.07125746668132 -6.667986988828727E-5
	20.08068774966426 0.07742103108001341		20.08068774966426 1.5000665662297487E9	20.08068774966426 -6.628220983839833E-5
	20.088945345062772 0.07748451877696905		20.088945345062772 1.5000666248468463E9	20.088945345062772 -6.576772384714407E-5
	20.096950764697265 0.0775668087916559		20.096950764697265 1.500066702323937E9	20.096950764697265 -6.506827682262267E-5
	20.104720475321862 0.07766790112407218		20.104720475321862 1.5000667986610193E9	20.104720475321862 -6.418386876416798E-5
	20.11151301962399 0.07778262238310685		20.11151301962399 1.5000669089298587E9	20.11151301962399 -6.316090108415911E-5
	20.11812546488451 0.0779230060513294		20.11812546488451 1.5000670447333336E9	20.11812546488451 -6.189581257221104E-5
	20.12458658875064 0.07808905212873452		20.12458658875064 1.5000672060714443E9	20.12458658875064 -6.038860322865685E-5
	20.130147925818054 0.07826483259334172		20.130147925818054 1.5000673775205574E9	20.130147925818054 -5.878520225588518E-5
	20.135644511235583 0.07846905601944609		20.135644511235583 1.500067577488145E9	20.135644511235583 -5.691761926673949E-5
	20.141110466665236 0.07870172240704232		20.141110466665236 1.5000678059742064E9	20.141110466665236 -5.4785854261774896E-5
	20.14605014530382 0.07894442248730638		20.14605014530382 1.500068045029917E9	20.14605014530382 -5.2559247545437E-5
	20.151036679401425 0.07921842842915527		20.151036679401425 1.5000683159903889E9	20.151036679401425 -5.004394362873115E-5
[truncated: 13,889 more rows]
